# Supplementary material for: The Indispensable Role of Histone Methyltransferase PoDot1 in Extracellular Glycoside Hydrolase Biosynthesis of Penicillium oxalicum
Source: Front Microbiol. 2019 Nov 7;10:2566. doi: 10.3389/fmicb.2019.02566 (PMC6853848; doi:10.3389/fmicb.2019.02566)
Supplement: TABLE S2 — 800 genes exhibited significant differences (fold change ≥ 2, probability ≥ 0.8) between ΔPodot1 and WT after cultivation in glucose medium. [file Table_2.XLSX]

## Sheet: WT_G-VS-Ddot1_G.GeneDiffExpFilt
Supplementary Table 2. 800 genes exhibited significant differences (fold change ≥ 2, probability ≥ 0.8) between the ΔPodot1 and WT after cultivation in glucose medium.
GeneID	geneLength	Means-WT_G	Means-Ddot1_G	log2Ratio(Ddot1_G/WT_G)	Up-Down-Regulation(Ddot1_G/WT_G)	Probability	KEGG Orthology	GO Component	GO Function	GO Process	Blast nr
PDE_00017	1525	12.7567	60.3067	2.24107	Up	0.876166	-	-	-	-	gi|525578836|gb|EPS25086.1|/0/hypothetical protein PDE_00017 [Penicillium oxalicum 114-2]
PDE_00023	1588	1.51	25.6467	4.08615	Up	0.828364	-	-	-	-	gi|525578842|gb|EPS25092.1|/0/hypothetical protein PDE_00023 [Penicillium oxalicum 114-2]
PDE_00046	679	52.9867	236.433	2.15773	Up	0.931455	K10273|1|7e-19|94.4|ure:UREG_01757|F-box and leucine-rich repeat protein 7	-	-	-	gi|525578865|gb|EPS25115.1|/1.69339e-93/hypothetical protein PDE_00046 [Penicillium oxalicum 114-2]
PDE_00070	1344	2.89333	34.6333	3.58136	Up	0.854724	K05528|1|3e-22|107|ppa:PAS_chr1-3_0251|alpha 1,6-mannosyltransferase [EC:2.4.1.232]	-	-	-	gi|525578889|gb|EPS25139.1|/0/putative alpha-1,6-mannosyltransferase [Penicillium oxalicum 114-2]
PDE_00092	1055	306.093	17.7867	-4.1051	Down	0.96183	K01166|1|1e-79|244|pcs:Pc06g00430|ribonuclease T2 [EC:3.1.27.1]	-	-	-	gi|525578911|gb|EPS25161.1|/2.10166e-118/hypothetical protein PDE_00092 [Penicillium oxalicum 114-2]
PDE_00121	1569	13.9833	118.54	3.08359	Up	0.929242	-	-	-	-	gi|525578939|gb|EPS25189.1|/5.259e-159/hypothetical protein PDE_00121 [Penicillium oxalicum 114-2]
PDE_00126	1713	94.2233	239.23	1.34424	Up	0.873953	K04441|1|2e-152|399|ang:ANI_1_826074|p38 MAP kinase [EC:2.7.11.24]	GO:0044424	GO:0004674//protein serine/threonine kinase activity;GO:0097159//organic cyclic compound binding;GO:1901363//heterocyclic compound binding;GO:0036094//small molecule binding	GO:0006796//phosphate-containing compound metabolic process;GO:0050794//regulation of cellular process;GO:0006351//transcription, DNA-templated	gi|525578944|gb|EPS25194.1|/5.74382e-163/hypothetical protein PDE_00126 [Penicillium oxalicum 114-2]
PDE_00136	980	90.36	232.663	1.36449	Up	0.875655	-	-	GO:0005488//binding	-	gi|525578954|gb|EPS25204.1|/2.21016e-159/hypothetical protein PDE_00136 [Penicillium oxalicum 114-2]
PDE_00144	336	14.6133	118.723	3.02225	Up	0.928766	-	-	-	-	gi|525578962|gb|EPS25212.1|/1.19557e-57/hypothetical protein PDE_00144 [Penicillium oxalicum 114-2]
PDE_00188	469	987.703	416.81	-1.24469	Down	0.874872	-	-	-	-	gi|525579005|gb|EPS25255.1|/2.91434e-19/hypothetical protein PDE_00188 [Penicillium oxalicum 114-2]
PDE_00203	509	117.183	470.107	2.00422	Up	0.935709	K10389|1|9e-13|73.2|fpu:FPSE_03892|tubulin gamma	-	-	-	gi|525579020|gb|EPS25270.1|/1.6894e-71/hypothetical protein PDE_00203 [Penicillium oxalicum 114-2]
PDE_00223	4828	58.9067	135.87	1.20572	Up	0.838456	K13830|1|0.0|2768|pcs:Pc16g12160|pentafunctional AROM polypeptide [EC:4.2.3.4 4.2.1.10 1.1.1.25 2.7.1.71 2.5.1.19]	GO:0044424	GO:0043169//cation binding;GO:0032550;GO:0016616//oxidoreductase activity, acting on the CH-OH group of donors, NAD or NADP as acceptor;GO:0016765//transferase activity, transferring alkyl or aryl (other than methyl) groups;GO:0016301//kinase activity;GO:0016838;GO:0016836//hydro-lyase activity	GO:0008652//cellular amino acid biosynthetic process;GO:0006796//phosphate-containing compound metabolic process;GO:0043650	gi|525579040|gb|EPS25290.1|/0/hypothetical protein PDE_00223 [Penicillium oxalicum 114-2]
PDE_00230	2091	321.51	146.567	-1.13331	Down	0.845756	K03034|1|3e-16|87.8|clu:CLUG_01409|26S proteasome regulatory subunit N4	-	-	-	gi|525579047|gb|EPS25297.1|/0/hypothetical protein PDE_00230 [Penicillium oxalicum 114-2]
PDE_00251	771	127.923	344.217	1.42804	Up	0.890375	K07734|1|2e-92|339|afv:AFLA_021360|transcriptional regulator	-	GO:0003824//catalytic activity;GO:0032553//ribonucleotide binding	GO:0044710	gi|525579068|gb|EPS25318.1|/2.46694e-145/hypothetical protein PDE_00251 [Penicillium oxalicum 114-2]
PDE_00271	1789	159.743	79.8633	-1.00015	Down	0.800507	K20361|1|5e-09|63.5|ang:ANI_1_2078074|intracellular protein transport protein USO1;K10352|3|3e-08|61.2|ndi:NDAI_0D01830|myosin heavy chain;K09291|5|3e-08|60.8|sce:YKR095W|nucleoprotein TPR	-	-	-	gi|525579088|gb|EPS25338.1|/0/hypothetical protein PDE_00271 [Penicillium oxalicum 114-2]
PDE_00295	4603	17.0567	94.9367	2.47663	Up	0.909775	K08711|1|0.0|1050|cne:CNB05770|ATP-binding cassette, subfamily G (WHITE), member 2, PDR	GO:0031224//intrinsic component of membrane	GO:0017111//nucleoside-triphosphatase activity;GO:0032550;GO:0015405	GO:0009154//purine ribonucleotide catabolic process;GO:0051234//establishment of localization	gi|525579112|gb|EPS25362.1|/0/hypothetical protein PDE_00295 [Penicillium oxalicum 114-2]
PDE_00306	723	119.08	672.483	2.49757	Up	0.952284	K01733|1|5e-39|161|ure:UREG_05841|threonine synthase [EC:4.2.3.1];K01560|2|7e-09|61.2|nhe:NECHADRAFT_41372|2-haloacid dehalogenase [EC:3.8.1.2]	-	GO:0016824	-	gi|525579123|gb|EPS25373.1|/9.17017e-136/hypothetical protein PDE_00306 [Penicillium oxalicum 114-2]
PDE_00322	1119	903.12	1952.47	1.11231	Up	0.854111	K13993|1|8e-36|151|aje:HCAG_02306|HSP20 family protein	-	-	-	gi|525579139|gb|EPS25389.1|/5.60804e-167/hypothetical protein PDE_00322 [Penicillium oxalicum 114-2]
PDE_00323	1737	14.2067	56.3833	1.9887	Up	0.8592	K03885|1|0.0|726|pcs:Pc16g14290|NADH dehydrogenase [EC:1.6.99.3]	-	GO:0003824//catalytic activity;GO:0000166//nucleotide binding	GO:0044710	gi|525579140|gb|EPS25390.1|/0/hypothetical protein PDE_00323 [Penicillium oxalicum 114-2]
PDE_00326	824	3830.95	1820.52	-1.07335	Down	0.847475	K04564|1|5e-81|301|pcs:Pc16g14220|superoxide dismutase, Fe-Mn family [EC:1.15.1.1]	GO:0005739//mitochondrion	GO:0003824//catalytic activity	GO:0008152//metabolic process	gi|525579143|gb|EPS25393.1|/3.67391e-97/hypothetical protein PDE_00326 [Penicillium oxalicum 114-2]
PDE_00327	611	4323.38	1608.35	-1.42658	Down	0.902985	-	-	-	-	gi|525579144|gb|EPS25394.1|/6.7141e-37/hypothetical protein PDE_00327 [Penicillium oxalicum 114-2]
PDE_00332	2780	53.7867	125.703	1.2247	Up	0.837094	K14152|1|0.0|838|pcs:Pc16g14140|phosphoribosyl-ATP pyrophosphohydrolase / phosphoribosyl-AMP cyclohydrolase / histidinol dehydrogenase [EC:3.6.1.31 3.5.4.19 1.1.1.23]	-	GO:0046914//transition metal ion binding;GO:0016616//oxidoreductase activity, acting on the CH-OH group of donors, NAD or NADP as acceptor;GO:0016462//pyrophosphatase activity;GO:0019238//cyclohydrolase activity;GO:0000166//nucleotide binding	GO:0006547//histidine metabolic process	gi|525579149|gb|EPS25399.1|/0/hypothetical protein PDE_00332 [Penicillium oxalicum 114-2]
PDE_00350	601	26.2467	268.553	3.355	Up	0.953424	-	-	-	-	gi|525579167|gb|EPS25417.1|/2.2153e-37/hypothetical protein PDE_00350 [Penicillium oxalicum 114-2]
PDE_00369	3098	2494.9	694.75	-1.84442	Down	0.936407	K10534|1|0.0|438|pcs:Pc13g11410|nitrate reductase (NAD(P)H) [EC:1.7.1.1 1.7.1.2 1.7.1.3]	-	GO:0046914//transition metal ion binding;GO:0016491//oxidoreductase activity;GO:1901363//heterocyclic compound binding;GO:0050662//coenzyme binding;GO:0097159//organic cyclic compound binding	GO:0044710	gi|525579186|gb|EPS25436.1|/0/hypothetical protein PDE_00369 [Penicillium oxalicum 114-2]
PDE_00370	3871	5239.92	1993.38	-1.39432	Down	0.898645	K17877|1|0.0|621|pcs:Pc13g11420|nitrite reductase (NAD(P)H) [EC:1.7.1.4]	-	GO:0046906//tetrapyrrole binding;GO:0051536//iron-sulfur cluster binding;GO:0046857;GO:0000166//nucleotide binding	GO:0042126//nitrate metabolic process	gi|525579187|gb|EPS25437.1|/0/hypothetical protein PDE_00370 [Penicillium oxalicum 114-2]
PDE_00371	1905	946.043	469.203	-1.01169	Down	0.829062	K02575|1|2e-166|354|ang:ANI_1_806074|MFS transporter, NNP family, nitrate/nitrite transporter	-	-	GO:0044765//single-organism transport	gi|525579188|gb|EPS25438.1|/0/hypothetical protein PDE_00371 [Penicillium oxalicum 114-2]
PDE_00401	1224	290.277	794.633	1.45286	Up	0.900568	K01216|1|2e-53|210|pic:PICST_25832|licheninase [EC:3.2.1.73]	GO:0016020//membrane	GO:0016787//hydrolase activity	-	gi|525579218|gb|EPS25468.1|/1.38578e-145/putative chitin glucanosyltransferase [Penicillium oxalicum 114-2]
PDE_00422	1470	41.6967	105.043	1.33298	Up	0.845552	-	-	-	-	gi|525579239|gb|EPS25489.1|/1.15612e-144/hypothetical protein PDE_00422 [Penicillium oxalicum 114-2]
PDE_00440	1448	0.97	38.93	5.32675	Up	0.886359	K03846|1|2e-14|81.3|ure:UREG_07209|alpha-1,2-mannosyltransferase [EC:2.4.1.259 2.4.1.261]	-	-	-	gi|525579257|gb|EPS25507.1|/8.71074e-121/hypothetical protein PDE_00440 [Penicillium oxalicum 114-2]
PDE_00455	1472	87.9533	215.77	1.29468	Up	0.864305	K01866|1|1e-140|268|ani:AN0057.2|tyrosyl-tRNA synthetase [EC:6.1.1.1]	GO:0044424	GO:0004812//aminoacyl-tRNA ligase activity;GO:0032550	GO:0006418//tRNA aminoacylation for protein translation	gi|525579272|gb|EPS25522.1|/0/hypothetical protein PDE_00455 [Penicillium oxalicum 114-2]
PDE_00503	702	179.133	614.38	1.7781	Up	0.927626	-	-	-	-	gi|525579319|gb|EPS25569.1|/4.168e-70/hypothetical protein PDE_00503 [Penicillium oxalicum 114-2]
PDE_00505	2691	32.44	83.6767	1.36705	Up	0.838098	K00866|1|0.0|466|afv:AFLA_083430|choline kinase [EC:2.7.1.32]	-	GO:0016772//transferase activity, transferring phosphorus-containing groups	-	gi|238484039|ref|XP_002373258.1|/0/choline kinase, putative [Aspergillus flavus NRRL3357]
PDE_00508	1530	3300.59	374.363	-3.14021	Down	0.96503	-	-	-	-	gi|525579324|gb|EPS25574.1|/0/hypothetical protein PDE_00508 [Penicillium oxalicum 114-2]
PDE_00509	1716	3744.95	531.6	-2.81653	Down	0.962511	-	-	-	-	gi|525579325|gb|EPS25575.1|/2.07098e-147/hypothetical protein PDE_00509 [Penicillium oxalicum 114-2]
PDE_00510	1950	4.05	33.3367	3.04112	Up	0.841808	-	-	-	-	gi|525579326|gb|EPS25576.1|/0/hypothetical protein PDE_00510 [Penicillium oxalicum 114-2]
PDE_00538	996	9.86	55.8533	2.50198	Up	0.878395	K14309|1|2e-07|57.4|maw:MAC_00028|nuclear pore complex protein Nup93;K09043|2|1e-05|51.6|sla:SERLADRAFT_442978|fungal AP-1-like factor	-	-	-	gi|525579354|gb|EPS25604.1|/2.49678e-144/hypothetical protein PDE_00538 [Penicillium oxalicum 114-2]
PDE_00539	1561	23.0367	88.97	1.94939	Up	0.888299	K05283|1|0.0|683|pcs:Pc16g13450|phosphatidylinositol glycan, class W [EC:2.3.-.-]	GO:0031224//intrinsic component of membrane;GO:0043231//intracellular membrane-bounded organelle;GO:0031090//organelle membrane	GO:0016740//transferase activity	GO:0006497//protein lipidation	gi|525579355|gb|EPS25605.1|/0/hypothetical protein PDE_00539 [Penicillium oxalicum 114-2]
PDE_00555	1908	238.733	95.9567	-1.31495	Down	0.869342	K12584|1|9e-19|62.8|ure:UREG_00738|m7GpppX diphosphatase [EC:3.6.1.59];K06897|3|3e-12|48.9|tmn:UCRPA7_8510|7,8-dihydropterin-6-yl-methyl-4-(beta-D-ribofuranosyl)aminobenzene 5'-phosphate synthase [EC:2.5.1.105]	-	-	-	gi|525579371|gb|EPS25621.1|/7.95195e-165/hypothetical protein PDE_00555 [Penicillium oxalicum 114-2]
PDE_00566	1581	51.0067	147.547	1.53241	Up	0.880845	K19366|1|0.0|642|pcs:Pc16g13610|spartin	-	-	-	gi|525579382|gb|EPS25632.1|/0/hypothetical protein PDE_00566 [Penicillium oxalicum 114-2]
PDE_00588	3875	12.34	50.9833	2.04668	Up	0.854724	K12236|1|0.0|1518|pcs:Pc21g09140|transcriptional repressor NF-X1	-	GO:0005488//binding	-	gi|525579404|gb|EPS25654.1|/0/hypothetical protein PDE_00588 [Penicillium oxalicum 114-2]
PDE_00592	2028	1.98	44.41	4.48731	Up	0.888826	K08197|1|1e-56|221|psq:PUNSTDRAFT_124252|MFS transporter, SIT family, siderophore-iron:H+ symporter	-	-	-	gi|525579408|gb|EPS25658.1|/0/hypothetical protein PDE_00592 [Penicillium oxalicum 114-2]
PDE_00595	2108	25.1333	2.18333	-3.525	Down	0.816946	K00681|1|0.0|328|act:ACLA_006420|gamma-glutamyltranspeptidase / glutathione hydrolase [EC:2.3.2.2 3.4.19.13]	-	GO:0016755//transferase activity, transferring amino-acyl groups	GO:0006790//sulfur compound metabolic process	gi|525579411|gb|EPS25661.1|/0/hypothetical protein PDE_00595 [Penicillium oxalicum 114-2]
PDE_00604	1937	7.85333	40.3767	2.36214	Up	0.845603	K06901|1|0.0|521|afm:AFUA_5G09750|putative MFS transporter, AGZA family, xanthine/uracil permease	-	-	GO:0051234//establishment of localization;GO:0044763	gi|525579420|gb|EPS25670.1|/0/hypothetical protein PDE_00604 [Penicillium oxalicum 114-2]
PDE_00615	1160	372.687	138.763	-1.42534	Down	0.89143	K01210|1|6e-96|351|pcs:Pc13g08730|glucan 1,3-beta-glucosidase [EC:3.2.1.58]	-	GO:0016798//hydrolase activity, acting on glycosyl bonds	GO:0008152//metabolic process	gi|525579431|gb|EPS25681.1|/3.61137e-165/putative beta-1,3-glucanosyltransferase [Penicillium oxalicum 114-2]
PDE_00618	303	218.807	87.94	-1.31507	Down	0.868848	-	-	-	-	gi|525579434|gb|EPS25684.1|/1.0757e-50/hypothetical protein PDE_00618 [Penicillium oxalicum 114-2]
PDE_00633	684	26.2667	2.28	-3.52613	Down	0.822544	-	-	-	-	gi|525579449|gb|EPS25699.1|/1.27903e-96/hypothetical protein PDE_00633 [Penicillium oxalicum 114-2]
PDE_00642	597	75.11	26.54	-1.50084	Down	0.844939	K00860|1|2e-07|55.8|maj:MAA_00215|adenylylsulfate kinase [EC:2.7.1.25]	-	GO:0005488//binding	-	gi|525579458|gb|EPS25708.1|/6.22472e-109/hypothetical protein PDE_00642 [Penicillium oxalicum 114-2]
PDE_00663	1083	388.343	117.557	-1.72398	Down	0.919049	K15071|1|5e-09|62.8|ani:AN0358.2|recyclin-1	-	-	-	gi|525579477|gb|EPS25727.1|/4.3075e-92/hypothetical protein PDE_00663 [Penicillium oxalicum 114-2]
PDE_00679	1770	239.883	61.44	-1.96508	Down	0.923099	K03320|1|0.0|587|pcs:Pc13g13490|ammonium transporter, Amt family	GO:0031224//intrinsic component of membrane	GO:0008509//anion transmembrane transporter activity	GO:0015696//ammonium transport	gi|525579493|gb|EPS25743.1|/0/hypothetical protein PDE_00679 [Penicillium oxalicum 114-2]
PDE_00710	914	2763.95	1167.96	-1.24274	Down	0.87768	-	GO:0031224//intrinsic component of membrane	-	-	gi|525579524|gb|EPS25774.1|/2.74673e-123/hypothetical protein PDE_00710 [Penicillium oxalicum 114-2]
PDE_00716	1581	18.2267	106.137	2.5418	Up	0.916377	K19564|1|6e-75|282|bor:COCMIDRAFT_34174|choline transport protein	GO:0031224//intrinsic component of membrane	GO:0043168//anion binding;GO:0046943//carboxylic acid transmembrane transporter activity	GO:0006865//amino acid transport	gi|525579530|gb|EPS25780.1|/0/hypothetical protein PDE_00716 [Penicillium oxalicum 114-2]
PDE_00759	2565	24.8467	77.07	1.63312	Up	0.861667	K20046|1|8e-07|57.0|fme:FOMMEDRAFT_141675|actin cytoskeleton-regulatory complex protein SLA1	-	-	-	gi|525579573|gb|EPS25823.1|/0/hypothetical protein PDE_00759 [Penicillium oxalicum 114-2]
PDE_00760	874	1.03	40.6733	5.30337	Up	0.890069	-	-	-	-	gi|525579574|gb|EPS25824.1|/4.40797e-59/hypothetical protein PDE_00760 [Penicillium oxalicum 114-2]
PDE_00764	312	82.45	36.8433	-1.16212	Down	0.806123	-	-	-	-	gi|525579578|gb|EPS25828.1|/2.24091e-35/hypothetical protein PDE_00764 [Penicillium oxalicum 114-2]
PDE_00770	1935	59.5033	5.79333	-3.3605	Down	0.898901	-	-	-	-	gi|525579584|gb|EPS25834.1|/0/hypothetical protein PDE_00770 [Penicillium oxalicum 114-2]
PDE_00772	336	316.573	82.4533	-1.94089	Down	0.927336	-	-	-	-	gi|525579586|gb|EPS25836.1|/8.27959e-59/hypothetical protein PDE_00772 [Penicillium oxalicum 114-2]
PDE_00773	171	395.38	90.6633	-2.12465	Down	0.938704	-	-	-	-	gi|525579587|gb|EPS25837.1|/1.51538e-15/hypothetical protein PDE_00773 [Penicillium oxalicum 114-2]
PDE_00816	1250	31.6067	95.6867	1.59809	Up	0.871061	K00765|1|2e-128|459|nfi:NFIA_025470|ATP phosphoribosyltransferase [EC:2.4.2.17];K08736|3|3e-126|452|afv:AFLA_073760|DNA mismatch repair protein MSH3	GO:0044424	GO:0032550;GO:0003690//double-stranded DNA binding;GO:0016763//transferase activity, transferring pentosyl groups;GO:0046872//metal ion binding	GO:0006281//DNA repair;GO:0006547//histidine metabolic process	gi|525579630|gb|EPS25880.1|/3.61211e-141/hypothetical protein PDE_00816 [Penicillium oxalicum 114-2]
PDE_00820	1262	32.8333	75.4367	1.2001	Up	0.806599	K05956|1|4e-140|248|pcs:Pc21g08870|geranylgeranyl transferase type-2 subunit beta [EC:2.5.1.60]	GO:0043234//protein complex	GO:0004661//protein geranylgeranyltransferase activity	GO:0018342//protein prenylation;GO:0016482//cytosolic transport;GO:0006605//protein targeting	gi|525579634|gb|EPS25884.1|/2.30573e-167/hypothetical protein PDE_00820 [Penicillium oxalicum 114-2]
PDE_00830	1926	77.1867	3.61333	-4.41695	Down	0.924954	K16261|1|5e-153|385|pfj:MYCFIDRAFT_190787|yeast amino acid transporter	GO:0016020//membrane	-	GO:0044763;GO:0006865//amino acid transport	gi|525579644|gb|EPS25894.1|/0/hypothetical protein PDE_00830 [Penicillium oxalicum 114-2]
PDE_00836	1596	3.43667	57.1333	4.05525	Up	0.903802	-	-	-	-	gi|525579650|gb|EPS25900.1|/0/hypothetical protein PDE_00836 [Penicillium oxalicum 114-2]
PDE_00863	1243	184.763	51.01	-1.85683	Down	0.912514	-	-	-	-	gi|525579677|gb|EPS25927.1|/3.60269e-46/hypothetical protein PDE_00863 [Penicillium oxalicum 114-2]
PDE_00864	1951	106.92	45.96	-1.21808	Down	0.829777	K08288|1|0.0|666|pcs:Pc21g04650|protein kinase C substrate 80K-H	-	-	GO:0044237//cellular metabolic process	gi|525579678|gb|EPS25928.1|/0/hypothetical protein PDE_00864 [Penicillium oxalicum 114-2]
PDE_00869	464	421.34	159.79	-1.39881	Down	0.889473	K10632|1|2e-06|51.6|tre:TRIREDRAFT_49818|BRCA1-associated protein [EC:2.3.2.27];K14565|2|3e-06|51.2|tml:GSTUM_00005090001|nucleolar protein 58;K10601|3|4e-06|50.8|mgl:MGL_1081|E3 ubiquitin-protein ligase synoviolin [EC:2.3.2.27]	-	GO:0046914//transition metal ion binding	-	gi|525579683|gb|EPS25933.1|/5.9184e-63/hypothetical protein PDE_00869 [Penicillium oxalicum 114-2]
PDE_00873	1343	89.02	263.967	1.56815	Up	0.900415	K01626|1|3e-171|602|pcs:Pc21g04710|3-deoxy-7-phosphoheptulonate synthase [EC:2.5.1.54]	GO:0043231//intracellular membrane-bounded organelle	GO:0016765//transferase activity, transferring alkyl or aryl (other than methyl) groups	GO:0008652//cellular amino acid biosynthetic process;GO:0043650	gi|525579687|gb|EPS25937.1|/0/hypothetical protein PDE_00873 [Penicillium oxalicum 114-2]
PDE_00881	1650	3.24333	69.0567	4.41223	Up	0.9191	K15196|1|2e-65|250|afv:AFLA_020970|transcription factor IIIB 90 kDa subunit;K08139|2|3e-64|246|dha:DEHA2C11374g|MFS transporter, SP family, sugar:H+ symporter;K00382|3|9e-56|218|abe:ARB_02522|dihydrolipoamide dehydrogenase [EC:1.8.1.4]	GO:0031224//intrinsic component of membrane	GO:0022857//transmembrane transporter activity	GO:0044765//single-organism transport;GO:0044763	gi|525579695|gb|EPS25945.1|/0/hypothetical protein PDE_00881 [Penicillium oxalicum 114-2]
PDE_00886	854	138.137	31.5767	-2.12917	Down	0.916258	K00993|1|3e-08|59.7|mbe:MBM_03974|ethanolaminephosphotransferase [EC:2.7.8.1]	-	-	-	gi|525579700|gb|EPS25950.1|/3.88493e-66/hypothetical protein PDE_00886 [Penicillium oxalicum 114-2]
PDE_00890	1140	10.3033	37.4433	1.8616	Up	0.813525	-	-	-	-	gi|525579704|gb|EPS25954.1|/0/hypothetical protein PDE_00890 [Penicillium oxalicum 114-2]
PDE_00895	1830	87.8933	201.483	1.19683	Up	0.848717	K09202|1|1e-18|95.5|maw:MAC_04654|regulatory protein SWI5	-	-	-	gi|525579709|gb|EPS25959.1|/0/hypothetical protein PDE_00895 [Penicillium oxalicum 114-2]
PDE_00897	1653	354.31	45.4367	-2.96308	Down	0.953049	-	-	-	-	gi|525579711|gb|EPS25961.1|/1.96223e-137/hypothetical protein PDE_00897 [Penicillium oxalicum 114-2]
PDE_00928	1401	33.6933	174.903	2.37602	Up	0.929991	K01758|1|9e-175|550|pcs:Pc21g05430|cystathionine gamma-lyase [EC:4.4.1.1]	-	GO:0043168//anion binding;GO:0016846//carbon-sulfur lyase activity	GO:0019344//cysteine biosynthetic process	gi|525579742|gb|EPS25992.1|/0/hypothetical protein PDE_00928 [Penicillium oxalicum 114-2]
PDE_00932	1822	0.633333	41.1	6.02003	Up	0.897437	K17645|1|2e-25|97.8|ani:AN7818.2|averantin hydroxylase [EC:1.14.13.174];K07824|3|2e-24|114|bsc:COCSADRAFT_120080|benzoate 4-monooxygenase [EC:1.14.13.12]	-	GO:0046914//transition metal ion binding;GO:0016491//oxidoreductase activity;GO:0046906//tetrapyrrole binding	GO:0044710	gi|525579746|gb|EPS25996.1|/0/hypothetical protein PDE_00932 [Penicillium oxalicum 114-2]
PDE_00936	3874	48.7467	17.06	-1.51469	Down	0.81019	K10395|1|2e-13|79.3|dsq:DICSQDRAFT_152139|kinesin family member 4/21/27;K20361|3|8e-11|70.9|cdu:CD36_44940|intracellular protein transport protein USO1	-	-	-	gi|525579750|gb|EPS26000.1|/0/hypothetical protein PDE_00936 [Penicillium oxalicum 114-2]
PDE_00948	1008	5.03	27.91	2.47215	Up	0.806889	K06653|1|5e-16|85.9|mpr:MPER_10989|CDK inhibitor PHO81;K10380|2|5e-16|85.9|maj:MAA_08755|ankyrin	-	-	-	gi|525579762|gb|EPS26012.1|/0/hypothetical protein PDE_00948 [Penicillium oxalicum 114-2]
PDE_00965	1577	2.86667	26.1767	3.19084	Up	0.817252	K01443|1|9e-135|481|pcs:Pc22g10010|N-acetylglucosamine-6-phosphate deacetylase [EC:3.5.1.25]	-	GO:0016811//hydrolase activity, acting on carbon-nitrogen (but not peptide) bonds, in linear amides	GO:0044238//primary metabolic process;GO:1901071	gi|525579779|gb|EPS26029.1|/5.28646e-159/putative N-acetyl-glucosamine-6-phosphate deacetylase [Penicillium oxalicum 114-2]
PDE_00968	1664	44.6267	174.78	1.96956	Up	0.915731	K00130|1|6e-169|594|pcs:Pc22g10030|betaine-aldehyde dehydrogenase [EC:1.2.1.8]	-	GO:0016903//oxidoreductase activity, acting on the aldehyde or oxo group of donors	GO:0044710	gi|525579782|gb|EPS26032.1|/0/hypothetical protein PDE_00968 [Penicillium oxalicum 114-2]
PDE_00999	1217	0.48	20.2533	5.39898	Up	0.813151	-	-	-	-	gi|525579813|gb|EPS26063.1|/0/hypothetical protein PDE_00999 [Penicillium oxalicum 114-2]
PDE_01002	981	97.7333	245.727	1.33013	Up	0.872847	K00140|1|3e-21|103|ela:UCREL1_8069|malonate-semialdehyde dehydrogenase (acetylating) / methylmalonate-semialdehyde dehydrogenase [EC:1.2.1.18 1.2.1.27]	-	GO:0036094//small molecule binding	-	gi|525579816|gb|EPS26066.1|/2.1806e-177/hypothetical protein PDE_01002 [Penicillium oxalicum 114-2]
PDE_01017	967	17.83	58.7667	1.72069	Up	0.847458	K01867|1|7e-22|105|ttt:THITE_2155551|tryptophanyl-tRNA synthetase [EC:6.1.1.2]	-	-	-	gi|525579831|gb|EPS26081.1|/9.848e-66/hypothetical protein PDE_01017 [Penicillium oxalicum 114-2]
PDE_01061	1213	18.5467	60.76	1.71196	Up	0.849449	K08658|1|5e-90|216|ure:UREG_03101|prenyl protein peptidase [EC:3.4.22.-];K01869|3|4e-34|146|pte:PTT_19524|leucyl-tRNA synthetase [EC:6.1.1.4]	-	-	-	gi|525579875|gb|EPS26125.1|/0/hypothetical protein PDE_01061 [Penicillium oxalicum 114-2]
PDE_01080	1445	69.48	156.567	1.17211	Up	0.836379	K00122|1|3e-155|548|pcs:Pc12g04310|formate dehydrogenase [EC:1.2.1.2]	-	GO:0016614//oxidoreductase activity, acting on CH-OH group of donors;GO:0016620//oxidoreductase activity, acting on the aldehyde or oxo group of donors, NAD or NADP as acceptor;GO:0000166//nucleotide binding	GO:0044710	gi|525579894|gb|EPS26144.1|/1.32451e-161/hypothetical protein PDE_01080 [Penicillium oxalicum 114-2]
PDE_01090	749	201.993	95	-1.08831	Down	0.829777	-	GO:0044424	-	GO:0006412//translation	gi|169776981|ref|XP_001822956.1|/3.33296e-83/Hsp70 nucleotide exchange factor fes1 [Aspergillus oryzae RIB40]
PDE_01095	1805	5.78667	64.4467	3.4773	Up	0.905231	K01952|1|7e-116|418|pno:SNOG_10851|phosphoribosylformylglycinamidine synthase [EC:6.3.5.3];K14708|2|4e-102|372|cmt:CCM_00881|solute carrier family 26 (sodium-independent sulfate anion transporter), member 11;K10866|3|4e-53|210|nhe:NECHADRAFT_65858|DNA repair protein RAD50 [EC:3.6.-.-];K13095|4|2e-49|197|fgr:FGSG_02080|splicing factor 1;K08197|5|4e-11|70.5|cgi:CGB_A9320W|MFS transporter, SIT famil…	GO:0031224//intrinsic component of membrane	-	GO:0044763	gi|525579909|gb|EPS26159.1|/0/hypothetical protein PDE_01095 [Penicillium oxalicum 114-2]
PDE_01110	1339	16.1733	105.473	2.70519	Up	0.919287	K01952|1|5e-41|90.1|pte:PTT_12605|phosphoribosylformylglycinamidine synthase [EC:6.3.5.3]	-	-	-	gi|525579924|gb|EPS26174.1|/0/hypothetical protein PDE_01110 [Penicillium oxalicum 114-2]
PDE_01111	1789	18.1067	73.8467	2.02801	Up	0.882224	K01900|1|5e-120|379|aor:AOR_1_610144|succinyl-CoA synthetase beta subunit [EC:6.2.1.4 6.2.1.5]	-	GO:0043167//ion binding	-	gi|525579925|gb|EPS26175.1|/0/hypothetical protein PDE_01111 [Penicillium oxalicum 114-2]
PDE_01118	1253	17.2533	769.073	5.47817	Up	0.98123	-	-	-	-	gi|525579932|gb|EPS26182.1|/0/hypothetical protein PDE_01118 [Penicillium oxalicum 114-2]
PDE_01119	749	1.05667	127.847	6.91875	Up	0.965404	K17623|1|4e-51|201|ure:UREG_02228|pseudouridine 5'-phosphatase [EC:3.1.3.96]	-	GO:0008324//cation transmembrane transporter activity	GO:0006812//cation transport;GO:0044763	gi|525579933|gb|EPS26183.1|/2.03696e-117/hypothetical protein PDE_01119 [Penicillium oxalicum 114-2]
PDE_01142	205	56.62	15.1467	-1.90231	Down	0.855337	-	-	-	-	gi|525579956|gb|EPS26206.1|/3.49763e-15/hypothetical protein PDE_01142 [Penicillium oxalicum 114-2]
PDE_01143	394	324.213	153.743	-1.07642	Down	0.836737	-	-	-	-	gi|525579957|gb|EPS26207.1|/5.22693e-49/hypothetical protein PDE_01143 [Penicillium oxalicum 114-2]
PDE_01166	1023	137.313	418.373	1.60732	Up	0.912702	K00344|1|2e-96|352|afm:AFUA_3G13610|NADPH2:quinone reductase [EC:1.6.5.5];K01178|2|6e-37|155|abe:ARB_02327|glucoamylase [EC:3.2.1.3];K18980|4|2e-16|87.0|cci:CC1G_13975|2-methylene-furan-3-one reductase [EC:1.3.1.105];K01113|5|1e-15|84.7|bor:COCMIDRAFT_39422|alkaline phosphatase D [EC:3.1.3.1]	-	GO:0046914//transition metal ion binding;GO:0036094//small molecule binding;GO:0003824//catalytic activity	GO:0044710	gi|525579980|gb|EPS26230.1|/0/hypothetical protein PDE_01166 [Penicillium oxalicum 114-2]
PDE_01187	1614	336.123	1563.96	2.21814	Up	0.950174	K08165|1|1e-72|275|kaf:KAFR_0B03930|MFS transporter, DHA2 family, multidrug resistance protein	GO:0031224//intrinsic component of membrane	-	GO:0044763	gi|525580001|gb|EPS26251.1|/0/hypothetical protein PDE_01187 [Penicillium oxalicum 114-2]
PDE_01188	1947	11.4933	311.053	4.75829	Up	0.96748	-	-	GO:0016701//oxidoreductase activity, acting on single donors with incorporation of molecular oxygen	GO:0044710	gi|849276046|dbj|GAO81747.1|/0/spore wall maturation protein DIT1 [Neosartorya udagawae]
PDE_01189	1124	12.5667	94.7	2.91376	Up	0.917909	K01101|1|1e-150|422|nfi:NFIA_043770|4-nitrophenyl phosphatase [EC:3.1.3.41]	-	GO:0042578//phosphoric ester hydrolase activity	GO:0006796//phosphate-containing compound metabolic process	gi|525580003|gb|EPS26253.1|/0/hypothetical protein PDE_01189 [Penicillium oxalicum 114-2]
PDE_01191	863	751.813	2591.48	1.78533	Up	0.933667	-	-	-	-	gi|525580005|gb|EPS26255.1|/2.19301e-137/hypothetical protein PDE_01191 [Penicillium oxalicum 114-2]
PDE_01193	1662	15.3233	173.63	3.50221	Up	0.94529	-	-	-	-	gi|525580007|gb|EPS26257.1|/0/hypothetical protein PDE_01193 [Penicillium oxalicum 114-2]
PDE_01194	848	2715.72	5708.74	1.07184	Up	0.847781	K00799|1|3e-30|79.0|ppl:POSPLDRAFT_90645|glutathione S-transferase [EC:2.5.1.18]	-	GO:0003824//catalytic activity	-	gi|525580008|gb|EPS26258.1|/2.72116e-120/hypothetical protein PDE_01194 [Penicillium oxalicum 114-2]
PDE_01195	2067	40.3	1293.49	5.00435	Up	0.979375	-	-	-	-	gi|525580009|gb|EPS26259.1|/0/hypothetical protein PDE_01195 [Penicillium oxalicum 114-2]
PDE_01196	2506	44.52	121.787	1.45183	Up	0.865496	K00573|1|2e-09|65.9|wic:J056_003711|protein-L-isoaspartate(D-aspartate) O-methyltransferase [EC:2.1.1.77]	-	-	GO:0006366//transcription from RNA polymerase II promoter	gi|525580010|gb|EPS26260.1|/0/hypothetical protein PDE_01196 [Penicillium oxalicum 114-2]
PDE_01198	1791	107.51	40.82	-1.39712	Down	0.854741	K07824|1|4e-36|90.9|bze:COCCADRAFT_104303|benzoate 4-monooxygenase [EC:1.14.13.12]	-	GO:0046872//metal ion binding;GO:0016491//oxidoreductase activity	-	gi|525580012|gb|EPS26262.1|/0/hypothetical protein PDE_01198 [Penicillium oxalicum 114-2]
PDE_01199	1239	75.6433	28.33	-1.41688	Down	0.836975	K02920|1|9e-10|65.5|act:ACLA_046760|large subunit ribosomal protein L36e;K06674|2|1e-07|43.1|bze:COCCADRAFT_40941|structural maintenance of chromosome 2	-	-	-	gi|525580013|gb|EPS26263.1|/4.31156e-107/hypothetical protein PDE_01199 [Penicillium oxalicum 114-2]
PDE_01205	1080	6.82667	37.4467	2.45558	Up	0.839885	K16066|1|5e-12|39.7|vpo:Kpol_1043p53|3-hydroxy acid dehydrogenase / malonic semialdehyde reductase [EC:1.1.1.381 1.1.1.-]	-	-	GO:0008152//metabolic process	gi|525580019|gb|EPS26269.1|/1.00918e-151/hypothetical protein PDE_01205 [Penicillium oxalicum 114-2]
PDE_01212	22098	29.73	215.243	2.85598	Up	0.943554	K18281|1|0.0|966|nfi:NFIA_093690|brevianamide F synthase	-	-	-	gi|525580026|gb|EPS26276.1|/0/hypothetical protein PDE_01212 [Penicillium oxalicum 114-2]
PDE_01213	1398	19.1267	98.77	2.36849	Up	0.909179	K12659|1|2e-24|114|clu:CLUG_04065|N-acetyl-gamma-glutamyl-phosphate reductase / acetylglutamate kinase [EC:1.2.1.38 2.7.2.8]	-	GO:0003824//catalytic activity	GO:0044237//cellular metabolic process	gi|525580027|gb|EPS26277.1|/0/hypothetical protein PDE_01213 [Penicillium oxalicum 114-2]
PDE_01215	1478	162.893	394.823	1.27728	Up	0.873545	K00826|1|4e-130|465|pcs:Pc21g10820|branched-chain amino acid aminotransferase [EC:2.6.1.42]	-	GO:0008483//transaminase activity	GO:0006520//cellular amino acid metabolic process	gi|525580029|gb|EPS26279.1|/6.13667e-162/hypothetical protein PDE_01215 [Penicillium oxalicum 114-2]
PDE_01216	1888	187.69	695.36	1.88941	Up	0.934041	K00668|1|1e-61|238|fpu:FPSE_07818|fatty acid synthase subunit beta, fungi type [EC:2.3.1.86];K07824|4|2e-28|115|pgr:PGTG_21421|benzoate 4-monooxygenase [EC:1.14.13.12]	-	GO:0046914//transition metal ion binding;GO:0016491//oxidoreductase activity;GO:0046906//tetrapyrrole binding	GO:0044710	gi|525580030|gb|EPS26280.1|/0/hypothetical protein PDE_01216 [Penicillium oxalicum 114-2]
PDE_01217	5169	67.43	410.133	2.60463	Up	0.950633	K00667|1|0.0|1931|pcs:Pc21g10840|fatty acid synthase subunit alpha, fungi type [EC:2.3.1.86]	GO:0044444//cytoplasmic part	GO:0016747//transferase activity, transferring acyl groups other than amino-acyl groups;GO:0036094//small molecule binding	GO:0008152//metabolic process	gi|525580031|gb|EPS26281.1|/0/hypothetical protein PDE_01217 [Penicillium oxalicum 114-2]
PDE_01218	5328	38.4133	184.103	2.26084	Up	0.92783	K05658|1|5e-24|115|mgr:MGG_00141|ATP-binding cassette, subfamily B (MDR/TAP), member 1 [EC:3.6.3.44]	-	GO:0017111//nucleoside-triphosphatase activity;GO:0097159//organic cyclic compound binding;GO:1901363//heterocyclic compound binding;GO:0036094//small molecule binding	GO:0009987//cellular process;GO:0051234//establishment of localization	gi|525580032|gb|EPS26282.1|/0/hypothetical protein PDE_01218 [Penicillium oxalicum 114-2]
PDE_01219	966	34.6133	147.41	2.09043	Up	0.91682	-	-	-	-	gi|525580033|gb|EPS26283.1|/4.30922e-154/hypothetical protein PDE_01219 [Penicillium oxalicum 114-2]
PDE_01220	6598	110.763	490.477	2.1467	Up	0.942448	K00668|1|0.0|3036|pcs:Pc21g10870|fatty acid synthase subunit beta, fungi type [EC:2.3.1.86]	GO:0043234//protein complex	GO:0004312//fatty acid synthase activity	GO:0006631//fatty acid metabolic process	gi|525580034|gb|EPS26284.1|/0/hypothetical protein PDE_01220 [Penicillium oxalicum 114-2]
PDE_01221	1233	307.697	963.377	1.64659	Up	0.922776	-	-	-	-	gi|525580035|gb|EPS26285.1|/7.92634e-160/hypothetical protein PDE_01221 [Penicillium oxalicum 114-2]
PDE_01222	1381	57.0733	200.86	1.8153	Up	0.912446	K06694|1|1e-14|81.6|clu:CLUG_01956|26S proteasome non-ATPase regulatory subunit 10;K12823|2|3e-12|73.9|ure:UREG_02211|ATP-dependent RNA helicase DDX5/DBP2 [EC:3.6.4.13];K16726|5|6e-12|72.8|pfj:MYCFIDRAFT_162040|ankyrin repeat domain-containing protein 17	-	-	-	gi|525580036|gb|EPS26286.1|/5.04724e-163/hypothetical protein PDE_01222 [Penicillium oxalicum 114-2]
PDE_01230	1455	50.52	15.14	-1.73849	Down	0.836294	K17866|1|4e-51|112|pan:PODANSg1509|diphthamide biosynthesis protein 2;K02835|4|2e-26|82.8|fpu:FPSE_06010|peptide chain release factor 1	GO:0031224//intrinsic component of membrane	-	GO:0044763	gi|525580044|gb|EPS26294.1|/0/hypothetical protein PDE_01230 [Penicillium oxalicum 114-2]
PDE_01231	2498	142.347	48.02	-1.5677	Down	0.884283	K14688|1|1e-30|135|cmt:CCM_08718|solute carrier family 30 (zinc transporter), member 1;K15385|2|3e-23|111|ure:UREG_06498|aspyridone synthetase trans-acting enoyl reductase;K09241|3|2e-07|59.3|pcs:Pc20g03000|transcriptional regulatory protein GAL4	-	GO:0046872//metal ion binding	GO:0006366//transcription from RNA polymerase II promoter	gi|525580045|gb|EPS26295.1|/0/hypothetical protein PDE_01231 [Penicillium oxalicum 114-2]
PDE_01232	371	394.907	59.8	-2.72329	Down	0.951637	-	-	-	-	gi|525580046|gb|EPS26296.1|/2.53017e-38/hypothetical protein PDE_01232 [Penicillium oxalicum 114-2]
PDE_01233	1694	84.6867	25.77	-1.71644	Down	0.873358	K15387|1|4e-144|394|ani:AN8410.2|FAD-dependent monooxygenase;K03380|5|1e-17|72.8|cci:CC1G_14808|phenol 2-monooxygenase [EC:1.14.13.7]	-	-	-	gi|525580047|gb|EPS26297.1|/0/hypothetical protein PDE_01233 [Penicillium oxalicum 114-2]
PDE_01234	2851	170	37.7133	-2.17239	Down	0.923746	-	-	-	-	gi|525580048|gb|EPS26298.1|/0/hypothetical protein PDE_01234 [Penicillium oxalicum 114-2]
PDE_01265	2835	3.57667	86.39	4.59418	Up	0.93188	-	-	-	GO:0044765//single-organism transport	gi|525580079|gb|EPS26329.1|/0/hypothetical protein PDE_01265 [Penicillium oxalicum 114-2]
PDE_01271	2534	85.17	177.36	1.05826	Up	0.819515	K00850|1|0.0|865|pcs:Pc12g13500|6-phosphofructokinase 1 [EC:2.7.1.11]	-	GO:0005488//binding;GO:0016740//transferase activity	GO:0044237//cellular metabolic process	gi|525580085|gb|EPS26335.1|/0/hypothetical protein PDE_01271 [Penicillium oxalicum 114-2]
PDE_01284	445	77.4	249.383	1.68796	Up	0.909553	-	-	-	-	gi|525580098|gb|EPS26348.1|/4.20504e-28/hypothetical protein PDE_01284 [Penicillium oxalicum 114-2]
PDE_01292	215	19.9667	51.8333	1.37629	Up	0.801443	-	-	-	-	gi|525580106|gb|EPS26356.1|/1.07061e-17/hypothetical protein PDE_01292 [Penicillium oxalicum 114-2]
PDE_01293	4230	30.0933	85.0933	1.4996	Up	0.853056	K19691|1|1e-27|127|cci:CC1G_13258|osomolarity two-component system, sensor histidine kinase NIK1 [EC:2.7.13.3]	-	GO:0016301//kinase activity;GO:0038023//signaling receptor activity	GO:0044238//primary metabolic process;GO:0044260;GO:0007165//signal transduction	gi|525580107|gb|EPS26357.1|/0/hypothetical protein PDE_01293 [Penicillium oxalicum 114-2]
PDE_01310	1133	21.6667	190.943	3.1396	Up	0.943367	-	-	-	-	gi|525580124|gb|EPS26374.1|/2.09407e-176/hypothetical protein PDE_01310 [Penicillium oxalicum 114-2]
PDE_01312	2166	49.7967	161.77	1.69982	Up	0.89953	K19851|1|8e-10|66.6|sce:YIR019C|flocculation protein FLO11;K20353|5|7e-06|53.5|ztr:MYCGRDRAFT_96140|COPII coat assembly protein SEC16	-	-	-	gi|525580126|gb|EPS26376.1|/0/hypothetical protein PDE_01312 [Penicillium oxalicum 114-2]
PDE_01315	1646	39.3833	5.43333	-2.85768	Down	0.856187	K01078|1|0.0|659|afm:AFUA_7G00800|acid phosphatase [EC:3.1.3.2]	-	GO:0043169//cation binding;GO:0016791//phosphatase activity	-	gi|525580129|gb|EPS26379.1|/0/hypothetical protein PDE_01315 [Penicillium oxalicum 114-2]
PDE_01316	637	56.96	123.533	1.11688	Up	0.819141	-	-	-	-	gi|525580130|gb|EPS26380.1|/9.14602e-46/hypothetical protein PDE_01316 [Penicillium oxalicum 114-2]
PDE_01321	1135	19.2867	68.9133	1.83718	Up	0.867759	K07889|1|4e-24|112|cdu:CD36_13070|Ras-related protein Rab-5C	-	GO:0036094//small molecule binding;GO:1901363//heterocyclic compound binding;GO:0097159//organic cyclic compound binding	-	gi|525580135|gb|EPS26385.1|/8.79091e-160/hypothetical protein PDE_01321 [Penicillium oxalicum 114-2]
PDE_01330	498	39.4233	2.45	-4.0082	Down	0.873732	K01167|1|1e-44|179|afm:AFUA_4G03230|ribonuclease T1 [EC:3.1.27.3];K16639|2|6e-06|50.4|mgl:MGL_3972|ribonuclease&#160;clavin/mitogillin [EC:3.1.27.-]	-	GO:0004540//ribonuclease activity;GO:0004519//endonuclease activity;GO:0003676//nucleic acid binding	-	gi|525580144|gb|EPS26394.1|/1.93648e-65/hypothetical protein PDE_01330 [Penicillium oxalicum 114-2]
PDE_01332	2565	20.1433	157.833	2.97003	Up	0.936951	K07300|1|4e-159|562|act:ACLA_055230|Ca2+:H+ antiporter	-	-	-	gi|525580146|gb|EPS26396.1|/0/hypothetical protein PDE_01332 [Penicillium oxalicum 114-2]
PDE_01334	1545	105.377	33.2467	-1.66427	Down	0.881152	-	-	-	-	gi|525580148|gb|EPS26398.1|/0/hypothetical protein PDE_01334 [Penicillium oxalicum 114-2]
PDE_01341	534	222.117	1602.82	2.85123	Up	0.961473	-	-	-	-	-
PDE_01356	488	94.4833	231.2	1.29101	Up	0.865683	-	-	-	-	gi|525580170|gb|EPS26420.1|/2.01393e-45/hypothetical protein PDE_01356 [Penicillium oxalicum 114-2]
PDE_01362	372	108.73	35.12	-1.63039	Down	0.880233	-	-	-	-	gi|525580176|gb|EPS26426.1|/3.15566e-58/hypothetical protein PDE_01362 [Penicillium oxalicum 114-2]
PDE_01364	1863	11.7867	42.0567	1.83518	Up	0.824161	-	-	-	-	gi|525580177|gb|EPS26427.1|/0/hypothetical protein PDE_01364 [Penicillium oxalicum 114-2]
PDE_01374	1644	31.06	403.457	3.69928	Up	0.962086	K00135|1|2e-49|162|spo:SPAC1002.12c|succinate-semialdehyde dehydrogenase / glutarate-semialdehyde dehydrogenase [EC:1.2.1.16 1.2.1.79 1.2.1.20];K00128|3|3e-49|166|afv:AFLA_050600|aldehyde dehydrogenase (NAD+) [EC:1.2.1.3]	-	GO:0016903//oxidoreductase activity, acting on the aldehyde or oxo group of donors	GO:0044710	gi|525580187|gb|EPS26437.1|/0/hypothetical protein PDE_01374 [Penicillium oxalicum 114-2]
PDE_01375	910	9.33333	88.06	3.23802	Up	0.918845	K01951|1|2e-73|180|afm:AFUA_4G03700|GMP synthase (glutamine-hydrolysing) [EC:6.3.5.2]	-	GO:0003824//catalytic activity	GO:0044710	gi|525580188|gb|EPS26438.1|/4.98769e-132/hypothetical protein PDE_01375 [Penicillium oxalicum 114-2]
PDE_01376	510	11.1433	46.2733	2.054	Up	0.846334	-	-	-	-	gi|525580189|gb|EPS26439.1|/5.58122e-95/hypothetical protein PDE_01376 [Penicillium oxalicum 114-2]
PDE_01384	3297	40.7967	237.987	2.54436	Up	0.940865	K00281|1|0.0|1720|pcs:Pc14g00390|glycine dehydrogenase [EC:1.4.4.2]	GO:0043231//intracellular membrane-bounded organelle	GO:0043168//anion binding;GO:0016642	GO:0006546//glycine catabolic process	gi|525580197|gb|EPS26447.1|/0/hypothetical protein PDE_01384 [Penicillium oxalicum 114-2]
PDE_01395	1831	38.7267	8.59333	-2.17204	Down	0.833418	K07824|1|1e-42|149|cput:CONPUDRAFT_105834|benzoate 4-monooxygenase [EC:1.14.13.12]	-	GO:0046872//metal ion binding;GO:0016491//oxidoreductase activity	-	gi|525580208|gb|EPS26458.1|/0/hypothetical protein PDE_01395 [Penicillium oxalicum 114-2]
PDE_01413	1931	16.6367	70.89	2.09122	Up	0.882513	K00108|1|5e-114|332|afm:AFUA_2G01770|choline dehydrogenase [EC:1.1.99.1]	-	GO:0016614//oxidoreductase activity, acting on CH-OH group of donors	GO:0044710	gi|525580226|gb|EPS26476.1|/0/hypothetical protein PDE_01413 [Penicillium oxalicum 114-2]
PDE_01415	723	3.62333	91.9333	4.6652	Up	0.935318	-	-	-	-	gi|525580228|gb|EPS26478.1|/2.7739e-116/hypothetical protein PDE_01415 [Penicillium oxalicum 114-2]
PDE_01424	1482	153.313	65.2533	-1.23236	Down	0.845875	-	-	-	-	gi|525580237|gb|EPS26487.1|/0/hypothetical protein PDE_01424 [Penicillium oxalicum 114-2]
PDE_01426	1939	54.0667	14.3767	-1.91101	Down	0.852444	K14338|1|1e-20|102|fpu:FPSE_08050|cytochrome P450 / NADPH-cytochrome P450 reductase [EC:1.14.14.1 1.6.2.4]	-	GO:0046914//transition metal ion binding;GO:0016491//oxidoreductase activity;GO:0046906//tetrapyrrole binding	GO:0044710	gi|525580239|gb|EPS26489.1|/0/hypothetical protein PDE_01426 [Penicillium oxalicum 114-2]
PDE_01461	3463	15.3733	72.9233	2.24595	Up	0.889354	K14554|1|0.0|812|pcs:Pc14g00830|U3 small nucleolar RNA-associated protein 21	GO:0030684//preribosome	-	GO:0042254//ribosome biogenesis	gi|525580274|gb|EPS26524.1|/0/hypothetical protein PDE_01461 [Penicillium oxalicum 114-2]
PDE_01464	603	32.2533	82.0033	1.34623	Up	0.834508	-	-	-	-	gi|525580277|gb|EPS26527.1|/1.24905e-104/hypothetical protein PDE_01464 [Penicillium oxalicum 114-2]
PDE_01465	510	73.2233	148.307	1.01821	Up	0.804727	-	-	-	-	gi|525580278|gb|EPS26528.1|/4.27339e-95/hypothetical protein PDE_01465 [Penicillium oxalicum 114-2]
PDE_01482	1069	83.57	335.023	2.0032	Up	0.931097	K00016|1|9e-85|242|mtm:MYCTH_38939|L-lactate dehydrogenase [EC:1.1.1.27]	-	GO:0016614//oxidoreductase activity, acting on CH-OH group of donors	GO:0005975//carbohydrate metabolic process	gi|525580295|gb|EPS26545.1|/2.42196e-151/hypothetical protein PDE_01482 [Penicillium oxalicum 114-2]
PDE_01503	2186	34.53	78.0667	1.17686	Up	0.805544	K01739|1|0.0|708|pcs:Pc20g08350|cystathionine gamma-synthase [EC:2.5.1.48]	-	GO:0003824//catalytic activity	-	gi|525580316|gb|EPS26566.1|/0/hypothetical protein PDE_01503 [Penicillium oxalicum 114-2]
PDE_01516	3315	11.6967	44.09	1.91435	Up	0.833589	K11273|1|0.0|689|nfi:NFIA_071590|chromosome transmission fidelity protein 1 [EC:3.6.4.13]	-	GO:0004386//helicase activity;GO:0003676//nucleic acid binding;GO:0036094//small molecule binding;GO:0042623//ATPase activity, coupled	GO:0006139//nucleobase-containing compound metabolic process	gi|525580329|gb|EPS26579.1|/0/hypothetical protein PDE_01516 [Penicillium oxalicum 114-2]
PDE_01564	2072	683.607	260.52	-1.39177	Down	0.89337	K05747|1|3e-07|58.2|pco:PHACADRAFT_147657|Wiskott-Aldrich syndrome protein;K14005|2|2e-06|55.1|maj:MAA_07654|protein transport protein SEC31;K20521|5|5e-06|53.9|spo:SPAC23A1.17|myosin tail region-interacting protein MTI1	-	-	-	gi|525580376|gb|EPS26626.1|/0/hypothetical protein PDE_01564 [Penicillium oxalicum 114-2]
PDE_01573	1487	108.557	13.65	-2.99148	Down	0.924444	K01183|1|1e-135|460|nfi:NFIA_055480|chitinase [EC:3.2.1.14]	-	GO:0004553//hydrolase activity, hydrolyzing O-glycosyl compounds	GO:0009056//catabolic process;GO:0043170	gi|525580385|gb|EPS26635.1|/0/putative chitinase [Penicillium oxalicum 114-2]
PDE_01591	2323	43.8767	98.91	1.17266	Up	0.817746	K19940|1|0.0|671|pcs:Pc20g07650|Rab guanine nucleotide exchange factor SEC2	-	-	-	gi|525580403|gb|EPS26653.1|/0/hypothetical protein PDE_01591 [Penicillium oxalicum 114-2]
PDE_01599	1214	24.0433	58.6567	1.28666	Up	0.800677	-	-	-	-	gi|525580411|gb|EPS26661.1|/2.58228e-19/hypothetical protein PDE_01599 [Penicillium oxalicum 114-2]
PDE_01621	885	9.84333	45	2.19271	Up	0.850078	K10958|1|2e-16|87.0|ani:AN1051.2|DNA repair protein RAD57	-	-	-	gi|525580433|gb|EPS26683.1|/2.09861e-173/hypothetical protein PDE_01621 [Penicillium oxalicum 114-2]
PDE_01623	2646	28.3767	125.173	2.14115	Up	0.912787	K19564|1|2e-27|82.8|bze:COCCADRAFT_9547|choline transport protein	GO:0016020//membrane	-	GO:0006865//amino acid transport	gi|525580435|gb|EPS26685.1|/3.63097e-172/hypothetical protein PDE_01623 [Penicillium oxalicum 114-2]
PDE_01627	483	112.117	15.1367	-2.88888	Down	0.924818	-	-	-	-	gi|525580439|gb|EPS26689.1|/2.08068e-58/hypothetical protein PDE_01627 [Penicillium oxalicum 114-2]
PDE_01634	2527	12.6433	56.5967	2.16234	Up	0.868695	K05857|1|2e-33|145|gtr:GLOTRDRAFT_50083|phosphatidylinositol phospholipase C, delta [EC:3.1.4.11]	-	-	-	gi|525580446|gb|EPS26696.1|/0/hypothetical protein PDE_01634 [Penicillium oxalicum 114-2]
PDE_01635	869	112.5	748.35	2.73379	Up	0.956742	-	-	-	-	gi|525580447|gb|EPS26697.1|/8.57984e-151/hypothetical protein PDE_01635 [Penicillium oxalicum 114-2]
PDE_01653	516	2.86	41.45	3.85729	Up	0.875808	-	-	-	-	gi|525580465|gb|EPS26715.1|/4.18459e-13/hypothetical protein PDE_01653 [Penicillium oxalicum 114-2]
PDE_01674	3098	2285.87	1012.01	-1.17552	Down	0.867521	K01535|1|0.0|1490|pcs:Pc15g01800|H+-transporting ATPase [EC:3.6.3.6]	GO:0031224//intrinsic component of membrane	GO:0032550;GO:0019829//cation-transporting ATPase activity;GO:0043169//cation binding	GO:0009152//purine ribonucleotide biosynthetic process;GO:0009154//purine ribonucleotide catabolic process;GO:0006811//ion transport	gi|525580485|gb|EPS26735.1|/0/hypothetical protein PDE_01674 [Penicillium oxalicum 114-2]
PDE_01682	2088	7.13	74.5733	3.38669	Up	0.91231	-	-	-	-	gi|525580493|gb|EPS26743.1|/0/hypothetical protein PDE_01682 [Penicillium oxalicum 114-2]
PDE_01683	353	9.82667	60.5433	2.62319	Up	0.887891	-	-	-	-	gi|525580494|gb|EPS26744.1|/2.10206e-47/hypothetical protein PDE_01683 [Penicillium oxalicum 114-2]
PDE_01684	2317	23.3767	87.2333	1.89981	Up	0.885525	-	-	-	-	gi|525580495|gb|EPS26745.1|/0/hypothetical protein PDE_01684 [Penicillium oxalicum 114-2]
PDE_01689	3673	102.867	358.46	1.80104	Up	0.922316	K14338|1|0.0|708|pcs:Pc20g04310|cytochrome P450 / NADPH-cytochrome P450 reductase [EC:1.14.14.1 1.6.2.4]	-	GO:0046914//transition metal ion binding;GO:0016712//oxidoreductase activity, acting on paired donors, with incorporation or reduction of molecular oxygen, reduced flavin or flavoprotein as one donor, and incorporation of one atom of oxygen;GO:0016653//oxidoreductase activity, acting on NAD(P)H, heme protein as acceptor;GO:0032553//ribonucleotide binding;GO:0046906//tetrapyrrole binding	GO:0044710	gi|525580500|gb|EPS26750.1|/0/hypothetical protein PDE_01689 [Penicillium oxalicum 114-2]
PDE_01690	1178	902.507	175.047	-2.3662	Down	0.952097	K01216|1|4e-44|179|pic:PICST_25832|licheninase [EC:3.2.1.73]	-	GO:0016787//hydrolase activity	-	gi|525580501|gb|EPS26751.1|/0/putative chitin glucanosyltransferase [Penicillium oxalicum 114-2]
PDE_01706	1134	306.137	716.387	1.22656	Up	0.871826	-	GO:0044464	GO:0097159//organic cyclic compound binding;GO:0046914//transition metal ion binding	-	gi|525580517|gb|EPS26767.1|/2.36882e-64/hypothetical protein PDE_01706 [Penicillium oxalicum 114-2]
PDE_01713	1504	78.1	35.22	-1.14893	Down	0.800252	K01455|1|0.0|526|pcs:Pc20g04820|formamidase [EC:3.5.1.49]	-	GO:0016811//hydrolase activity, acting on carbon-nitrogen (but not peptide) bonds, in linear amides	-	gi|525580524|gb|EPS26774.1|/0/hypothetical protein PDE_01713 [Penicillium oxalicum 114-2]
PDE_01746	1600	13.7267	50.5267	1.88006	Up	0.845075	K11541|1|4e-19|97.1|maw:MAC_06383|carbamoyl-phosphate synthase / aspartate carbamoyltransferase [EC:6.3.5.5 2.1.3.2]	-	-	-	gi|525580557|gb|EPS26807.1|/0/hypothetical protein PDE_01746 [Penicillium oxalicum 114-2]
PDE_01747	990	9.91333	296.283	4.90146	Up	0.967854	K13507|1|4e-62|238|tre:TRIREDRAFT_109086|glycerol-3-phosphate O-acyltransferase / dihydroxyacetone phosphate acyltransferase [EC:2.3.1.15 2.3.1.42];K08658|3|1e-20|100|ure:UREG_03101|prenyl protein peptidase [EC:3.4.22.-];K01869|4|5e-17|89.0|bze:COCCADRAFT_83059|leucyl-tRNA synthetase [EC:6.1.1.4]	-	-	-	gi|525580558|gb|EPS26808.1|/1.59083e-167/hypothetical protein PDE_01747 [Penicillium oxalicum 114-2]
PDE_01749	3146	31.3733	101.237	1.69012	Up	0.880828	K14688|1|2e-26|122|cmt:CCM_08718|solute carrier family 30 (zinc transporter), member 1;K15385|2|3e-15|85.5|ure:UREG_06498|aspyridone synthetase trans-acting enoyl reductase	-	GO:0005488//binding	GO:0006351//transcription, DNA-templated	gi|525580560|gb|EPS26810.1|/0/hypothetical protein PDE_01749 [Penicillium oxalicum 114-2]
PDE_01752	968	105.413	28.82	-1.87092	Down	0.893472	K06911|1|2e-136|290|pcs:Pc13g13510|uncharacterized protein	-	-	-	gi|525580563|gb|EPS26813.1|/4.37924e-160/hypothetical protein PDE_01752 [Penicillium oxalicum 114-2]
PDE_01767	551	84.1333	28.29	-1.57239	Down	0.860459	-	-	-	-	gi|525580578|gb|EPS26828.1|/3.30454e-60/hypothetical protein PDE_01767 [Penicillium oxalicum 114-2]
PDE_01793	2326	24.4133	85.62	1.81028	Up	0.879314	K08158|1|6e-19|97.1|pgu:PGUG_04949|MFS transporter, DHA1 family, multidrug resistance protein	-	-	-	gi|525580603|gb|EPS26853.1|/0/hypothetical protein PDE_01793 [Penicillium oxalicum 114-2]
PDE_01802	1346	35.21	10.0833	-1.80401	Down	0.802532	K16261|1|2e-52|114|nhe:NECHADRAFT_52243|yeast amino acid transporter	-	-	-	gi|525580612|gb|EPS26862.1|/0/hypothetical protein PDE_01802 [Penicillium oxalicum 114-2]
PDE_01828	1795	516.01	186.523	-1.46804	Down	0.89902	K00589|1|0.0|695|pcs:Pc20g03160|uroporphyrin-III C-methyltransferase [EC:2.1.1.107]	-	GO:0036094//small molecule binding;GO:0016628//oxidoreductase activity, acting on the CH-CH group of donors, NAD or NADP as acceptor;GO:0008169//C-methyltransferase activity	GO:0006783//heme biosynthetic process	gi|525580638|gb|EPS26888.1|/0/hypothetical protein PDE_01828 [Penicillium oxalicum 114-2]
PDE_01851	847	555.743	185.48	-1.58316	Down	0.913059	-	-	-	-	gi|525580661|gb|EPS26911.1|/7.84085e-90/hypothetical protein PDE_01851 [Penicillium oxalicum 114-2]
PDE_01856	2972	32.4467	121.87	1.9092	Up	0.901232	K00698|1|0.0|1258|pcs:Pc20g05060|chitin synthase [EC:2.4.1.16]	-	GO:0008375//acetylglucosaminyltransferase activity	GO:0006023	gi|525580666|gb|EPS26916.1|/0/putative chitin synthase [Penicillium oxalicum 114-2]
PDE_01860	2023	44.6733	129.597	1.53654	Up	0.877459	K15178|1|4e-147|330|pcs:Pc20g05030|RNA polymerase-associated protein RTF1	-	-	-	gi|525580670|gb|EPS26920.1|/0/hypothetical protein PDE_01860 [Penicillium oxalicum 114-2]
PDE_01899	2316	65.7767	172.817	1.39359	Up	0.871571	K00031|1|6e-177|617|pcs:Pc20g03610|isocitrate dehydrogenase [EC:1.1.1.42]	-	GO:0046872//metal ion binding;GO:0004448//isocitrate dehydrogenase activity;GO:0000166//nucleotide binding	GO:0009060//aerobic respiration;GO:0072350//tricarboxylic acid metabolic process	gi|525580709|gb|EPS26959.1|/0/hypothetical protein PDE_01899 [Penicillium oxalicum 114-2]
PDE_01907	1402	123.973	16.99	-2.86727	Down	0.928596	-	-	-	-	gi|525580717|gb|EPS26967.1|/1.32927e-146/hypothetical protein PDE_01907 [Penicillium oxalicum 114-2]
PDE_01913	1970	215.093	42.7667	-2.3304	Down	0.933531	K10866|1|3e-115|338|nhe:NECHADRAFT_65858|DNA repair protein RAD50 [EC:3.6.-.-];K13095|3|2e-72|274|fgr:FGSG_02080|splicing factor 1;K01952|5|1e-19|99.0|pno:SNOG_10851|phosphoribosylformylglycinamidine synthase [EC:6.3.5.3]	-	-	-	gi|525580723|gb|EPS26973.1|/0/hypothetical protein PDE_01913 [Penicillium oxalicum 114-2]
PDE_01916	2924	25.2033	1.05333	-4.58058	Down	0.832142	K14950|1|3e-11|72.0|cput:CONPUDRAFT_91722|cation-transporting ATPase 13A1 [EC:3.6.3.-]	-	-	-	gi|700448123|gb|KGO38408.1|/0/Oligopeptide transporter OPT superfamily [Penicillium expansum]
PDE_01918	746	116.74	46.2533	-1.33567	Down	0.85195	-	-	-	-	gi|525580728|gb|EPS26978.1|/8.05102e-61/hypothetical protein PDE_01918 [Penicillium oxalicum 114-2]
PDE_01919	1968	42.9567	121.247	1.49699	Up	0.870193	K09265|1|9e-156|454|pcs:Pc20g03270|transcription factor RLM1	-	-	-	gi|525580729|gb|EPS26979.1|/0/hypothetical protein PDE_01919 [Penicillium oxalicum 114-2]
PDE_01922	876	6.28	33.69	2.42348	Up	0.827871	-	-	-	-	gi|525580732|gb|EPS26982.1|/5.32301e-121/hypothetical protein PDE_01922 [Penicillium oxalicum 114-2]
PDE_01953	1179	66.4133	26.0933	-1.34779	Down	0.81943	K10675|1|7e-62|238|bsc:COCSADRAFT_33935|cyanide hydratase [EC:4.2.1.66]	-	GO:0016787//hydrolase activity	-	gi|525580762|gb|EPS27012.1|/1.87285e-176/hypothetical protein PDE_01953 [Penicillium oxalicum 114-2]
PDE_01957	1575	70.4033	144.393	1.03629	Up	0.808931	-	-	-	-	gi|525580766|gb|EPS27016.1|/0/hypothetical protein PDE_01957 [Penicillium oxalicum 114-2]
PDE_01971	2589	119.047	18.47	-2.68827	Down	0.923916	-	-	-	-	gi|525580780|gb|EPS27030.1|/0/hypothetical protein PDE_01971 [Penicillium oxalicum 114-2]
PDE_01987	663	265.53	594.703	1.1633	Up	0.85874	-	-	-	-	gi|525580796|gb|EPS27046.1|/1.83657e-89/hypothetical protein PDE_01987 [Penicillium oxalicum 114-2]
PDE_02001	1257	43.3967	95.67	1.14048	Up	0.810956	K03644|1|0.0|641|act:ACLA_034510|lipoyl synthase [EC:2.8.1.8]	GO:0043231//intracellular membrane-bounded organelle	GO:0043169//cation binding;GO:0016783//sulfurtransferase activity;GO:0051536//iron-sulfur cluster binding	GO:0006633//fatty acid biosynthetic process;GO:0018065//protein-cofactor linkage	gi|525580810|gb|EPS27060.1|/0/hypothetical protein PDE_02001 [Penicillium oxalicum 114-2]
PDE_02063	2203	4.86333	53.3733	3.4561	Up	0.892196	K20457|1|9e-41|169|aje:HCAG_03334|dihydrofolate synthase [EC:6.3.2.12]	-	-	-	gi|525580871|gb|EPS27121.1|/0/hypothetical protein PDE_02063 [Penicillium oxalicum 114-2]
PDE_02064	924	15.3433	102.767	2.74369	Up	0.918556	-	-	-	-	gi|525580872|gb|EPS27122.1|/2.19757e-46/hypothetical protein PDE_02064 [Penicillium oxalicum 114-2]
PDE_02073	1928	106.587	21.9233	-2.28149	Down	0.909639	K19564|1|3e-51|133|ang:ANI_1_326134|choline transport protein	GO:0031224//intrinsic component of membrane	GO:0046943//carboxylic acid transmembrane transporter activity	GO:0006865//amino acid transport	gi|525580881|gb|EPS27131.1|/7.82369e-147/hypothetical protein PDE_02073 [Penicillium oxalicum 114-2]
PDE_02074	1619	27.8167	0.93	-4.90258	Down	0.847492	-	-	-	-	gi|525580882|gb|EPS27132.1|/8.65074e-80/hypothetical protein PDE_02074 [Penicillium oxalicum 114-2]
PDE_02090	1226	50.88	142.387	1.48464	Up	0.873834	K01754|1|4e-153|419|afm:AFUA_3G14470|threonine dehydratase [EC:4.3.1.19]	-	-	-	gi|859265065|emb|CEJ57490.1|/5.53801e-167/Putative Threonine dehydratase [Penicillium brasilianum]
PDE_02091	1272	1360.35	2780.11	1.03116	Up	0.837434	K00053|1|0.0|689|pcs:Pc13g15810|ketol-acid reductoisomerase [EC:1.1.1.86]	-	GO:0016616//oxidoreductase activity, acting on the CH-OH group of donors, NAD or NADP as acceptor;GO:0048037//cofactor binding	GO:0008652//cellular amino acid biosynthetic process	gi|525580898|gb|EPS27148.1|/0/hypothetical protein PDE_02091 [Penicillium oxalicum 114-2]
PDE_02104	2559	16.0167	138.787	3.11522	Up	0.93462	-	-	-	-	gi|525580911|gb|EPS27161.1|/0/hypothetical protein PDE_02104 [Penicillium oxalicum 114-2]
PDE_02123	1362	19.42	0.08	-7.92333	Down	0.824382	K17649|1|2e-48|193|afv:AFLA_139220|demethylsterigmatocystin 6-O-methyltransferase [EC:2.1.1.109]	-	GO:0008168//methyltransferase activity	GO:0008152//metabolic process	gi|525580930|gb|EPS27180.1|/0/hypothetical protein PDE_02123 [Penicillium oxalicum 114-2]
PDE_02167	2264	15.0767	90.36	2.58337	Up	0.910728	K00232|1|0.0|742|afv:AFLA_077250|acyl-CoA oxidase [EC:1.3.3.6]	GO:0042579//microbody	GO:0016634//oxidoreductase activity, acting on the CH-CH group of donors, oxygen as acceptor;GO:0000166//nucleotide binding	GO:0009062//fatty acid catabolic process	gi|525580974|gb|EPS27224.1|/0/hypothetical protein PDE_02167 [Penicillium oxalicum 114-2]
PDE_02168	1990	3.06667	26.5067	3.11161	Up	0.816537	K08139|1|5e-46|186|dha:DEHA2C11374g|MFS transporter, SP family, sugar:H+ symporter	GO:0031224//intrinsic component of membrane	GO:0022857//transmembrane transporter activity	GO:0044765//single-organism transport;GO:0044763	gi|525580975|gb|EPS27225.1|/0/hypothetical protein PDE_02168 [Penicillium oxalicum 114-2]
PDE_02193	1292	45.2033	9.5	-2.25043	Down	0.852103	K19245|1|1e-169|556|ang:ANI_1_186064|sulfonate dioxygenase [EC:1.14.11.-]	-	GO:0016701//oxidoreductase activity, acting on single donors with incorporation of molecular oxygen;GO:0016706//oxidoreductase activity, acting on paired donors, with incorporation or reduction of molecular oxygen, 2-oxoglutarate as one donor, and incorporation of one atom each of oxygen into both donors	GO:0044710	gi|525581000|gb|EPS27250.1|/0/hypothetical protein PDE_02193 [Penicillium oxalicum 114-2]
PDE_02196	1413	410.86	139.217	-1.56131	Down	0.906473	K11885|1|5e-153|541|pcs:Pc20g01270|DNA damage-inducible protein 1	-	-	-	gi|525581003|gb|EPS27253.1|/4.11707e-176/hypothetical protein PDE_02196 [Penicillium oxalicum 114-2]
PDE_02247	4167	39.77	149.867	1.91393	Up	0.90889	K05658|1|0.0|1995|pcs:Pc20g01220|ATP-binding cassette, subfamily B (MDR/TAP), member 1 [EC:3.6.3.44]	GO:0031224//intrinsic component of membrane	GO:0017111//nucleoside-triphosphatase activity;GO:0032550;GO:0015405	GO:0009154//purine ribonucleotide catabolic process;GO:0044763;GO:0051234//establishment of localization	gi|525581054|gb|EPS27304.1|/0/hypothetical protein PDE_02247 [Penicillium oxalicum 114-2]
PDE_02263	192	467.267	232.25	-1.00857	Down	0.824178	-	-	-	-	gi|525581070|gb|EPS27320.1|/4.77263e-30/hypothetical protein PDE_02263 [Penicillium oxalicum 114-2]
PDE_02299	1365	17.03	61.2933	1.84765	Up	0.859557	K13989|1|1e-30|135|act:ACLA_008980|Derlin-2/3	-	-	-	gi|525581106|gb|EPS27356.1|/4.96807e-70/hypothetical protein PDE_02299 [Penicillium oxalicum 114-2]
PDE_02311	2052	22.43	69.1833	1.62499	Up	0.85326	K00928|1|0.0|712|pcs:Pc20g00640|aspartate kinase [EC:2.7.2.4]	-	GO:0031406//carboxylic acid binding;GO:0016774//phosphotransferase activity, carboxyl group as acceptor	GO:0009085//lysine biosynthetic process;GO:0006566//threonine metabolic process;GO:0006796//phosphate-containing compound metabolic process	gi|525581118|gb|EPS27368.1|/0/hypothetical protein PDE_02311 [Penicillium oxalicum 114-2]
PDE_02340	1128	20.1067	107.423	2.41756	Up	0.914012	K11314|1|9e-08|58.5|cot:CORT_0A09880|transcriptional adapter 2-alpha	-	-	-	gi|525581147|gb|EPS27397.1|/0/hypothetical protein PDE_02340 [Penicillium oxalicum 114-2]
PDE_02379	1908	2820.46	1343.77	-1.06964	Down	0.846981	K03283|1|0.0|1039|pcs:Pc22g11240|heat shock 70kDa protein 1/8	-	GO:0032550	GO:0050896//response to stimulus	gi|525581186|gb|EPS27436.1|/0/hypothetical protein PDE_02379 [Penicillium oxalicum 114-2]
PDE_02417	2088	19.6933	58.2467	1.56447	Up	0.83284	K03316|1|5e-39|135|kla:KLLA0D16797g|monovalent cation:H+ antiporter, CPA1 family	-	-	GO:0044765//single-organism transport	gi|525581224|gb|EPS27474.1|/0/hypothetical protein PDE_02417 [Penicillium oxalicum 114-2]
PDE_02459	1315	47.7667	178.197	1.89939	Up	0.913587	-	-	-	-	gi|525581266|gb|EPS27516.1|/0/hypothetical protein PDE_02459 [Penicillium oxalicum 114-2]
PDE_02465	702	7.14	54.4333	2.93049	Up	0.885729	K03574|1|1e-31|109|act:ACLA_016860|8-oxo-dGTP diphosphatase [EC:3.6.1.55]	-	GO:0003824//catalytic activity	-	gi|525581272|gb|EPS27522.1|/2.75645e-50/hypothetical protein PDE_02465 [Penicillium oxalicum 114-2]
PDE_02466	1012	78.1633	470.427	2.58941	Up	0.951841	-	-	-	-	gi|525581273|gb|EPS27523.1|/3.59733e-122/hypothetical protein PDE_02466 [Penicillium oxalicum 114-2]
PDE_02468	1085	8.51667	51.1067	2.58515	Up	0.873477	-	-	-	-	gi|525581275|gb|EPS27525.1|/7.60346e-89/hypothetical protein PDE_02468 [Penicillium oxalicum 114-2]
PDE_02469	597	153.267	1185.12	2.95091	Up	0.961541	-	-	-	-	gi|525581276|gb|EPS27526.1|/1.51284e-38/hypothetical protein PDE_02469 [Penicillium oxalicum 114-2]
PDE_02490	2588	257.39	836.417	1.70027	Up	0.924699	K00820|1|0.0|1043|nfi:NFIA_051960|glucosamine--fructose-6-phosphate aminotransferase (isomerizing) [EC:2.6.1.16]	GO:0044424	GO:0005488//binding;GO:0070548	GO:0006038//cell wall chitin biosynthetic process	gi|525581297|gb|EPS27547.1|/0/hypothetical protein PDE_02490 [Penicillium oxalicum 114-2]
PDE_02505	780	1999.52	655.853	-1.60821	Down	0.921925	K13993|1|2e-09|63.5|nfi:NFIA_077000|HSP20 family protein	-	-	-	gi|525581312|gb|EPS27562.1|/3.22537e-108/hypothetical protein PDE_02505 [Penicillium oxalicum 114-2]
PDE_02511	544	12.2233	55.6067	2.18562	Up	0.868117	-	-	-	-	gi|525581318|gb|EPS27568.1|/3.90843e-82/hypothetical protein PDE_02511 [Penicillium oxalicum 114-2]
PDE_02512	2580	25.9167	80.69	1.63851	Up	0.865377	-	-	-	GO:0006351//transcription, DNA-templated	gi|525581319|gb|EPS27569.1|/0/hypothetical protein PDE_02512 [Penicillium oxalicum 114-2]
PDE_02513	1840	54.5667	6.09667	-3.16193	Down	0.889116	K08176|1|2e-09|65.1|pco:PHACADRAFT_265625|MFS transporter, PHS family, inorganic phosphate transporter	-	-	-	gi|525581320|gb|EPS27570.1|/0/hypothetical protein PDE_02513 [Penicillium oxalicum 114-2]
PDE_02575	1156	13.32	73.9467	2.47289	Up	0.896705	-	-	-	-	gi|849276634|dbj|GAO81073.1|/1.03348e-104/hypothetical protein AUD_0033 [Neosartorya udagawae]
PDE_02582	213	165.94	75.6233	-1.13376	Down	0.831087	-	-	-	-	gi|525581388|gb|EPS27638.1|/1.19343e-33/hypothetical protein PDE_02582 [Penicillium oxalicum 114-2]
PDE_02589	1351	20.14	54.73	1.44227	Up	0.814002	-	-	-	-	gi|525581395|gb|EPS27645.1|/4.53437e-100/hypothetical protein PDE_02589 [Penicillium oxalicum 114-2]
PDE_02594	687	51.6067	162.29	1.65294	Up	0.896978	K06867|1|2e-17|60.8|sce:YGL242C|uncharacterized protein	-	-	-	gi|525581400|gb|EPS27650.1|/2.85359e-77/hypothetical protein PDE_02594 [Penicillium oxalicum 114-2]
PDE_02595	633	23.4233	103.203	2.13947	Up	0.904516	K03019|1|8e-45|118|afv:AFLA_090770|DNA-directed RNA polymerase III subunit RPC11	-	GO:0046872//metal ion binding;GO:0003676//nucleic acid binding	-	gi|525581401|gb|EPS27651.1|/1.03268e-53/hypothetical protein PDE_02595 [Penicillium oxalicum 114-2]
PDE_02600	7687	37.52	11.56	-1.69852	Down	0.802243	K20361|1|1e-27|127|ctp:CTRG_03890|intracellular protein transport protein USO1	-	-	-	gi|525581406|gb|EPS27656.1|/0/hypothetical protein PDE_02600 [Penicillium oxalicum 114-2]
PDE_02671	1441	71.3	408.287	2.51761	Up	0.948846	-	-	-	-	gi|525581477|gb|EPS27727.1|/3.95792e-174/hypothetical protein PDE_02671 [Penicillium oxalicum 114-2]
PDE_02703	312	1042.01	159.093	-2.71142	Down	0.95824	-	-	-	-	gi|525581509|gb|EPS27759.1|/2.3029e-56/hypothetical protein PDE_02703 [Penicillium oxalicum 114-2]
PDE_02704	1659	434.593	100.013	-2.11947	Down	0.940082	K09529|1|3e-13|77.4|spo:SPAC1071.09c|DnaJ homolog subfamily C member 9	-	-	-	gi|525581510|gb|EPS27760.1|/0/hypothetical protein PDE_02704 [Penicillium oxalicum 114-2]
PDE_02721	674	3213.04	719.583	-2.15871	Down	0.950106	-	-	-	-	gi|525581527|gb|EPS27777.1|/1.47635e-33/hypothetical protein PDE_02721 [Penicillium oxalicum 114-2]
PDE_02730	1350	24.4967	61.93	1.33805	Up	0.812947	-	-	-	GO:0009636//response to toxic substance	gi|525581536|gb|EPS27786.1|/0/hypothetical protein PDE_02730 [Penicillium oxalicum 114-2]
PDE_02746	2154	48.39	113.913	1.23516	Up	0.836005	-	-	-	-	gi|525581552|gb|EPS27802.1|/0/hypothetical protein PDE_02746 [Penicillium oxalicum 114-2]
PDE_02749	1008	81.2133	381.833	2.23315	Up	0.941171	K00799|1|7e-10|65.5|fpu:FPSE_10852|glutathione S-transferase [EC:2.5.1.18]	-	-	-	gi|525581555|gb|EPS27805.1|/1.6968e-108/hypothetical protein PDE_02749 [Penicillium oxalicum 114-2]
PDE_02763	1487	275.257	567.97	1.04504	Up	0.837145	K00606|1|1e-42|174|wic:J056_003735|3-methyl-2-oxobutanoate hydroxymethyltransferase [EC:2.1.2.11]	GO:0031224//intrinsic component of membrane	-	-	gi|525581569|gb|EPS27819.1|/0/hypothetical protein PDE_02763 [Penicillium oxalicum 114-2]
PDE_02765	1806	51.6033	14.4733	-1.83407	Down	0.844122	-	-	-	-	gi|525581571|gb|EPS27821.1|/0/hypothetical protein PDE_02765 [Penicillium oxalicum 114-2]
PDE_02766	429	70.02	25.8	-1.4404	Down	0.833844	-	-	-	-	gi|525581572|gb|EPS27822.1|/3.53225e-65/hypothetical protein PDE_02766 [Penicillium oxalicum 114-2]
PDE_02797	1606	127.627	48.48	-1.39647	Down	0.861837	K01078|1|2e-164|320|nfi:NFIA_021090|acid phosphatase [EC:3.1.3.2]	-	GO:0016787//hydrolase activity	-	gi|525581603|gb|EPS27853.1|/0/hypothetical protein PDE_02797 [Penicillium oxalicum 114-2]
PDE_02816	2153	17.1833	61.8733	1.84831	Up	0.860204	K10866|1|1e-06|56.2|nhe:NECHADRAFT_65858|DNA repair protein RAD50 [EC:3.6.-.-]	-	-	-	gi|525581622|gb|EPS27872.1|/0/hypothetical protein PDE_02816 [Penicillium oxalicum 114-2]
PDE_02854	865	22.4933	77.4467	1.78371	Up	0.871945	-	-	-	-	gi|525581660|gb|EPS27910.1|/1.33205e-124/hypothetical protein PDE_02854 [Penicillium oxalicum 114-2]
PDE_02866	665	94.4267	412.217	2.12614	Up	0.939759	-	-	-	-	gi|525581672|gb|EPS27922.1|/9.89775e-35/hypothetical protein PDE_02866 [Penicillium oxalicum 114-2]
PDE_02867	974	282.837	1654.63	2.54847	Up	0.957389	-	-	-	-	gi|525581673|gb|EPS27923.1|/1.43726e-64/hypothetical protein PDE_02867 [Penicillium oxalicum 114-2]
PDE_02880	1287	181.587	40.2033	-2.17527	Down	0.92572	-	-	-	-	gi|525581686|gb|EPS27936.1|/2.50693e-177/hypothetical protein PDE_02880 [Penicillium oxalicum 114-2]
PDE_02940	1577	32.3233	98.4433	1.60672	Up	0.873358	K00467|1|7e-132|341|afm:AFUA_4G07050|lactate 2-monooxygenase [EC:1.13.12.4];K11517|5|2e-39|93.2|pfj:MYCFIDRAFT_62645|(S)-2-hydroxy-acid oxidase [EC:1.1.3.15]	-	GO:0003824//catalytic activity;GO:0032553//ribonucleotide binding	GO:0044710	gi|525581745|gb|EPS27995.1|/0/hypothetical protein PDE_02940 [Penicillium oxalicum 114-2]
PDE_02957	2692	21.6667	72.6467	1.74542	Up	0.865751	K14708|1|0.0|1039|pcs:Pc16g10020|solute carrier family 26 (sodium-independent sulfate anion transporter), member 11	GO:0031224//intrinsic component of membrane	GO:0015291//secondary active transmembrane transporter activity;GO:0015103//inorganic anion transmembrane transporter activity	GO:0044763;GO:0015698//inorganic anion transport	gi|525581762|gb|EPS28012.1|/0/hypothetical protein PDE_02957 [Penicillium oxalicum 114-2]
PDE_02966	3859	87.61	181.64	1.05191	Up	0.818562	K12609|1|0.0|1078|pcs:Pc16g10280|CCR4-NOT transcriptional complex subunit CAF120	-	-	-	gi|525581771|gb|EPS28021.1|/0/hypothetical protein PDE_02966 [Penicillium oxalicum 114-2]
PDE_02981	1308	6.05	39.32	2.70026	Up	0.852478	-	-	-	-	gi|525581786|gb|EPS28036.1|/1.50505e-177/hypothetical protein PDE_02981 [Penicillium oxalicum 114-2]
PDE_03035	219	1534.07	182.717	-3.06969	Down	0.963277	-	-	-	-	gi|525581839|gb|EPS28089.1|/6.54657e-35/hypothetical protein PDE_03035 [Penicillium oxalicum 114-2]
PDE_03102	2441	59.3333	125.817	1.08441	Up	0.812828	K01702|1|0.0|1283|pcs:Pc15g00510|3-isopropylmalate dehydratase [EC:4.2.1.33]	GO:0043234//protein complex	GO:0051536//iron-sulfur cluster binding;GO:0016836//hydro-lyase activity	GO:0008652//cellular amino acid biosynthetic process;GO:0006551//leucine metabolic process	gi|525581906|gb|EPS28156.1|/0/hypothetical protein PDE_03102 [Penicillium oxalicum 114-2]
PDE_03135	1005	35.5533	98.1267	1.46466	Up	0.856647	K19952|1|2e-09|63.9|pco:PHACADRAFT_211005|guanine nucleotide exchange factor	-	GO:0016740//transferase activity	-	gi|525581939|gb|EPS28189.1|/1.17746e-141/hypothetical protein PDE_03135 [Penicillium oxalicum 114-2]
PDE_03139	315	123.587	47.2933	-1.38581	Down	0.859625	-	-	-	-	gi|525581943|gb|EPS28193.1|/6.91571e-53/hypothetical protein PDE_03139 [Penicillium oxalicum 114-2]
PDE_03147	1324	21.2933	84.01	1.98016	Up	0.886716	K00965|1|0.0|508|pcs:Pc15g00140|UDPglucose--hexose-1-phosphate uridylyltransferase [EC:2.7.7.12]	GO:0044424	GO:0046914//transition metal ion binding;GO:0070569//uridylyltransferase activity	GO:0019388//galactose catabolic process	gi|525581951|gb|EPS28201.1|/0/hypothetical protein PDE_03147 [Penicillium oxalicum 114-2]
PDE_03172	1033	6.68	64.1767	3.26413	Up	0.902202	-	-	-	-	gi|525581976|gb|EPS28226.1|/1.67235e-160/hypothetical protein PDE_03172 [Penicillium oxalicum 114-2]
PDE_03186	971	127.747	40.9833	-1.64018	Down	0.887857	-	-	-	-	gi|525581990|gb|EPS28240.1|/1.99029e-74/hypothetical protein PDE_03186 [Penicillium oxalicum 114-2]
PDE_03218	1338	138.073	37.91	-1.86478	Down	0.903683	K01213|1|2e-109|230|ttt:THITE_122351|galacturan 1,4-alpha-galacturonidase [EC:3.2.1.67]	-	GO:0016798//hydrolase activity, acting on glycosyl bonds	GO:0008152//metabolic process	gi|525582022|gb|EPS28272.1|/4.78452e-170/putative polygalacturonase [Penicillium oxalicum 114-2]
PDE_03241	1614	32.5633	74.1567	1.18733	Up	0.803366	K00818|1|0.0|618|pcs:Pc20g14810|acetylornithine aminotransferase [EC:2.6.1.11]	-	GO:0016769//transferase activity, transferring nitrogenous groups;GO:0043168//anion binding	GO:0009064//glutamine family amino acid metabolic process	gi|525582045|gb|EPS28295.1|/0/hypothetical protein PDE_03241 [Penicillium oxalicum 114-2]
PDE_03248	1731	11.1367	82.5267	2.88954	Up	0.911102	K08158|1|4e-38|160|npa:UCRNP2_1966|MFS transporter, DHA1 family, multidrug resistance protein	-	-	-	gi|525582052|gb|EPS28302.1|/0/hypothetical protein PDE_03248 [Penicillium oxalicum 114-2]
PDE_03255	444	886.38	236.073	-1.90869	Down	0.936185	K03626|1|3e-08|57.4|ppl:POSPLDRAFT_97401|nascent polypeptide-associated complex subunit alpha	-	-	-	gi|525582059|gb|EPS28309.1|/5.01535e-72/hypothetical protein PDE_03255 [Penicillium oxalicum 114-2]
PDE_03257	1365	48.01	113.183	1.23725	Up	0.835852	-	-	-	-	gi|525582061|gb|EPS28311.1|/0/hypothetical protein PDE_03257 [Penicillium oxalicum 114-2]
PDE_03280	516	29.44	93.1867	1.66235	Up	0.875111	-	-	GO:0016741	GO:0008152//metabolic process	gi|525582084|gb|EPS28334.1|/5.63303e-98/hypothetical protein PDE_03280 [Penicillium oxalicum 114-2]
PDE_03282	1179	4.82	30.57	2.66501	Up	0.82428	K00018|1|3e-116|419|afm:AFUA_6G10090|glycerate dehydrogenase [EC:1.1.1.29];K03032|2|1e-47|191|sla:SERLADRAFT_364688|26S proteasome regulatory subunit N2;K00058|3|9e-25|115|tve:TRV_00953|D-3-phosphoglycerate dehydrogenase [EC:1.1.1.95]	-	GO:0016491//oxidoreductase activity;GO:0005488//binding	-	gi|525582086|gb|EPS28336.1|/1.39216e-163/hypothetical protein PDE_03282 [Penicillium oxalicum 114-2]
PDE_03283	771	10.39	64.43	2.63254	Up	0.892485	K10437|1|8e-09|61.2|npa:UCRNP2_5654|phenylacetate 2-hydroxylase [EC:1.14.13.-];K15361|2|8e-09|61.2|pte:PTT_19170|WD repeat-containing protein 48	-	-	-	gi|525582087|gb|EPS28337.1|/3.96604e-119/hypothetical protein PDE_03283 [Penicillium oxalicum 114-2]
PDE_03286	2139	39.5967	88.4533	1.15954	Up	0.809901	K19692|1|0.0|858|pcs:Pc20g15550|osomolarity two-component system, sensor histidine kinase TcsA [EC:2.7.13.3]	-	GO:0016772//transferase activity, transferring phosphorus-containing groups;GO:0004871//signal transducer activity	GO:0006796//phosphate-containing compound metabolic process;GO:0007165//signal transduction	gi|525582090|gb|EPS28340.1|/0/hypothetical protein PDE_03286 [Penicillium oxalicum 114-2]
PDE_03287	2232	42.3967	6.79667	-2.64105	Down	0.858587	K01279|1|0.0|520|afm:AFUA_6G10250|tripeptidyl-peptidase I [EC:3.4.14.9]	GO:0005576//extracellular region	GO:0070011//peptidase activity, acting on L-amino acid peptides	-	gi|525582091|gb|EPS28341.1|/0/hypothetical protein PDE_03287 [Penicillium oxalicum 114-2]
PDE_03290	3742	125.73	37.76	-1.7354	Down	0.893472	-	-	-	-	gi|121703477|ref|XP_001270003.1|/0/conserved hypothetical protein [Aspergillus clavatus NRRL 1]
PDE_03291	1859	386.777	49.0567	-2.97898	Down	0.95436	-	-	-	-	gi|525582095|gb|EPS28345.1|/0/putative beta-1,3-glucanase [Penicillium oxalicum 114-2]
PDE_03296	780	257.357	26.83	-3.26185	Down	0.951586	-	-	GO:0003824//catalytic activity	GO:0043170	gi|525582100|gb|EPS28350.1|/2.2233e-125/putative lysozyme [Penicillium oxalicum 114-2]
PDE_03298	2420	70.8367	28.2	-1.3288	Down	0.821489	K01684|1|1e-12|76.3|ani:AN4828.2|galactonate dehydratase [EC:4.2.1.6];K09241|2|9e-10|66.6|ztr:MYCGRDRAFT_36302|transcriptional regulatory protein GAL4;K00480|3|6e-09|63.9|tre:TRIREDRAFT_112134|salicylate hydroxylase [EC:1.14.13.1]	-	GO:0046872//metal ion binding;GO:0016787//hydrolase activity	GO:0006366//transcription from RNA polymerase II promoter	gi|525582102|gb|EPS28352.1|/0/hypothetical protein PDE_03298 [Penicillium oxalicum 114-2]
PDE_03300	1392	49.4933	15.17	-1.70601	Down	0.832091	K01487|1|0.0|685|pcs:Pc20g15520|guanine deaminase [EC:3.5.4.3]	-	GO:0046914//transition metal ion binding;GO:0016814//hydrolase activity, acting on carbon-nitrogen (but not peptide) bonds, in cyclic amidines	GO:0006145//purine nucleobase catabolic process	gi|525582104|gb|EPS28354.1|/0/hypothetical protein PDE_03300 [Penicillium oxalicum 114-2]
PDE_03317	1008	7.93667	96.5033	3.60397	Up	0.927132	K00002|1|4e-36|152|tpf:TPHA_0A00140|alcohol dehydrogenase (NADP+) [EC:1.1.1.2]	-	GO:0046914//transition metal ion binding;GO:0036094//small molecule binding;GO:0016614//oxidoreductase activity, acting on CH-OH group of donors	GO:0044710	gi|525582121|gb|EPS28371.1|/0/hypothetical protein PDE_03317 [Penicillium oxalicum 114-2]
PDE_03319	1543	456.957	2.99333	-7.25416	Down	0.989262	K03380|1|8e-25|68.6|smp:SMAC_07153|phenol 2-monooxygenase [EC:1.14.13.7]	-	-	-	gi|525582123|gb|EPS28373.1|/0/hypothetical protein PDE_03319 [Penicillium oxalicum 114-2]
PDE_03320	213	32.9267	4.98667	-2.72311	Down	0.833725	-	-	-	-	-
PDE_03322	1900	123.22	30.67	-2.00634	Down	0.906371	K00485|1|8e-16|86.3|cim:CIMG_05875|dimethylaniline monooxygenase (N-oxide forming) [EC:1.14.13.8]	-	GO:0004497//monooxygenase activity;GO:0000166//nucleotide binding	-	gi|525582126|gb|EPS28376.1|/0/hypothetical protein PDE_03322 [Penicillium oxalicum 114-2]
PDE_03329	3178	366.833	116.043	-1.66046	Down	0.914846	-	-	-	-	gi|525582133|gb|EPS28383.1|/0/hypothetical protein PDE_03329 [Penicillium oxalicum 114-2]
PDE_03341	2158	40.3133	111.05	1.46188	Up	0.862518	K06657|1|3e-06|54.7|cot:CORT_0A09780|G1/S-specific cyclin PLC2	-	-	-	gi|525582145|gb|EPS28395.1|/0/hypothetical protein PDE_03341 [Penicillium oxalicum 114-2]
PDE_03369	1164	17.5367	67.1267	1.93651	Up	0.87072	K17647|1|1e-27|124|aor:AOR_1_2094|versiconal hemiacetal acetate reductase [EC:1.1.1.353];K15303|3|1e-20|101|dsq:DICSQDRAFT_109296|aflatoxin B1 aldehyde reductase	-	-	-	gi|525582173|gb|EPS28423.1|/0/hypothetical protein PDE_03369 [Penicillium oxalicum 114-2]
PDE_03382	897	749.177	1866.8	1.31719	Up	0.88869	K14171|1|8e-50|114|pcs:Pc22g23760|alkyl hydroperoxide reductase 1 [EC:1.11.1.15]	-	GO:0003824//catalytic activity	GO:0044710	gi|525582186|gb|EPS28436.1|/1.41985e-54/hypothetical protein PDE_03382 [Penicillium oxalicum 114-2]
PDE_03392	1393	31.29	107.423	1.77953	Up	0.889218	K14454|1|0.0|664|pcs:Pc22g23830|aspartate aminotransferase, cytoplasmic [EC:2.6.1.1]	-	GO:0043168//anion binding;GO:0070546	GO:0019752//carboxylic acid metabolic process	gi|525582196|gb|EPS28446.1|/0/hypothetical protein PDE_03392 [Penicillium oxalicum 114-2]
PDE_03399	2052	76.6767	5.56	-3.78563	Down	0.917926	K01078|1|0.0|640|afm:AFUA_5G01330|acid phosphatase [EC:3.1.3.2]	-	GO:0043169//cation binding;GO:0016791//phosphatase activity	-	gi|525582203|gb|EPS28453.1|/0/hypothetical protein PDE_03399 [Penicillium oxalicum 114-2]
PDE_03432	1023	37.6233	122.863	1.70735	Up	0.890545	K00287|1|8e-08|58.5|kla:KLLA0C07018g|dihydrofolate reductase [EC:1.5.1.3]	-	-	-	gi|525582236|gb|EPS28486.1|/7.9897e-85/hypothetical protein PDE_03432 [Penicillium oxalicum 114-2]
PDE_03450	2554	36.2633	2.73	-3.73154	Down	0.861871	-	-	-	GO:0044765//single-organism transport	gi|525582254|gb|EPS28504.1|/0/hypothetical protein PDE_03450 [Penicillium oxalicum 114-2]
PDE_03506	1590	44.5967	132.963	1.57602	Up	0.883551	K16075|1|1e-06|55.8|ssl:SS1G_05288|magnesium transporter	-	-	-	gi|525582310|gb|EPS28560.1|/0/hypothetical protein PDE_03506 [Penicillium oxalicum 114-2]
PDE_03518	731	108.577	45.29	-1.26145	Down	0.837162	K15361|1|2e-11|69.7|bor:COCMIDRAFT_97784|WD repeat-containing protein 48;K10437|5|2e-06|53.5|npa:UCRNP2_5654|phenylacetate 2-hydroxylase [EC:1.14.13.-]	-	-	-	gi|525582322|gb|EPS28572.1|/6.38013e-68/hypothetical protein PDE_03518 [Penicillium oxalicum 114-2]
PDE_03519	1423	176.607	84.0967	-1.07042	Down	0.821745	K18587|1|3e-16|87.0|ure:UREG_05471|ubiquinone biosynthesis protein COQ9	-	-	-	gi|525582323|gb|EPS28573.1|/0/hypothetical protein PDE_03519 [Penicillium oxalicum 114-2]
PDE_03520	2217	144.857	57.1767	-1.34113	Down	0.860374	K19564|1|3e-14|81.3|nfi:NFIA_039160|choline transport protein	-	-	-	gi|525582324|gb|EPS28574.1|/0/hypothetical protein PDE_03520 [Penicillium oxalicum 114-2]
PDE_03553	1431	32.7367	79.8867	1.28705	Up	0.824025	K15710|1|4e-09|63.5|ani:AN5773.2|E3 ubiquitin-protein ligase SHPRH [EC:3.6.4.- 2.3.2.27]	-	-	-	gi|525582357|gb|EPS28607.1|/0/hypothetical protein PDE_03553 [Penicillium oxalicum 114-2]
PDE_03554	1087	48.0933	1.68333	-4.83644	Down	0.899479	K00505|1|1e-120|349|pcs:Pc15g00990|tyrosinase [EC:1.14.18.1]	-	-	GO:0008152//metabolic process	gi|525582358|gb|EPS28608.1|/4.20917e-171/hypothetical protein PDE_03554 [Penicillium oxalicum 114-2]
PDE_03624	2261	70.9833	293.403	2.04733	Up	0.931625	-	-	-	-	gi|525582428|gb|EPS28678.1|/0/hypothetical protein PDE_03624 [Penicillium oxalicum 114-2]
PDE_03625	658	48.87	116.023	1.24739	Up	0.838626	-	-	-	-	gi|525582429|gb|EPS28679.1|/1.59561e-37/hypothetical protein PDE_03625 [Penicillium oxalicum 114-2]
PDE_03634	2409	78.2533	5.88	-3.73426	Down	0.918692	-	-	-	-	gi|525582438|gb|EPS28688.1|/0/hypothetical protein PDE_03634 [Penicillium oxalicum 114-2]
PDE_03654	1304	373.227	139.44	-1.42041	Down	0.890426	-	-	-	-	gi|525582458|gb|EPS28708.1|/3.77651e-21/hypothetical protein PDE_03654 [Penicillium oxalicum 114-2]
PDE_03701	2088	70.9333	225.01	1.66545	Up	0.906235	K00602|1|0.0|907|pcs:Pc22g19100|phosphoribosylaminoimidazolecarboxamide formyltransferase / IMP cyclohydrolase [EC:2.1.2.3 3.5.4.10]	GO:0044444//cytoplasmic part	GO:0016742//hydroxymethyl-, formyl- and related transferase activity;GO:0019238//cyclohydrolase activity	GO:0006188//IMP biosynthetic process;GO:0045333//cellular respiration;GO:0022413	gi|525582505|gb|EPS28755.1|/0/hypothetical protein PDE_03701 [Penicillium oxalicum 114-2]
PDE_03705	846	184.14	590.55	1.68126	Up	0.921534	-	-	-	-	gi|525582509|gb|EPS28759.1|/8.97109e-86/hypothetical protein PDE_03705 [Penicillium oxalicum 114-2]
PDE_03711	1717	143.86	382.01	1.40894	Up	0.889388	K01179|1|1e-128|354|nfi:NFIA_085010|endoglucanase [EC:3.2.1.4]	-	-	-	gi|525582515|gb|EPS28765.1|/0/putative endo-beta-1,4-glucanase [Penicillium oxalicum 114-2]
PDE_03718	2914	62.25	148.793	1.25716	Up	0.849619	-	-	GO:0016301//kinase activity	GO:0009987//cellular process	gi|525582522|gb|EPS28772.1|/0/hypothetical protein PDE_03718 [Penicillium oxalicum 114-2]
PDE_03722	1997	13.4133	61.27	2.19151	Up	0.876013	K11982|1|2e-08|62.0|tms:TREMEDRAFT_63337|E3 ubiquitin-protein ligase RNF115/126 [EC:2.3.2.27];K15706|3|6e-06|53.5|pco:PHACADRAFT_127496|E3 ubiquitin-protein ligase RNF167 [EC:2.3.2.27]	-	-	-	gi|525582526|gb|EPS28776.1|/3.05425e-93/hypothetical protein PDE_03722 [Penicillium oxalicum 114-2]
PDE_03742	1861	2.09333	26.9067	3.68409	Up	0.82782	K14685|1|8e-117|198|vda:VDAG_04326|solute carrier family 40 (iron-regulated transporter), member 1	-	-	-	gi|525582546|gb|EPS28796.1|/4.75731e-166/hypothetical protein PDE_03742 [Penicillium oxalicum 114-2]
PDE_03743	1064	12.1367	144.8	3.57662	Up	0.941546	-	-	-	-	gi|525582547|gb|EPS28797.1|/4.82816e-165/hypothetical protein PDE_03743 [Penicillium oxalicum 114-2]
PDE_03747	1847	91.8167	36.9067	-1.31487	Down	0.835682	K13953|1|1e-28|128|nfi:NFIA_081330|alcohol dehydrogenase, propanol-preferring [EC:1.1.1.1]	GO:0016020//membrane	GO:0015932//nucleobase-containing compound transmembrane transporter activity	GO:0015851//nucleobase transport	gi|525582551|gb|EPS28801.1|/0/hypothetical protein PDE_03747 [Penicillium oxalicum 114-2]
PDE_03776	309	26.56	311.313	3.55104	Up	0.956708	-	-	-	-	gi|525582580|gb|EPS28830.1|/1.03642e-56/hypothetical protein PDE_03776 [Penicillium oxalicum 114-2]
PDE_03782	970	85.2033	37.04	-1.20183	Down	0.814495	-	-	GO:0036094//small molecule binding	-	gi|525582586|gb|EPS28836.1|/3.37139e-98/hypothetical protein PDE_03782 [Penicillium oxalicum 114-2]
PDE_03788	954	10.7233	39.3433	1.87537	Up	0.8196	-	-	-	-	gi|525582592|gb|EPS28842.1|/2.62916e-172/hypothetical protein PDE_03788 [Penicillium oxalicum 114-2]
PDE_03823	525	23.8633	168.807	2.8225	Up	0.937172	K09983|1|3e-42|171|aor:AOR_1_404184|uncharacterized protein	-	-	-	gi|525582627|gb|EPS28877.1|/3.63558e-95/hypothetical protein PDE_03823 [Penicillium oxalicum 114-2]
PDE_03835	231	45.3533	129.837	1.51742	Up	0.875315	-	-	-	-	gi|525582639|gb|EPS28889.1|/1.49457e-31/hypothetical protein PDE_03835 [Penicillium oxalicum 114-2]
PDE_03874	1790	21.4967	55.94	1.37977	Up	0.809067	K04709|1|6e-135|199|pcs:Pc22g16960|Acyl-CoA-dependent ceramide synthase [EC:2.3.1.24]	-	-	-	gi|525582678|gb|EPS28928.1|/0/hypothetical protein PDE_03874 [Penicillium oxalicum 114-2]
PDE_03901	2233	147.437	342.95	1.2179	Up	0.862433	K00276|1|0.0|1152|pcs:Pc22g17240|primary-amine oxidase [EC:1.4.3.21]	-	GO:0046914//transition metal ion binding;GO:0016641//oxidoreductase activity, acting on the CH-NH2 group of donors, oxygen as acceptor;GO:0048037//cofactor binding	GO:0044710;GO:1901564	gi|525582705|gb|EPS28955.1|/0/hypothetical protein PDE_03901 [Penicillium oxalicum 114-2]
PDE_03916	1703	69.93	241.893	1.79039	Up	0.914863	K01655|1|0.0|524|afv:AFLA_089720|homocitrate synthase [EC:2.3.3.14]	-	GO:0046912//transferase activity, transferring acyl groups, acyl groups converted into alkyl on transfer	GO:0009085//lysine biosynthetic process	gi|849274317|dbj|GAO83510.1|/0/homocitrate synthase, mitochondrial [Neosartorya udagawae]
PDE_03934	830	5.16	165.8	5.00593	Up	0.957814	-	-	-	-	gi|525582738|gb|EPS28988.1|/1.63888e-52/hypothetical protein PDE_03934 [Penicillium oxalicum 114-2]
PDE_03936	1519	19.7433	90.3267	2.19379	Up	0.89999	K09202|1|1e-07|58.9|bor:COCMIDRAFT_3064|regulatory protein SWI5;K09467|4|2e-07|48.1|pan:PODANSg3646|zinc-finger protein CreA/MIG	-	-	-	gi|525582740|gb|EPS28990.1|/0/hypothetical protein PDE_03936 [Penicillium oxalicum 114-2]
PDE_03974	914	119.07	271.34	1.18829	Up	0.853635	K00286|1|3e-78|292|afv:AFLA_014050|pyrroline-5-carboxylate reductase [EC:1.5.1.2]	-	GO:0016646//oxidoreductase activity, acting on the CH-NH group of donors, NAD or NADP as acceptor;GO:0036094//small molecule binding	GO:0006561//proline biosynthetic process	gi|742075711|gb|KIA75659.1|/3.21144e-108/Pyrroline-5-carboxylate reductase [Aspergillus ustus]
PDE_03980	908	38.3333	92.96	1.27801	Up	0.831887	-	-	-	-	gi|525582784|gb|EPS29034.1|/2.68459e-46/hypothetical protein PDE_03980 [Penicillium oxalicum 114-2]
PDE_03985	5096	56.78	9.90333	-2.5194	Down	0.88008	K00869|1|3e-70|268|maw:MAC_09056|mevalonate kinase [EC:2.7.1.36];K07374|2|8e-20|101|ani:AN5080.2|tubulin alpha	-	GO:0003676//nucleic acid binding;GO:0003824//catalytic activity	-	gi|859259233|emb|CEJ62916.1|/0/Putative Reverse transcriptase [Penicillium brasilianum]
PDE_03991	298	392.233	155.313	-1.33653	Down	0.882343	-	-	-	-	gi|525582794|gb|EPS29044.1|/1.51232e-44/hypothetical protein PDE_03991 [Penicillium oxalicum 114-2]
PDE_04031	1798	49.46	112.777	1.18913	Up	0.827667	K01697|1|0.0|493|act:ACLA_079620|cystathionine beta-synthase [EC:4.2.1.22]	GO:0044424	-	GO:0019344//cysteine biosynthetic process	gi|525582832|gb|EPS29082.1|/0/hypothetical protein PDE_04031 [Penicillium oxalicum 114-2]
PDE_04054	435	22.8433	71.0967	1.63801	Up	0.856749	K17362|1|1e-51|201|act:ACLA_079450|acyl-coenzyme A thioesterase 13 [EC:3.1.2.-]	-	GO:0005543//phospholipid binding	GO:0044763	gi|525582855|gb|EPS29105.1|/2.1946e-75/hypothetical protein PDE_04054 [Penicillium oxalicum 114-2]
PDE_04065	1520	5.22667	33.0367	2.66011	Up	0.832891	K07300|1|9e-162|297|pcs:Pc13g05310|Ca2+:H+ antiporter	GO:0016020//membrane	-	GO:0044765//single-organism transport	gi|525582866|gb|EPS29116.1|/0/hypothetical protein PDE_04065 [Penicillium oxalicum 114-2]
PDE_04070	786	142.06	51.5367	-1.46283	Down	0.872133	K14213|1|1e-36|154|mbe:MBM_09112|Xaa-Pro dipeptidase [EC:3.4.13.9];K20032|2|1e-14|80.5|aje:HCAG_07430|palmitoyltransferase ZDHHC13/17 [EC:2.3.1.225];K06654|3|3e-07|56.2|cal:CaO19.13178|phosphate system cyclin PHO80	-	-	-	gi|525582871|gb|EPS29121.1|/1.50411e-145/hypothetical protein PDE_04070 [Penicillium oxalicum 114-2]
PDE_04088	824	1303.25	333.26	-1.9674	Down	0.940048	-	-	-	-	gi|525582889|gb|EPS29139.1|/1.63102e-20/hypothetical protein PDE_04088 [Penicillium oxalicum 114-2]
PDE_04090	1850	76.0067	184.063	1.276	Up	0.859114	K00600|1|0.0|677|pcs:Pc13g05010|glycine hydroxymethyltransferase [EC:2.1.2.1]	-	GO:0016742//hydroxymethyl-, formyl- and related transferase activity;GO:0043168//anion binding	GO:0009069//serine family amino acid metabolic process;GO:0006730//one-carbon metabolic process	gi|525582891|gb|EPS29141.1|/0/hypothetical protein PDE_04090 [Penicillium oxalicum 114-2]
PDE_04092	2030	38.11	128.483	1.75334	Up	0.894851	K00600|1|3e-109|396|ani:AN5835.2|glycine hydroxymethyltransferase [EC:2.1.2.1]	-	-	GO:0008152//metabolic process	gi|525582893|gb|EPS29143.1|/0/hypothetical protein PDE_04092 [Penicillium oxalicum 114-2]
PDE_04101	493	105.817	9.02667	-3.55123	Down	0.929838	-	-	-	-	gi|525582902|gb|EPS29152.1|/3.15315e-57/hypothetical protein PDE_04101 [Penicillium oxalicum 114-2]
PDE_04154	1374	48.0967	343.46	2.83613	Up	0.95145	-	-	-	-	gi|525582955|gb|EPS29205.1|/1.98942e-151/putative endo-alpha-1,4-polygalactosaminidase [Penicillium oxalicum 114-2]
PDE_04203	786	79.05	32.7667	-1.27054	Down	0.82103	K12883|1|3e-65|145|nfi:NFIA_084190|nuclear cap-binding protein subunit 2	GO:0034518//RNA cap binding complex;GO:0005684//U2-type spliceosomal complex	GO:0036094//small molecule binding;GO:0003723//RNA binding	GO:0000398//mRNA splicing, via spliceosome	gi|525583004|gb|EPS29254.1|/2.93585e-74/hypothetical protein PDE_04203 [Penicillium oxalicum 114-2]
PDE_04204	870	25.7233	65.3333	1.34474	Up	0.817643	K08681|1|6e-115|414|pcs:Pc13g04060|5'-phosphate synthase pdxT subunit [EC:4.3.3.6]	-	-	-	gi|525583005|gb|EPS29255.1|/6.16524e-146/hypothetical protein PDE_04204 [Penicillium oxalicum 114-2]
PDE_04216	627	80	12.2133	-2.71154	Down	0.906167	K00253|1|6e-40|164|pno:SNOG_03241|isovaleryl-CoA dehydrogenase [EC:1.3.8.4];K07512|5|4e-08|58.5|pbn:PADG_02837|mitochondrial trans-2-enoyl-CoA reductase [EC:1.3.1.38]	-	GO:0016705//oxidoreductase activity, acting on paired donors, with incorporation or reduction of molecular oxygen	GO:0044710	gi|525583017|gb|EPS29267.1|/5.5276e-114/hypothetical protein PDE_04216 [Penicillium oxalicum 114-2]
PDE_04218	1102	26.64	681.717	4.67751	Up	0.973606	K12661|1|1e-19|75.9|mbe:MBM_00445|L-rhamnonate dehydratase [EC:4.2.1.90];K18337|3|2e-19|76.6|bcom:BAUCODRAFT_64509|L-rhamnose 1-dehydrogenase [EC:1.1.1.378 1.1.1.377 1.1.1.173]	-	GO:0036094//small molecule binding;GO:0003824//catalytic activity	GO:0044710	gi|525583019|gb|EPS29269.1|/1.602e-140/hypothetical protein PDE_04218 [Penicillium oxalicum 114-2]
PDE_04219	1657	28.36	495.783	4.12778	Up	0.967225	K01915|1|0.0|440|pcs:Pc20g13560|glutamine synthetase [EC:6.3.1.2]	-	GO:0016211;GO:0032550	GO:0006541//glutamine metabolic process	gi|525583020|gb|EPS29270.1|/0/hypothetical protein PDE_04219 [Penicillium oxalicum 114-2]
PDE_04225	1892	1.28667	92.1867	6.16285	Up	0.948438	-	-	-	-	gi|525583026|gb|EPS29276.1|/1.10164e-125/hypothetical protein PDE_04225 [Penicillium oxalicum 114-2]
PDE_04226	1003	17.86	95.3733	2.41685	Up	0.908754	K07562|1|7e-40|158|cthr:CTHT_0031110|nonsense-mediated mRNA decay protein 3	-	-	-	gi|525583027|gb|EPS29277.1|/5.23297e-140/hypothetical protein PDE_04226 [Penicillium oxalicum 114-2]
PDE_04254	510	86.7933	25.7633	-1.75226	Down	0.876676	-	-	-	-	gi|525583055|gb|EPS29305.1|/3.09824e-53/hypothetical protein PDE_04254 [Penicillium oxalicum 114-2]
PDE_04259	1788	9.65667	39.3767	2.02774	Up	0.828075	K16261|1|0.0|832|pcs:Pc14g00150|yeast amino acid transporter	GO:0031224//intrinsic component of membrane	GO:0046943//carboxylic acid transmembrane transporter activity	GO:0044763;GO:0006865//amino acid transport	gi|525583060|gb|EPS29310.1|/0/hypothetical protein PDE_04259 [Penicillium oxalicum 114-2]
PDE_04263	1408	9.08333	60.8	2.74278	Up	0.89029	-	-	-	-	gi|525583064|gb|EPS29314.1|/2.10937e-151/hypothetical protein PDE_04263 [Penicillium oxalicum 114-2]
PDE_04265	1236	5.68333	31.2833	2.46059	Up	0.820707	-	-	GO:0005488//binding	-	gi|525583066|gb|EPS29316.1|/0/hypothetical protein PDE_04265 [Penicillium oxalicum 114-2]
PDE_04267	1982	84.0067	25.7167	-1.7078	Down	0.872269	K19564|1|2e-41|105|bze:COCCADRAFT_9547|choline transport protein	GO:0016020//membrane	-	-	gi|525583068|gb|EPS29318.1|/0/hypothetical protein PDE_04267 [Penicillium oxalicum 114-2]
PDE_04277	771	10.74	77.27	2.84691	Up	0.90712	K17644|1|9e-93|340|ela:UCREL1_771|norsolorinic acid ketoreductase [EC:1.1.1.349]	-	-	GO:0008152//metabolic process	gi|525583078|gb|EPS29328.1|/1.89326e-137/hypothetical protein PDE_04277 [Penicillium oxalicum 114-2]
PDE_04291	1458	53.1767	7.64667	-2.79789	Down	0.881322	-	-	-	-	gi|525583092|gb|EPS29342.1|/0/hypothetical protein PDE_04291 [Penicillium oxalicum 114-2]
PDE_04321	2111	5.33667	33.2767	2.6405	Up	0.833282	K00606|1|3e-34|140|wic:J056_003735|3-methyl-2-oxobutanoate hydroxymethyltransferase [EC:2.1.2.11]	-	-	-	gi|525583122|gb|EPS29372.1|/0/hypothetical protein PDE_04321 [Penicillium oxalicum 114-2]
PDE_04356	1692	63.3167	151.263	1.25641	Up	0.850078	K01083|1|0.0|411|afm:AFUA_3G00310|3-phytase [EC:3.1.3.8]	-	GO:0016791//phosphatase activity	-	gi|525583157|gb|EPS29407.1|/0/hypothetical protein PDE_04356 [Penicillium oxalicum 114-2]
PDE_04376	1946	94.2033	16.2467	-2.53563	Down	0.911017	K00108|1|8e-49|117|dsq:DICSQDRAFT_171858|choline dehydrogenase [EC:1.1.99.1]	-	GO:0016614//oxidoreductase activity, acting on CH-OH group of donors;GO:0000166//nucleotide binding	GO:0044281//small molecule metabolic process	gi|525583177|gb|EPS29427.1|/0/hypothetical protein PDE_04376 [Penicillium oxalicum 114-2]
PDE_04389	917	231.767	85.3	-1.44206	Down	0.884045	-	-	-	-	gi|525583190|gb|EPS29440.1|/7.48994e-122/hypothetical protein PDE_04389 [Penicillium oxalicum 114-2]
PDE_04393	1272	162.413	18.82	-3.10933	Down	0.93918	K15855|1|7e-154|544|ani:AN2824.2|exo-1,4-beta-D-glucosaminidase [EC:3.2.1.165]	-	GO:0003824//catalytic activity	-	gi|525583194|gb|EPS29444.1|/0/hypothetical protein PDE_04393 [Penicillium oxalicum 114-2]
PDE_04395	2572	95.8867	41.1133	-1.22172	Down	0.824433	-	-	GO:0008324//cation transmembrane transporter activity	GO:0006811//ion transport;GO:0055085//transmembrane transport	gi|525583196|gb|EPS29446.1|/0/hypothetical protein PDE_04395 [Penicillium oxalicum 114-2]
PDE_04412	1847	9.30333	37.1633	1.99806	Up	0.8204	K03457|1|8e-21|102|nhe:NECHADRAFT_30409|nucleobase:cation symporter-1, NCS1 family;K01427|3|1e-13|79.0|fpu:FPSE_00700|urease [EC:3.5.1.5];K09241|5|2e-07|58.2|maj:MAA_08096|transcriptional regulatory protein GAL4	-	-	GO:0006351//transcription, DNA-templated	gi|525583212|gb|EPS29462.1|/0/hypothetical protein PDE_04412 [Penicillium oxalicum 114-2]
PDE_04432	2069	3.35333	49.0433	3.87039	Up	0.890426	K16261|1|0.0|786|pcs:Pc13g03760|yeast amino acid transporter	GO:0031224//intrinsic component of membrane	GO:0046943//carboxylic acid transmembrane transporter activity	GO:0044763;GO:0006865//amino acid transport	gi|525583232|gb|EPS29482.1|/0/hypothetical protein PDE_04432 [Penicillium oxalicum 114-2]
PDE_04444	1476	14.2133	80.23	2.4969	Up	0.901674	-	-	-	-	gi|525583244|gb|EPS29494.1|/0/hypothetical protein PDE_04444 [Penicillium oxalicum 114-2]
PDE_04479	882	20.9167	54.4	1.37895	Up	0.806497	-	-	-	-	gi|525583279|gb|EPS29529.1|/5.77251e-115/hypothetical protein PDE_04479 [Penicillium oxalicum 114-2]
PDE_04487	960	27.4933	220.187	3.00157	Up	0.945936	K17732|1|9e-12|71.6|cci:CC1G_15045|mitochondrial-processing peptidase subunit beta [EC:3.4.24.64];K03686|2|7e-11|68.6|maw:MAC_01367|molecular chaperone DnaJ;K20367|3|1e-09|64.3|gtr:GLOTRDRAFT_121678|endoplasmic reticulum-Golgi intermediate compartment protein 3;K11153|4|2e-08|60.5|psq:PUNSTDRAFT_55413|retinol dehydrogenase 12 [EC:1.1.1.300];K00218|5|8e-08|58.5|yli:YALI0D09427g|protochlorophyllide…	-	-	GO:0008152//metabolic process	gi|525583287|gb|EPS29537.1|/8.00271e-169/hypothetical protein PDE_04487 [Penicillium oxalicum 114-2]
PDE_04488	1113	8.97667	33.2267	1.88809	Up	0.801392	-	-	-	-	gi|525583288|gb|EPS29538.1|/0/putative exo-alpha-L-1,5-arabinanase [Penicillium oxalicum 114-2]
PDE_04505	1449	34.4433	77.5367	1.17065	Up	0.80323	K00505|1|8e-107|275|afv:AFLA_067860|tyrosinase [EC:1.14.18.1]	-	-	-	gi|525583305|gb|EPS29555.1|/0/hypothetical protein PDE_04505 [Penicillium oxalicum 114-2]
PDE_04512	1167	5.64333	93.4133	4.04901	Up	0.929821	K00670|1|3e-14|80.1|bor:COCMIDRAFT_95248|peptide alpha-N-acetyltransferase [EC:2.3.1.88];K00681|5|1e-06|54.7|ani:AN3767.2|gamma-glutamyltranspeptidase / glutathione hydrolase [EC:2.3.2.2 3.4.19.13]	-	-	-	gi|525583312|gb|EPS29562.1|/0/hypothetical protein PDE_04512 [Penicillium oxalicum 114-2]
PDE_04519	570	778.213	2094.3	1.42823	Up	0.90193	K01855|1|3e-07|55.5|mbe:MBM_04089|tRNA pseudouridine38/39 synthase [EC:5.4.99.45]	-	-	-	gi|525583319|gb|EPS29569.1|/1.79049e-91/hypothetical protein PDE_04519 [Penicillium oxalicum 114-2]
PDE_04531	1278	34.9867	146.567	2.06668	Up	0.915509	K00459|1|2e-69|263|npa:UCRNP2_3953|nitronate monooxygenase [EC:1.13.12.16]	-	-	-	gi|525583331|gb|EPS29581.1|/0/hypothetical protein PDE_04531 [Penicillium oxalicum 114-2]
PDE_04535	4738	79.92	217.753	1.44607	Up	0.883619	K01196|1|0.0|2492|pcs:Pc22g22120|glycogen debranching enzyme [EC:2.4.1.25 3.2.1.33]	GO:0044424	GO:0004133//glycogen debranching enzyme activity	GO:0005977//glycogen metabolic process	gi|525583335|gb|EPS29585.1|/0/putative glycogen debranching enzyme [Penicillium oxalicum 114-2]
PDE_04539	866	9.81	37.49	1.93418	Up	0.817286	-	-	-	-	gi|525583339|gb|EPS29589.1|/3.75833e-137/hypothetical protein PDE_04539 [Penicillium oxalicum 114-2]
PDE_04552	2398	39.7167	88.62	1.15789	Up	0.809918	-	-	-	-	gi|525583352|gb|EPS29602.1|/0/hypothetical protein PDE_04552 [Penicillium oxalicum 114-2]
PDE_04553	2115	30.1433	71.9733	1.25562	Up	0.812385	-	-	-	-	gi|525583353|gb|EPS29603.1|/0/hypothetical protein PDE_04553 [Penicillium oxalicum 114-2]
PDE_04566	1408	52.64	7.09333	-2.89162	Down	0.882734	K01253|1|9e-98|283|afm:AFUA_4G07410|microsomal epoxide hydrolase [EC:3.3.2.9]	-	GO:0003824//catalytic activity	-	gi|525583366|gb|EPS29616.1|/3.14077e-175/hypothetical protein PDE_04566 [Penicillium oxalicum 114-2]
PDE_04575	3911	33.9967	82.9867	1.28749	Up	0.826646	K17943|1|2e-51|188|shs:STEHIDRAFT_50957|pumilio RNA-binding family	-	-	-	gi|525583375|gb|EPS29625.1|/0/hypothetical protein PDE_04575 [Penicillium oxalicum 114-2]
PDE_04581	2922	235.013	715.787	1.60679	Up	0.917994	K01876|1|0.0|1570|pcs:Pc22g21630|aspartyl-tRNA synthetase [EC:6.1.1.12]	GO:0044424	GO:0004812//aminoacyl-tRNA ligase activity;GO:0032550	GO:0006418//tRNA aminoacylation for protein translation	gi|525583381|gb|EPS29631.1|/0/hypothetical protein PDE_04581 [Penicillium oxalicum 114-2]
PDE_04583	1008	125.167	341.863	1.44957	Up	0.892298	K01046|1|1e-14|81.3|afm:AFUA_5G03770|triacylglycerol lipase [EC:3.1.1.3];K14731|2|7e-10|65.5|pfj:MYCFIDRAFT_210278|epsilon-lactone hydrolase [EC:3.1.1.83];K17648|3|1e-09|64.3|pfj:MYCFIDRAFT_42424|versiconal hemiacetal acetate esterase [EC:3.1.1.94]	-	GO:0003824//catalytic activity	-	gi|525583383|gb|EPS29633.1|/6.00742e-178/hypothetical protein PDE_04583 [Penicillium oxalicum 114-2]
PDE_04604	1048	206.44	2.66667	-6.27454	Down	0.973657	K00069|1|1e-12|74.7|bsc:COCSADRAFT_113511|15-hydroxyprostaglandin dehydrogenase (NAD) [EC:1.1.1.141];K17652|2|5e-10|65.9|afv:AFLA_139330|5'-hydroxyaverantin dehydrogenase [EC:1.1.1.352]	-	-	-	gi|525583404|gb|EPS29654.1|/2.51302e-150/hypothetical protein PDE_04604 [Penicillium oxalicum 114-2]
PDE_04605	1465	52.9267	19.4033	-1.44769	Down	0.811653	K00480|1|5e-114|412|aor:AOR_1_1292084|salicylate hydroxylase [EC:1.14.13.1]	-	GO:0003824//catalytic activity	GO:0044710	gi|525583405|gb|EPS29655.1|/1.95626e-152/hypothetical protein PDE_04605 [Penicillium oxalicum 114-2]
PDE_04610	1419	70.5667	29.8133	-1.24303	Down	0.808165	K10773|1|3e-146|518|pcs:Pc15g00960|endonuclease III [EC:4.2.99.18]	-	-	-	gi|525583410|gb|EPS29660.1|/0/hypothetical protein PDE_04610 [Penicillium oxalicum 114-2]
PDE_04615	600	87.7133	32.7367	-1.42189	Down	0.846692	K06910|1|1e-51|202|tre:TRIREDRAFT_122998|uncharacterized protein	-	-	-	gi|525583415|gb|EPS29665.1|/5.34376e-108/hypothetical protein PDE_04615 [Penicillium oxalicum 114-2]
PDE_04621	1614	53.0167	7.37	-2.84671	Down	0.88253	-	GO:0043231//intracellular membrane-bounded organelle	GO:0046914//transition metal ion binding;GO:0003676//nucleic acid binding;GO:0001071//nucleic acid binding transcription factor activity	GO:0006351//transcription, DNA-templated	gi|525583421|gb|EPS29671.1|/6.16968e-86/hypothetical protein PDE_04621 [Penicillium oxalicum 114-2]
PDE_04627	1544	111.297	29.27	-1.92692	Down	0.898356	-	-	GO:0003933//GTP cyclohydrolase activity	GO:0006771//riboflavin metabolic process	gi|525583427|gb|EPS29677.1|/0/hypothetical protein PDE_04627 [Penicillium oxalicum 114-2]
PDE_04628	1028	94.1033	11.58	-3.02261	Down	0.919168	K06123|1|6e-08|58.9|clu:CLUG_04223|1-acylglycerone phosphate reductase [EC:1.1.1.101]	-	GO:0036094//small molecule binding;GO:0003824//catalytic activity	GO:0044710	gi|525583428|gb|EPS29678.1|/1.95922e-115/hypothetical protein PDE_04628 [Penicillium oxalicum 114-2]
PDE_04634	3481	8.91	79.3467	3.15467	Up	0.91231	K01536|1|0.0|897|afm:AFUA_2G01320|Na+-exporting ATPase [EC:3.6.3.7]	GO:0016020//membrane	GO:0036094//small molecule binding;GO:0043167//ion binding;GO:1901363//heterocyclic compound binding;GO:0097159//organic cyclic compound binding;GO:0003824//catalytic activity	-	gi|525583434|gb|EPS29684.1|/0/hypothetical protein PDE_04634 [Penicillium oxalicum 114-2]
PDE_04637	1968	34.2667	85.6967	1.32243	Up	0.832976	K00858|1|0.0|838|pcs:Pc20g05800|NAD+ kinase [EC:2.7.1.23]	-	GO:0016301//kinase activity	GO:0006739//NADP metabolic process	gi|525583437|gb|EPS29687.1|/0/hypothetical protein PDE_04637 [Penicillium oxalicum 114-2]
PDE_04641	874	12.15	66.8933	2.46091	Up	0.890324	K18337|1|3e-22|89.4|npa:UCRNP2_3170|L-rhamnose 1-dehydrogenase [EC:1.1.1.378 1.1.1.377 1.1.1.173];K00059|3|1e-20|87.0|pfj:MYCFIDRAFT_43982|3-oxoacyl-[acyl-carrier protein] reductase [EC:1.1.1.100]	-	GO:0036094//small molecule binding;GO:0003824//catalytic activity	GO:0044710	gi|525583441|gb|EPS29691.1|/9.00339e-142/hypothetical protein PDE_04641 [Penicillium oxalicum 114-2]
PDE_04660	2134	71.4267	4.39333	-4.02307	Down	0.916973	K08176|1|1e-24|115|cgi:CGB_C6070W|MFS transporter, PHS family, inorganic phosphate transporter	-	-	-	gi|525583460|gb|EPS29710.1|/0/hypothetical protein PDE_04660 [Penicillium oxalicum 114-2]
PDE_04664	519	281.38	139.143	-1.01595	Down	0.820298	K13727|1|2e-40|164|pgu:PGUG_00028|phenolic acid decarboxylase [EC:4.1.1.-]	-	GO:0016830//carbon-carbon lyase activity	-	gi|525583464|gb|EPS29714.1|/4.70615e-100/hypothetical protein PDE_04664 [Penicillium oxalicum 114-2]
PDE_04667	674	472.077	218.867	-1.10897	Down	0.846896	-	-	-	-	gi|525583467|gb|EPS29717.1|/1.59057e-83/hypothetical protein PDE_04667 [Penicillium oxalicum 114-2]
PDE_04671	2612	40.0533	11.7967	-1.76354	Down	0.81407	K05767|1|0.0|1144|pcs:Pc12g15610|Ras GTPase-activating-like protein IQGAP2/3	GO:0044464	GO:0008047//enzyme activator activity	-	gi|525583471|gb|EPS29721.1|/0/hypothetical protein PDE_04671 [Penicillium oxalicum 114-2]
PDE_04680	962	30.2367	2.44	-3.63135	Down	0.840906	-	-	-	-	gi|115396118|ref|XP_001213698.1|/6.4982e-107/conserved hypothetical protein [Aspergillus terreus NIH2624]
PDE_04683	2218	29.35	86.25	1.55516	Up	0.860816	K01176|1|6e-80|299|pcs:Pc16g06150|alpha-amylase [EC:3.2.1.1]	-	GO:0016798//hydrolase activity, acting on glycosyl bonds;GO:0046872//metal ion binding	GO:0044238//primary metabolic process	gi|859269719|emb|CEJ56523.1|/3.62617e-121/hypothetical protein PMG11_02727 [Penicillium brasilianum]
PDE_04684	1746	546.267	265.837	-1.03907	Down	0.834354	K01176|1|2e-176|619|ani:AN3308.2|alpha-amylase [EC:3.2.1.1]	-	GO:0016798//hydrolase activity, acting on glycosyl bonds	GO:0008152//metabolic process	gi|525583484|gb|EPS29734.1|/0/putative alpha-amylase [Penicillium oxalicum 114-2]
PDE_04685	7782	94.7967	236.72	1.32027	Up	0.870584	K00749|1|0.0|3155|ang:ANI_1_360084|alpha-1,3-glucan synthase [EC:2.4.1.183]	-	-	GO:0008152//metabolic process	gi|525583485|gb|EPS29735.1|/0/putative alpha-1,3-glucan synthase [Penicillium oxalicum 114-2]
PDE_04702	1039	90.7	241.96	1.41559	Up	0.882836	K03120|1|2e-104|271|act:ACLA_037980|transcription initiation factor TFIID TATA-box-binding protein	-	GO:0008135//translation factor activity, RNA binding	GO:0006351//transcription, DNA-templated;GO:0006412//translation	gi|525583502|gb|EPS29752.1|/6.15461e-117/hypothetical protein PDE_04702 [Penicillium oxalicum 114-2]
PDE_04705	1547	27.5833	71.3733	1.37159	Up	0.827343	-	-	-	-	gi|525583505|gb|EPS29755.1|/0/hypothetical protein PDE_04705 [Penicillium oxalicum 114-2]
PDE_04712	693	44.6033	125.287	1.49001	Up	0.870142	-	-	GO:0016740//transferase activity	-	gi|525583512|gb|EPS29762.1|/3.32119e-132/hypothetical protein PDE_04712 [Penicillium oxalicum 114-2]
PDE_04737	802	218.553	99.9967	-1.12803	Down	0.83803	K00721|1|6e-123|397|pcs:Pc13g10270|dolichol-phosphate mannosyltransferase [EC:2.4.1.83]	-	GO:0016740//transferase activity	-	gi|525583537|gb|EPS29787.1|/3.65543e-133/putative dolichyl-phosphate beta-D-mannosyltransferase [Penicillium oxalicum 114-2]
PDE_04779	1225	66.2233	12.7567	-2.37609	Down	0.887584	-	-	-	-	gi|525583579|gb|EPS29829.1|/6.45214e-135/hypothetical protein PDE_04779 [Penicillium oxalicum 114-2]
PDE_04801	2939	32.2033	137.267	2.0917	Up	0.914591	K01196|1|8e-35|150|ani:AN0352.2|glycogen debranching enzyme [EC:2.4.1.25 3.2.1.33];K13431|2|3e-31|138|bze:COCCADRAFT_90306|signal recognition particle receptor subunit alpha	-	-	-	gi|525583601|gb|EPS29851.1|/0/hypothetical protein PDE_04801 [Penicillium oxalicum 114-2]
PDE_04806	900	42.41	229.103	2.43352	Up	0.937598	K06665|1|1e-06|54.3|pic:PICST_66638|glucose repression mediator protein;K11294|2|6e-06|52.0|shs:STEHIDRAFT_122373|nucleolin	-	-	-	gi|525583606|gb|EPS29856.1|/2.3551e-111/hypothetical protein PDE_04806 [Penicillium oxalicum 114-2]
PDE_04812	1930	66.6933	345.56	2.37332	Up	0.943435	K01952|1|1e-66|255|pno:SNOG_10851|phosphoribosylformylglycinamidine synthase [EC:6.3.5.3];K14708|3|1e-66|254|cmt:CCM_00881|solute carrier family 26 (sodium-independent sulfate anion transporter), member 11;K10866|5|1e-35|152|nhe:NECHADRAFT_65858|DNA repair protein RAD50 [EC:3.6.-.-]	-	-	-	gi|525583612|gb|EPS29862.1|/0/hypothetical protein PDE_04812 [Penicillium oxalicum 114-2]
PDE_04837	2662	68.1233	26.0233	-1.38834	Down	0.825761	K01415|1|0.0|1019|pcs:Pc18g01570|endothelin-converting enzyme [EC:3.4.24.71]	-	GO:0070011//peptidase activity, acting on L-amino acid peptides	-	gi|525583637|gb|EPS29887.1|/0/hypothetical protein PDE_04837 [Penicillium oxalicum 114-2]
PDE_04883	1213	6.91667	62.1933	3.16861	Up	0.899513	-	-	-	-	gi|525583683|gb|EPS29933.1|/3.91965e-73/hypothetical protein PDE_04883 [Penicillium oxalicum 114-2]
PDE_04886	1520	14.5	155.127	3.41932	Up	0.941597	-	-	-	-	gi|525583686|gb|EPS29936.1|/0/hypothetical protein PDE_04886 [Penicillium oxalicum 114-2]
PDE_04915	1430	512.57	16.71	-4.93897	Down	0.973913	K08095|1|1e-43|178|afm:AFUA_2G14420|cutinase [EC:3.1.1.74]	-	GO:0052689//carboxylic ester hydrolase activity	-	gi|525583715|gb|EPS29965.1|/5.83459e-61/putative cutinase [Penicillium oxalicum 114-2]
PDE_04978	1398	54.5	117.887	1.11307	Up	0.815448	K14443|1|4e-20|100|lel:LELG_03995|protein Tob/BTG	-	-	-	gi|525583778|gb|EPS30028.1|/0/hypothetical protein PDE_04978 [Penicillium oxalicum 114-2]
PDE_04985	543	41.58	204.633	2.29908	Up	0.931131	-	-	-	-	gi|525583785|gb|EPS30035.1|/1.04923e-95/hypothetical protein PDE_04985 [Penicillium oxalicum 114-2]
PDE_05020	717	28.66	423.943	3.88676	Up	0.963362	K00799|1|5e-87|320|pcs:Pc22g23120|glutathione S-transferase [EC:2.5.1.18]	-	-	-	gi|525583820|gb|EPS30070.1|/3.4213e-135/hypothetical protein PDE_05020 [Penicillium oxalicum 114-2]
PDE_05055	953	158.89	68.55	-1.2128	Down	0.843918	-	-	-	-	-
PDE_05075	1038	379.437	171.07	-1.14927	Down	0.851967	-	-	-	-	gi|525583875|gb|EPS30125.1|/7.29287e-110/hypothetical protein PDE_05075 [Penicillium oxalicum 114-2]
PDE_05076	1604	14.4733	60.4033	2.06123	Up	0.869512	-	-	-	-	gi|525583876|gb|EPS30126.1|/0/hypothetical protein PDE_05076 [Penicillium oxalicum 114-2]
PDE_05082	3280	622.34	209.58	-1.5702	Down	0.912123	K01183|1|2e-07|59.7|cmt:CCM_06535|chitinase [EC:3.2.1.14]	-	-	-	gi|525583882|gb|EPS30132.1|/9.7069e-157/hypothetical protein PDE_05082 [Penicillium oxalicum 114-2]
PDE_05083	2304	43.6167	8.04333	-2.43901	Down	0.855507	-	-	GO:0016772//transferase activity, transferring phosphorus-containing groups	-	gi|525583883|gb|EPS30133.1|/0/hypothetical protein PDE_05083 [Penicillium oxalicum 114-2]
PDE_05091	915	1794.95	716.843	-1.32421	Down	0.888605	K01426|1|2e-18|93.6|fpu:FPSE_02859|amidase [EC:3.5.1.4]	-	GO:0016740//transferase activity	-	gi|525583891|gb|EPS30141.1|/8.48968e-165/hypothetical protein PDE_05091 [Penicillium oxalicum 114-2]
PDE_05119	567	2.72	76.47	4.81322	Up	0.928255	-	-	GO:0016740//transferase activity	-	gi|525583919|gb|EPS30169.1|/4.17461e-109/hypothetical protein PDE_05119 [Penicillium oxalicum 114-2]
PDE_05135	1944	33.9867	85.8633	1.33707	Up	0.836124	-	-	-	-	gi|525583935|gb|EPS30185.1|/0/hypothetical protein PDE_05135 [Penicillium oxalicum 114-2]
PDE_05137	1164	8.95333	65.3733	2.86821	Up	0.897846	-	GO:0031224//intrinsic component of membrane	-	GO:0050896//response to stimulus	gi|525583937|gb|EPS30187.1|/3.25162e-112/hypothetical protein PDE_05137 [Penicillium oxalicum 114-2]
PDE_05150	4275	3	47.7667	3.99297	Up	0.889388	K01537|1|0.0|1008|pcs:Pc18g00570|Ca2+-transporting ATPase [EC:3.6.3.8]	GO:0016020//membrane	GO:0097159//organic cyclic compound binding;GO:0019829//cation-transporting ATPase activity;GO:0043167//ion binding;GO:1901363//heterocyclic compound binding;GO:0036094//small molecule binding	GO:0006812//cation transport	gi|525583950|gb|EPS30200.1|/0/hypothetical protein PDE_05150 [Penicillium oxalicum 114-2]
PDE_05151	189	9.50667	122.01	3.68192	Up	0.936441	-	-	-	-	gi|525583951|gb|EPS30201.1|/5.28933e-29/hypothetical protein PDE_05151 [Penicillium oxalicum 114-2]
PDE_05163	2309	29.06	122.99	2.08143	Up	0.909553	K09467|1|2e-09|58.5|smp:SMAC_09459|zinc-finger protein CreA/MIG;K09202|5|1e-07|59.3|bsc:COCSADRAFT_118399|regulatory protein SWI5	GO:0005622//intracellular	GO:0005488//binding	-	gi|552332437|gb|AGY46354.1|/0/PacC [Penicillium decumbens]
PDE_05177	826	76.42	31.8133	-1.26432	Down	0.817184	K07941|1|4e-74|246|pcs:Pc18g00280|ADP-ribosylation factor 6	GO:0005933//cellular bud	GO:0032550;GO:0003723//RNA binding	GO:0016192//vesicle-mediated transport;GO:0035556//intracellular signal transduction;GO:0007015//actin filament organization;GO:0006661//phosphatidylinositol biosynthetic process;GO:0007105//cytokinesis, site selection;GO:0051641//cellular localization	gi|525583977|gb|EPS30227.1|/2.88537e-76/hypothetical protein PDE_05177 [Penicillium oxalicum 114-2]
PDE_05191	1112	77.7433	421.917	2.44017	Up	0.947689	-	-	-	-	gi|525583991|gb|EPS30241.1|/0/hypothetical protein PDE_05191 [Penicillium oxalicum 114-2]
PDE_05244	1437	1.07667	26.2333	4.60676	Up	0.837264	-	-	-	-	gi|525584043|gb|EPS30293.1|/4.14803e-107/hypothetical protein PDE_05244 [Penicillium oxalicum 114-2]
PDE_05281	396	28.49	67.07	1.23521	Up	0.804268	-	-	-	-	gi|525584080|gb|EPS30330.1|/1.5782e-73/hypothetical protein PDE_05281 [Penicillium oxalicum 114-2]
PDE_05295	888	26.51	63.0933	1.25095	Up	0.801341	-	-	-	-	gi|525584094|gb|EPS30344.1|/1.98562e-155/hypothetical protein PDE_05295 [Penicillium oxalicum 114-2]
PDE_05304	2492	45.1633	146.203	1.69475	Up	0.895787	K08286|1|4e-84|313|kla:KLLA0F12188g|protein-serine/threonine kinase [EC:2.7.11.-];K00871|5|5e-50|200|cal:CaO19.2781|phosphorylase kinase gamma subunit [EC:2.7.11.19]	-	GO:0036094//small molecule binding;GO:0004672//protein kinase activity;GO:1901363//heterocyclic compound binding;GO:0097159//organic cyclic compound binding	GO:0006796//phosphate-containing compound metabolic process	gi|525584103|gb|EPS30353.1|/0/hypothetical protein PDE_05304 [Penicillium oxalicum 114-2]
PDE_05305	1666	528.723	49.5433	-3.41575	Down	0.961609	K01288|1|0.0|741|act:ACLA_091010|carboxypeptidase D [EC:3.4.16.6]	-	GO:0004180//carboxypeptidase activity	GO:0019538//protein metabolic process	gi|525584104|gb|EPS30354.1|/0/hypothetical protein PDE_05305 [Penicillium oxalicum 114-2]
PDE_05309	2151	23.8067	126.537	2.41012	Up	0.920274	K08176|1|9e-09|63.2|nhe:NECHADRAFT_46498|MFS transporter, PHS family, inorganic phosphate transporter	-	-	-	gi|525584108|gb|EPS30358.1|/0/hypothetical protein PDE_05309 [Penicillium oxalicum 114-2]
PDE_05330	3137	88.3	23.0967	-1.93473	Down	0.887397	K20098|1|0.0|1360|pcs:Pc18g05160|DNA excision repair protein ERCC-6-like 2 [EC:3.6.4.-]	-	GO:0017111//nucleoside-triphosphatase activity;GO:0003676//nucleic acid binding;GO:0032550	-	gi|525584129|gb|EPS30379.1|/0/hypothetical protein PDE_05330 [Penicillium oxalicum 114-2]
PDE_05339	1035	974.243	427.813	-1.1873	Down	0.866823	-	-	-	-	gi|525584138|gb|EPS30388.1|/3.54417e-165/hypothetical protein PDE_05339 [Penicillium oxalicum 114-2]
PDE_05344	978	206.743	58.13	-1.83049	Down	0.913825	-	-	-	-	gi|525584143|gb|EPS30393.1|/5.49382e-80/hypothetical protein PDE_05344 [Penicillium oxalicum 114-2]
PDE_05369	2160	21.54	64.37	1.57937	Up	0.843339	K11240|1|2e-169|597|act:ACLA_092030|tyrosine-protein phosphatase MSG5 [EC:3.1.3.48]	-	GO:0016787//hydrolase activity	-	gi|525584168|gb|EPS30418.1|/0/hypothetical protein PDE_05369 [Penicillium oxalicum 114-2]
PDE_05373	618	113.433	35.95	-1.65778	Down	0.884266	-	-	-	-	gi|525584172|gb|EPS30422.1|/6.7772e-85/hypothetical protein PDE_05373 [Penicillium oxalicum 114-2]
PDE_05374	1704	34.3133	2.05667	-4.06039	Down	0.860101	K10436|1|1e-16|88.6|pno:SNOG_14795|microtubule-associated protein, RP/EB family;K19069|2|5e-06|43.9|sla:SERLADRAFT_452187|cellobiose dehydrogenase (acceptor) [EC:1.1.99.18]	-	-	-	gi|525584173|gb|EPS30423.1|/2.32654e-178/hypothetical protein PDE_05374 [Penicillium oxalicum 114-2]
PDE_05379	2674	51.2033	2.62667	-4.28493	Down	0.898577	K14950|1|7e-16|87.0|cput:CONPUDRAFT_91722|cation-transporting ATPase 13A1 [EC:3.6.3.-]	-	-	-	gi|758199780|ref|XP_011322255.1|/0/hypothetical protein FGSG_03460 [Fusarium graminearum PH-1]
PDE_05422	1296	129.253	419.233	1.69755	Up	0.918726	K00549|1|2e-55|217|ela:UCREL1_9620|5-methyltetrahydropteroyltriglutamate--homocysteine methyltransferase [EC:2.1.1.14]	-	GO:0008172//S-methyltransferase activity	GO:0000097//sulfur amino acid biosynthetic process	gi|525584221|gb|EPS30471.1|/0/hypothetical protein PDE_05422 [Penicillium oxalicum 114-2]
PDE_05438	660	39.7267	96.3333	1.27793	Up	0.833895	-	-	-	-	gi|525584237|gb|EPS30487.1|/1.09687e-102/hypothetical protein PDE_05438 [Penicillium oxalicum 114-2]
PDE_05451	2537	40.11	5.67667	-2.82085	Down	0.857243	-	-	-	-	gi|525584250|gb|EPS30500.1|/0/hypothetical protein PDE_05451 [Penicillium oxalicum 114-2]
PDE_05453	2170	161.627	31.0567	-2.37969	Down	0.927881	K09243|1|2e-07|58.9|ctp:CTRG_00137|transcriptional regulatory protein UME6	-	-	GO:0006366//transcription from RNA polymerase II promoter	gi|525584252|gb|EPS30502.1|/0/hypothetical protein PDE_05453 [Penicillium oxalicum 114-2]
PDE_05457	2403	94.94	40.87	-1.21597	Down	0.823753	K20063|1|0.0|935|pcs:Pc18g04520|arrestin-related trafficking adapter 9	-	-	-	gi|525584256|gb|EPS30506.1|/0/hypothetical protein PDE_05457 [Penicillium oxalicum 114-2]
PDE_05499	1574	20.9667	83.4233	1.99235	Up	0.88675	K00819|1|0.0|515|ang:ANI_1_746184|ornithine--oxo-acid transaminase [EC:2.6.1.13]	GO:0043231//intracellular membrane-bounded organelle;GO:0044444//cytoplasmic part	GO:0008483//transaminase activity;GO:0043168//anion binding	GO:1901605	gi|525584297|gb|EPS30547.1|/0/hypothetical protein PDE_05499 [Penicillium oxalicum 114-2]
PDE_05514	1492	80.0367	192.033	1.26262	Up	0.85726	-	-	-	-	gi|525584312|gb|EPS30562.1|/3.08158e-169/hypothetical protein PDE_05514 [Penicillium oxalicum 114-2]
PDE_05515	1290	5.45667	28.7833	2.39914	Up	0.808829	-	-	-	-	gi|525584313|gb|EPS30563.1|/0/putative beta-1,3-glucanase [Penicillium oxalicum 114-2]
PDE_05528	502	54.79	4.21	-3.70202	Down	0.897199	-	-	-	-	gi|525584326|gb|EPS30576.1|/9.4354e-57/hypothetical protein PDE_05528 [Penicillium oxalicum 114-2]
PDE_05548	1671	75.81	522.72	2.78558	Up	0.955058	K00129|1|0.0|710|nfi:NFIA_107580|aldehyde dehydrogenase (NAD(P)+) [EC:1.2.1.5]	-	GO:0016903//oxidoreductase activity, acting on the aldehyde or oxo group of donors	GO:0044710	gi|525584346|gb|EPS30596.1|/0/hypothetical protein PDE_05548 [Penicillium oxalicum 114-2]
PDE_05556	1132	18.3933	224.5	3.60946	Up	0.95259	K00002|1|1e-29|90.1|tpf:TPHA_0A00140|alcohol dehydrogenase (NADP+) [EC:1.1.1.2]	-	GO:0046914//transition metal ion binding;GO:0036094//small molecule binding;GO:0003824//catalytic activity	GO:0044710	gi|525584354|gb|EPS30604.1|/5.8123e-177/hypothetical protein PDE_05556 [Penicillium oxalicum 114-2]
PDE_05558	2735	92.7167	218.58	1.23726	Up	0.857294	K01565|1|1e-06|56.2|ang:ANI_1_1460064|N-sulfoglucosamine sulfohydrolase [EC:3.10.1.1]	-	GO:0003824//catalytic activity	-	gi|525584356|gb|EPS30606.1|/0/hypothetical protein PDE_05558 [Penicillium oxalicum 114-2]
PDE_05572	909	27.7033	150.267	2.43939	Up	0.926826	-	-	-	-	gi|525584370|gb|EPS30620.1|/1.5018e-113/hypothetical protein PDE_05572 [Penicillium oxalicum 114-2]
PDE_05573	1428	16.24	174.577	3.42624	Up	0.944592	K01809|1|2e-166|482|pcs:Pc13g08170|mannose-6-phosphate isomerase [EC:5.3.1.8]	-	GO:0046914//transition metal ion binding;GO:0016861//intramolecular oxidoreductase activity, interconverting aldoses and ketoses	GO:0009226//nucleotide-sugar biosynthetic process	gi|525584371|gb|EPS30621.1|/0/hypothetical protein PDE_05573 [Penicillium oxalicum 114-2]
PDE_05576	343	23.71	61.16	1.36709	Up	0.81538	-	-	-	-	gi|525584374|gb|EPS30624.1|/5.97072e-17/hypothetical protein PDE_05576 [Penicillium oxalicum 114-2]
PDE_05577	900	41.55	105.013	1.33765	Up	0.8471	-	-	-	-	gi|525584375|gb|EPS30625.1|/7.78566e-131/hypothetical protein PDE_05577 [Penicillium oxalicum 114-2]
PDE_05578	1384	132.59	48.5467	-1.44953	Down	0.868899	-	-	-	-	gi|525584376|gb|EPS30626.1|/0/hypothetical protein PDE_05578 [Penicillium oxalicum 114-2]
PDE_05599	1737	41.98	132.15	1.6544	Up	0.890001	K00135|1|0.0|834|pcs:Pc13g07790|succinate-semialdehyde dehydrogenase / glutarate-semialdehyde dehydrogenase [EC:1.2.1.16 1.2.1.79 1.2.1.20]	-	GO:0016620//oxidoreductase activity, acting on the aldehyde or oxo group of donors, NAD or NADP as acceptor	GO:0009063//cellular amino acid catabolic process	gi|525584397|gb|EPS30647.1|/0/hypothetical protein PDE_05599 [Penicillium oxalicum 114-2]
PDE_05603	1726	26.74	204.53	2.93524	Up	0.943145	K04441|1|4e-98|204|cthr:CTHT_0039110|p38 MAP kinase [EC:2.7.11.24]	GO:0044424	GO:0097159//organic cyclic compound binding;GO:1901363//heterocyclic compound binding;GO:0036094//small molecule binding;GO:0004702//receptor signaling protein serine/threonine kinase activity	GO:0006796//phosphate-containing compound metabolic process;GO:0050794//regulation of cellular process;GO:0006351//transcription, DNA-templated	gi|525584401|gb|EPS30651.1|/9.32861e-142/hypothetical protein PDE_05603 [Penicillium oxalicum 114-2]
PDE_05606	1784	39.6733	102.913	1.37519	Up	0.850538	K01754|1|0.0|848|pcs:Pc13g07730|threonine dehydratase [EC:4.3.1.19]	-	GO:0016841//ammonia-lyase activity;GO:0043168//anion binding	GO:0006549//isoleucine metabolic process	gi|525584404|gb|EPS30654.1|/0/hypothetical protein PDE_05606 [Penicillium oxalicum 114-2]
PDE_05646	2308	24.0733	77.47	1.6862	Up	0.865853	K14209|1|0.0|871|pcs:Pc13g07160|solute carrier family 36 (proton-coupled amino acid transporter)	GO:0016020//membrane	-	-	gi|525584444|gb|EPS30694.1|/0/hypothetical protein PDE_05646 [Penicillium oxalicum 114-2]
PDE_05655	538	2849.3	757.767	-1.91078	Down	0.939691	-	-	-	GO:0075259;GO:0001897	gi|525584453|gb|EPS30703.1|/1.55866e-74/hypothetical protein PDE_05655 [Penicillium oxalicum 114-2]
PDE_05699	3246	99.5433	47.1633	-1.07766	Down	0.802141	K19849|1|3e-11|72.0|kaf:KAFR_0F03470|signaling mucin MSB2	-	-	-	gi|525584497|gb|EPS30747.1|/0/hypothetical protein PDE_05699 [Penicillium oxalicum 114-2]
PDE_05711	1068	272.75	116.06	-1.23271	Down	0.860067	-	-	-	-	gi|525584509|gb|EPS30759.1|/6.83056e-151/hypothetical protein PDE_05711 [Penicillium oxalicum 114-2]
PDE_05712	1062	29.0833	71.6833	1.30145	Up	0.818103	K01082|1|8e-134|477|pcs:Pc13g06360|3'(2'), 5'-bisphosphate nucleotidase [EC:3.1.3.7]	-	-	-	gi|525584510|gb|EPS30760.1|/0/hypothetical protein PDE_05712 [Penicillium oxalicum 114-2]
PDE_05715	942	480.097	116.993	-2.0369	Down	0.938006	K14688|1|2e-107|389|ani:AN7036.2|solute carrier family 30 (zinc transporter), member 1;K07059|2|2e-18|94.0|cgr:CAGL0J05962g|uncharacterized protein	-	GO:0046914//transition metal ion binding	-	gi|525584513|gb|EPS30763.1|/4.56841e-177/hypothetical protein PDE_05715 [Penicillium oxalicum 114-2]
PDE_05719	225	64.41	0.78	-6.36767	Down	0.933071	-	-	-	-	gi|525584517|gb|EPS30767.1|/6.11179e-25/hypothetical protein PDE_05719 [Penicillium oxalicum 114-2]
PDE_05720	696	69.3467	0.82	-6.40206	Down	0.937019	-	-	-	-	gi|525584518|gb|EPS30768.1|/1.85329e-106/hypothetical protein PDE_05720 [Penicillium oxalicum 114-2]
PDE_05721	815	21.2667	0.13	-7.35394	Down	0.834559	-	-	-	-	gi|525584519|gb|EPS30769.1|/3.91367e-35/hypothetical protein PDE_05721 [Penicillium oxalicum 114-2]
PDE_05738	1096	15.5133	301.843	4.28222	Up	0.962851	-	-	-	-	gi|525584536|gb|EPS30786.1|/9.67653e-124/hypothetical protein PDE_05738 [Penicillium oxalicum 114-2]
PDE_05793	856	144.85	58.28	-1.31349	Down	0.855796	-	-	-	-	gi|525584591|gb|EPS30841.1|/1.06068e-116/hypothetical protein PDE_05793 [Penicillium oxalicum 114-2]
PDE_05824	2629	10.8133	58.8333	2.44382	Up	0.880794	-	-	-	-	gi|525584622|gb|EPS30872.1|/0/hypothetical protein PDE_05824 [Penicillium oxalicum 114-2]
PDE_05881	558	1221.19	143.097	-3.09322	Down	0.962817	-	-	-	-	gi|525584678|gb|EPS30928.1|/5.58203e-87/hypothetical protein PDE_05881 [Penicillium oxalicum 114-2]
PDE_05882	804	1094.33	140.767	-2.95867	Down	0.961286	-	-	-	-	gi|525584679|gb|EPS30929.1|/1.02109e-104/hypothetical protein PDE_05882 [Penicillium oxalicum 114-2]
PDE_05884	1233	49.1767	3.85	-3.67504	Down	0.888163	K20403|1|6e-06|52.8|wic:J056_000856|TELO2-interacting protein 1	-	GO:0016787//hydrolase activity	GO:0008152//metabolic process	gi|525584681|gb|EPS30931.1|/6.36628e-160/hypothetical protein PDE_05884 [Penicillium oxalicum 114-2]
PDE_05885	2291	131.847	2.61667	-5.65499	Down	0.957287	K00463|1|2e-11|72.4|cmt:CCM_02833|indoleamine 2,3-dioxygenase [EC:1.13.11.52]	-	-	-	gi|525584682|gb|EPS30932.1|/0/hypothetical protein PDE_05885 [Penicillium oxalicum 114-2]
PDE_05886	1684	212.813	4.97	-5.4202	Down	0.967021	K17827|1|4e-46|154|nfi:NFIA_093730|fumitremorgin C synthase [EC:1.14.21.10];K10438|5|2e-34|127|fpu:FPSE_10099|3-hydroxyphenylacetate 6-hydroxylase [EC:1.14.13.63]	-	GO:0046914//transition metal ion binding;GO:0016491//oxidoreductase activity;GO:0046906//tetrapyrrole binding	GO:0044710	gi|525584683|gb|EPS30933.1|/0/hypothetical protein PDE_05886 [Penicillium oxalicum 114-2]
PDE_05888	1484	162.057	11.8167	-3.7776	Down	0.94597	-	-	-	-	gi|525584684|gb|EPS30934.1|/8.53639e-152/hypothetical protein PDE_05888 [Penicillium oxalicum 114-2]
PDE_05889	1287	203.343	13.4067	-3.9229	Down	0.953169	K01667|1|7e-108|391|ela:UCREL1_916|tryptophanase [EC:4.1.99.1]	-	-	-	gi|525584685|gb|EPS30935.1|/0/hypothetical protein PDE_05889 [Penicillium oxalicum 114-2]
PDE_05892	333	5.27667	101.55	4.26642	Up	0.935658	-	-	-	-	gi|525584688|gb|EPS30938.1|/1.16379e-44/hypothetical protein PDE_05892 [Penicillium oxalicum 114-2]
PDE_05900	609	653.293	206.937	-1.65854	Down	0.921329	-	-	-	-	gi|525584696|gb|EPS30946.1|/1.04735e-114/hypothetical protein PDE_05900 [Penicillium oxalicum 114-2]
PDE_05901	772	3195.17	1216.17	-1.39355	Down	0.89822	K14686|1|4e-37|147|nhe:NECHADRAFT_73427|solute carrier family 31 (copper transporter), member 1	-	-	-	gi|525584697|gb|EPS30947.1|/3.07924e-71/hypothetical protein PDE_05901 [Penicillium oxalicum 114-2]
PDE_05907	1842	10.48	88.8	3.08292	Up	0.916956	K00463|1|2e-146|285|tve:TRV_00864|indoleamine 2,3-dioxygenase [EC:1.13.11.52]	-	-	-	gi|525584703|gb|EPS30953.1|/0/hypothetical protein PDE_05907 [Penicillium oxalicum 114-2]
PDE_05909	680	150.36	55.8133	-1.42974	Down	0.871384	K02152|1|1e-20|100|pcs:Pc21g12120|V-type H+-transporting ATPase subunit G	-	-	-	gi|525584705|gb|EPS30955.1|/6.13564e-27/hypothetical protein PDE_05909 [Penicillium oxalicum 114-2]
PDE_05921	2012	406.7	196.057	-1.05269	Down	0.833793	K09553|1|0.0|635|pcs:Pc21g12770|stress-induced-phosphoprotein 1	-	-	-	gi|525584717|gb|EPS30967.1|/0/hypothetical protein PDE_05921 [Penicillium oxalicum 114-2]
PDE_05929	366	72.0933	1108.29	3.94233	Up	0.970033	-	-	-	-	gi|525584725|gb|EPS30975.1|/7.4175e-07/hypothetical protein PDE_05929 [Penicillium oxalicum 114-2]
PDE_05937	1656	89.0533	265.677	1.57693	Up	0.902304	K08158|1|5e-68|259|pfj:MYCFIDRAFT_135024|MFS transporter, DHA1 family, multidrug resistance protein	GO:0031224//intrinsic component of membrane	-	GO:0044763	gi|525584733|gb|EPS30983.1|/0/hypothetical protein PDE_05937 [Penicillium oxalicum 114-2]
PDE_05941	1120	31.3233	6.79	-2.20575	Down	0.811211	K05986|1|1e-69|263|aor:AOR_1_1366164|nuclease S1 [EC:3.1.30.1]	-	GO:0004518//nuclease activity;GO:0097159//organic cyclic compound binding	GO:0006259//DNA metabolic process	gi|525584737|gb|EPS30987.1|/0/hypothetical protein PDE_05941 [Penicillium oxalicum 114-2]
PDE_05949	2121	958.893	29.0133	-5.04658	Down	0.97895	-	-	-	-	gi|525584745|gb|EPS30995.1|/1.00683e-158/hypothetical protein PDE_05949 [Penicillium oxalicum 114-2]
PDE_05951	1047	56.5133	11.6267	-2.28115	Down	0.872354	-	-	GO:0016747//transferase activity, transferring acyl groups other than amino-acyl groups	-	gi|525584747|gb|EPS30997.1|/0/hypothetical protein PDE_05951 [Penicillium oxalicum 114-2]
PDE_05973	1767	166.36	82.1033	-1.0188	Down	0.808216	-	-	-	-	gi|924882424|gb|KOS38668.1|/1.65172e-134/hypothetical protein ACN38_g10495 [Penicillium nordicum]
PDE_05978	2084	14.17	120.863	3.09246	Up	0.930076	K03305|1|0.0|737|pcs:Pc21g13580|proton-dependent oligopeptide transporter, POT family	GO:0031224//intrinsic component of membrane	-	GO:0015833//peptide transport	gi|859271439|emb|CEJ55029.1|/0/Putative MFS peptide transporter [Penicillium brasilianum]
PDE_05986	1541	171.61	763.327	2.15317	Up	0.945562	K01870|1|3e-35|115|pbl:PAAG_12584|isoleucyl-tRNA synthetase [EC:6.1.1.5]	-	-	-	gi|525584782|gb|EPS31032.1|/1.94303e-116/hypothetical protein PDE_05986 [Penicillium oxalicum 114-2]
PDE_06017	1251	91.1467	19.74	-2.20707	Down	0.900722	-	-	GO:0003824//catalytic activity	GO:0044710	gi|525584813|gb|EPS31063.1|/0/hypothetical protein PDE_06017 [Penicillium oxalicum 114-2]
PDE_06032	2076	4.06667	63.6833	3.969	Up	0.909673	-	-	-	-	gi|525584828|gb|EPS31078.1|/0/hypothetical protein PDE_06032 [Penicillium oxalicum 114-2]
PDE_06034	900	207.05	1057.2	2.3522	Up	0.951977	-	-	-	-	gi|525584830|gb|EPS31080.1|/1.40904e-156/hypothetical protein PDE_06034 [Penicillium oxalicum 114-2]
PDE_06035	576	592.463	2190.99	1.88678	Up	0.938483	-	-	-	-	gi|525584831|gb|EPS31081.1|/2.25821e-89/hypothetical protein PDE_06035 [Penicillium oxalicum 114-2]
PDE_06056	952	24.6867	63.4533	1.36196	Up	0.81749	-	-	-	-	gi|846912389|gb|KMK58257.1|/2.6884e-99/hypothetical protein Y699_03677 [Aspergillus fumigatus Z5]
PDE_06064	909	98.4233	37.7633	-1.38201	Down	0.848274	K10901|1|1e-12|74.3|cthr:CTHT_0061140|bloom syndrome protein [EC:3.6.4.12]	-	-	-	gi|525584859|gb|EPS31109.1|/4.50086e-126/hypothetical protein PDE_06064 [Penicillium oxalicum 114-2]
PDE_06067	1359	110.8	48.6367	-1.18784	Down	0.826765	K06113|1|4e-10|66.6|pcs:Pc20g04270|arabinan endo-1,5-alpha-L-arabinosidase [EC:3.2.1.99]	-	GO:0016798//hydrolase activity, acting on glycosyl bonds;GO:0005488//binding	GO:0044238//primary metabolic process	gi|685427611|gb|AIO06737.1|/0/alpha-L-arabinofuranosidase 3 [Penicillium oxalicum]
PDE_06069	1447	49.8133	16.71	-1.57582	Down	0.821608	K00480|1|1e-15|85.5|aor:AOR_1_198034|salicylate hydroxylase [EC:1.14.13.1]	-	GO:0016709//oxidoreductase activity, acting on paired donors, with incorporation or reduction of molecular oxygen, NAD(P)H as one donor, and incorporation of one atom of oxygen	GO:0044710	gi|525584864|gb|EPS31114.1|/0/hypothetical protein PDE_06069 [Penicillium oxalicum 114-2]
PDE_06074	747	56.5567	179.76	1.6683	Up	0.900705	K09958|1|1e-55|216|nfi:NFIA_048560|uncharacterized protein	-	-	-	gi|525584869|gb|EPS31119.1|/1.06081e-65/hypothetical protein PDE_06074 [Penicillium oxalicum 114-2]
PDE_06089	710	670.45	1480.3	1.14268	Up	0.859319	-	-	-	-	gi|525584884|gb|EPS31134.1|/2.3127e-74/hypothetical protein PDE_06089 [Penicillium oxalicum 114-2]
PDE_06091	2212	386.3	171.44	-1.17202	Down	0.855524	K00521|1|4e-91|233|afm:AFUA_4G03940|ferric-chelate reductase [EC:1.16.1.7]	-	-	-	gi|525584886|gb|EPS31136.1|/0/hypothetical protein PDE_06091 [Penicillium oxalicum 114-2]
PDE_06092	282	71.6633	16.35	-2.13194	Down	0.884896	-	-	-	-	gi|525584887|gb|EPS31137.1|/4.46743e-36/hypothetical protein PDE_06092 [Penicillium oxalicum 114-2]
PDE_06095	1791	277.04	119.333	-1.2151	Down	0.858638	K14708|1|2e-81|303|cmt:CCM_00881|solute carrier family 26 (sodium-independent sulfate anion transporter), member 11;K01952|2|4e-81|303|pno:SNOG_10851|phosphoribosylformylglycinamidine synthase [EC:6.3.5.3];K10866|3|7e-47|189|nhe:NECHADRAFT_65858|DNA repair protein RAD50 [EC:3.6.-.-];K13095|4|6e-40|166|fgr:FGSG_02080|splicing factor 1;K16066|5|1e-11|72.4|cthr:CTHT_0033850|3-hydroxy acid dehydrogen…	-	-	-	gi|525584890|gb|EPS31140.1|/0/hypothetical protein PDE_06095 [Penicillium oxalicum 114-2]
PDE_06096	1832	3438.9	1142.64	-1.58958	Down	0.920393	K08197|1|5e-48|193|psq:PUNSTDRAFT_124252|MFS transporter, SIT family, siderophore-iron:H+ symporter	GO:0031224//intrinsic component of membrane	-	GO:0044763	gi|525584891|gb|EPS31141.1|/0/hypothetical protein PDE_06096 [Penicillium oxalicum 114-2]
PDE_06097	350	6446.02	2762.03	-1.22268	Down	0.875094	-	-	-	-	gi|525584892|gb|EPS31142.1|/1.04714e-24/hypothetical protein PDE_06097 [Penicillium oxalicum 114-2]
PDE_06121	3075	4.59667	32.9433	2.84133	Up	0.836958	K02429|1|2e-75|285|ssl:SS1G_12449|MFS transporter, FHS family, L-fucose permease	-	-	-	gi|525584916|gb|EPS31166.1|/0/hypothetical protein PDE_06121 [Penicillium oxalicum 114-2]
PDE_06124	1434	939.443	361.193	-1.37903	Down	0.89383	K01210|1|6e-16|86.3|nfi:NFIA_032650|glucan 1,3-beta-glucosidase [EC:3.2.1.58]	-	-	-	gi|525584919|gb|EPS31169.1|/0/peptidoglycan binding domain-containing protein [Penicillium oxalicum 114-2]
PDE_06133	700	102.75	234.577	1.19092	Up	0.850691	K04488|1|9e-46|165|kla:KLLA0D07161g|nitrogen fixation protein NifU and related proteins	-	GO:0046914//transition metal ion binding;GO:0051540	GO:0009058//biosynthetic process	gi|525584928|gb|EPS31178.1|/1.42453e-91/hypothetical protein PDE_06133 [Penicillium oxalicum 114-2]
PDE_06138	1369	2785.48	1301.07	-1.09822	Down	0.853073	-	-	-	-	gi|525584933|gb|EPS31183.1|/9.34447e-180/Ecm33 domain-containing protein [Penicillium oxalicum 114-2]
PDE_06146	2425	80.18	292.323	1.86625	Up	0.92332	K01953|1|0.0|735|afm:AFUA_4G06900|asparagine synthase (glutamine-hydrolysing) [EC:6.3.5.4]	GO:0044424	GO:0016884//carbon-nitrogen ligase activity, with glutamine as amido-N-donor;GO:0032550	GO:0006529//asparagine biosynthetic process	gi|525584941|gb|EPS31191.1|/0/hypothetical protein PDE_06146 [Penicillium oxalicum 114-2]
PDE_06154	1685	48.94	2.41333	-4.34192	Down	0.895753	-	-	-	-	gi|525584949|gb|EPS31199.1|/0/hypothetical protein PDE_06154 [Penicillium oxalicum 114-2]
PDE_06171	3607	22.9967	123.767	2.42813	Up	0.92007	K15371|1|0.0|1676|pcs:Pc22g08300|glutamate dehydrogenase [EC:1.4.1.2]	GO:0043231//intracellular membrane-bounded organelle	GO:0036094//small molecule binding;GO:0016639//oxidoreductase activity, acting on the CH-NH2 group of donors, NAD or NADP as acceptor	GO:0006103//2-oxoglutarate metabolic process	gi|525584966|gb|EPS31216.1|/0/hypothetical protein PDE_06171 [Penicillium oxalicum 114-2]
PDE_06173	822	7.99333	39.84	2.31735	Up	0.841689	K15053|1|4e-51|201|ure:UREG_04858|charged multivesicular body protein 7;K15334|2|6e-24|111|bcom:BAUCODRAFT_20558|multisite-specific tRNA:(cytosine-C5)-methyltransferase [EC:2.1.1.202]	-	GO:0003824//catalytic activity	-	gi|525584968|gb|EPS31218.1|/4.26008e-162/hypothetical protein PDE_06173 [Penicillium oxalicum 114-2]
PDE_06210	552	78.19	331.817	2.08533	Up	0.935215	-	-	-	-	gi|525585005|gb|EPS31255.1|/1.12186e-92/hypothetical protein PDE_06210 [Penicillium oxalicum 114-2]
PDE_06222	1062	54.65	14.83	-1.8817	Down	0.851746	K15541|1|3e-31|136|aor:AOR_1_1332164|protein MPE1;K15428|3|3e-24|113|maj:MAA_05655|Cys-Gly metallodipeptidase DUG1 [EC:3.4.13.-]	-	-	-	gi|525585017|gb|EPS31267.1|/6.75278e-159/hypothetical protein PDE_06222 [Penicillium oxalicum 114-2]
PDE_06265	1820	83.68	332.85	1.99192	Up	0.929974	K05917|1|0.0|729|pcs:Pc20g09070|sterol 14-demethylase [EC:1.14.13.70]	GO:0043231//intracellular membrane-bounded organelle	GO:0046906//tetrapyrrole binding;GO:0046914//transition metal ion binding;GO:0016709//oxidoreductase activity, acting on paired donors, with incorporation or reduction of molecular oxygen, NAD(P)H as one donor, and incorporation of one atom of oxygen;GO:0016741	GO:0008204//ergosterol metabolic process	gi|525585060|gb|EPS31310.1|/0/hypothetical protein PDE_06265 [Penicillium oxalicum 114-2]
PDE_06276	2302	39.3067	101.147	1.3636	Up	0.847645	K15118|1|4e-14|80.9|wic:J056_004821|solute carrier family 25, member 38;K20100|2|1e-05|53.1|nte:NEUTE1DRAFT124901|YTH domain-containing protein 1	-	-	-	gi|525585071|gb|EPS31321.1|/0/hypothetical protein PDE_06276 [Penicillium oxalicum 114-2]
PDE_06287	1347	8.43	34.59	2.03675	Up	0.814853	K17508|1|1e-158|560|pcs:Pc20g09270|protein phosphatase PTC7 [EC:3.1.3.16]	-	-	-	gi|525585082|gb|EPS31332.1|/0/hypothetical protein PDE_06287 [Penicillium oxalicum 114-2]
PDE_06337	1686	91.3867	11.49	-2.9916	Down	0.916786	K01876|1|3e-17|90.9|pan:PODANSg3375|aspartyl-tRNA synthetase [EC:6.1.1.12]	-	-	-	gi|525585132|gb|EPS31382.1|/0/hypothetical protein PDE_06337 [Penicillium oxalicum 114-2]
PDE_06338	1192	57.3133	7.75	-2.8866	Down	0.88915	-	-	-	-	gi|525585133|gb|EPS31383.1|/5.53731e-59/hypothetical protein PDE_06338 [Penicillium oxalicum 114-2]
PDE_06345	2944	35.4433	223.61	2.6574	Up	0.941682	-	-	-	-	gi|525585140|gb|EPS31390.1|/0/hypothetical protein PDE_06345 [Penicillium oxalicum 114-2]
PDE_06351	4448	28.2133	191.913	2.76601	Up	0.939197	-	-	-	-	gi|525585146|gb|EPS31396.1|/0/hypothetical protein PDE_06351 [Penicillium oxalicum 114-2]
PDE_06378	708	6.21333	32.76	2.3985	Up	0.824246	-	-	-	-	gi|525585173|gb|EPS31423.1|/8.19734e-17/hypothetical protein PDE_06378 [Penicillium oxalicum 114-2]
PDE_06380	1884	12.52	40.61	1.6976	Up	0.81099	K08900|1|9e-132|471|pcs:Pc12g01320|mitochondrial chaperone BCS1	-	-	-	gi|525585175|gb|EPS31425.1|/0/hypothetical protein PDE_06380 [Penicillium oxalicum 114-2]
PDE_06391	312	98.6833	11.21	-3.13802	Down	0.922214	-	-	-	-	gi|525585186|gb|EPS31436.1|/4.22617e-34/hypothetical protein PDE_06391 [Penicillium oxalicum 114-2]
PDE_06396	1430	29.69	148.313	2.3206	Up	0.923218	K00606|1|2e-37|157|wic:J056_003735|3-methyl-2-oxobutanoate hydroxymethyltransferase [EC:2.1.2.11];K14209|2|4e-07|57.0|adl:AURDEDRAFT_113873|solute carrier family 36 (proton-coupled amino acid transporter);K15015|3|6e-07|56.2|dsq:DICSQDRAFT_158402|solute carrier family 32 (vesicular inhibitory amino acid transporter)	GO:0031224//intrinsic component of membrane	-	-	gi|525585191|gb|EPS31441.1|/0/hypothetical protein PDE_06396 [Penicillium oxalicum 114-2]
PDE_06397	1623	146.71	816.893	2.47718	Up	0.953152	K08139|1|3e-114|412|dha:DEHA2B14278g|MFS transporter, SP family, sugar:H+ symporter	GO:0031224//intrinsic component of membrane	GO:0022857//transmembrane transporter activity	GO:0051234//establishment of localization;GO:0044763	gi|525585192|gb|EPS31442.1|/0/hypothetical protein PDE_06397 [Penicillium oxalicum 114-2]
PDE_06411	420	11.2767	52.8133	2.22756	Up	0.864696	-	-	-	-	gi|525585206|gb|EPS31456.1|/5.66526e-76/hypothetical protein PDE_06411 [Penicillium oxalicum 114-2]
PDE_06412	1023	5.26667	32.3367	2.61821	Up	0.829828	-	-	-	-	gi|525585207|gb|EPS31457.1|/1.62023e-178/hypothetical protein PDE_06412 [Penicillium oxalicum 114-2]
PDE_06414	1220	13.3033	84.8033	2.67233	Up	0.908754	-	-	-	-	gi|525585209|gb|EPS31459.1|/1.96008e-161/hypothetical protein PDE_06414 [Penicillium oxalicum 114-2]
PDE_06415	1927	0.176667	65.77	8.54026	Up	0.942107	K10866|1|9e-51|136|nhe:NECHADRAFT_65858|DNA repair protein RAD50 [EC:3.6.-.-];K13095|3|1e-30|109|fgr:FGSG_02080|splicing factor 1;K01952|5|8e-25|94.7|pno:SNOG_10851|phosphoribosylformylglycinamidine synthase [EC:6.3.5.3]	-	-	-	gi|525585210|gb|EPS31460.1|/0/hypothetical protein PDE_06415 [Penicillium oxalicum 114-2]
PDE_06429	2547	10.9433	109.227	3.3192	Up	0.929515	K10798|1|5e-152|296|aor:AOR_1_602154|poly [ADP-ribose] polymerase [EC:2.4.2.30]	-	-	-	gi|525585224|gb|EPS31474.1|/0/hypothetical protein PDE_06429 [Penicillium oxalicum 114-2]
PDE_06436	1611	52.1233	15.0967	-1.7877	Down	0.842335	-	-	-	-	gi|525585231|gb|EPS31481.1|/4.61726e-41/hypothetical protein PDE_06436 [Penicillium oxalicum 114-2]
PDE_06441	1734	1914	818.713	-1.22516	Down	0.8754	K01210|1|3e-39|164|pic:PICST_89695|glucan 1,3-beta-glucosidase [EC:3.2.1.58];K00654|3|2e-12|74.7|val:VDBG_07422|serine palmitoyltransferase [EC:2.3.1.50];K01199|4|5e-12|73.6|bcom:BAUCODRAFT_94024|glucan endo-1,3-beta-D-glucosidase [EC:3.2.1.39]	-	GO:0003824//catalytic activity	GO:0008152//metabolic process	gi|525585236|gb|EPS31486.1|/1.62139e-172/putative beta-1,3-glucanosyltransferase [Penicillium oxalicum 114-2]
PDE_06474	1357	122.293	58	-1.07622	Down	0.8115	K00295|1|3e-111|382|ang:ANI_1_982144|methylenetetrahydrofolate dehydrogenase (NAD+) [EC:1.5.1.15]	GO:0044444//cytoplasmic part	GO:0016646//oxidoreductase activity, acting on the CH-NH group of donors, NAD or NADP as acceptor;GO:0036094//small molecule binding	GO:0006144//purine nucleobase metabolic process;GO:0006760//folic acid-containing compound metabolic process	gi|525585269|gb|EPS31519.1|/1.76676e-121/hypothetical protein PDE_06474 [Penicillium oxalicum 114-2]
PDE_06492	1746	484.067	151.093	-1.67977	Down	0.919747	-	-	-	-	gi|525585287|gb|EPS31537.1|/4.66793e-137/hypothetical protein PDE_06492 [Penicillium oxalicum 114-2]
PDE_06493	249	372.797	126.847	-1.5553	Down	0.90535	-	-	-	-	gi|525585288|gb|EPS31538.1|/3.39483e-28/hypothetical protein PDE_06493 [Penicillium oxalicum 114-2]
PDE_06496	949	93.6633	20.4267	-2.19703	Down	0.901998	-	-	-	-	gi|525585291|gb|EPS31541.1|/2.32363e-172/hypothetical protein PDE_06496 [Penicillium oxalicum 114-2]
PDE_06504	905	9.41333	66.8133	2.82736	Up	0.898458	-	-	-	-	gi|525585299|gb|EPS31549.1|/1.23086e-161/hypothetical protein PDE_06504 [Penicillium oxalicum 114-2]
PDE_06517	2139	11.2767	50.96	2.17602	Up	0.860714	K09235|1|2e-07|58.9|ncs:NCAS_0A02160|zinc finger protein RME1;K09202|2|4e-06|54.3|mgr:MGG_04328|regulatory protein SWI5;K11215|4|7e-06|53.5|ttt:THITE_2068603|transcription factor STE12;K09238|5|7e-06|53.5|lth:KLTH0G12254g|metallothionein expression activator	-	-	-	gi|525585312|gb|EPS31562.1|/0/hypothetical protein PDE_06517 [Penicillium oxalicum 114-2]
PDE_06527	806	883.147	33.9267	-4.70216	Down	0.975427	-	-	-	-	gi|525585322|gb|EPS31572.1|/6.54574e-27/hypothetical protein PDE_06527 [Penicillium oxalicum 114-2]
PDE_06558	3021	43.8633	6.80333	-2.6887	Down	0.862722	K15340|1|0.0|903|ani:AN7589.2|DNA cross-link repair 1A protein;K12621|2|7e-156|552|ure:UREG_01331|U6 snRNA-associated Sm-like protein LSm2	-	-	-	gi|525585353|gb|EPS31603.1|/0/hypothetical protein PDE_06558 [Penicillium oxalicum 114-2]
PDE_06562	2373	13.8667	55.3633	1.99731	Up	0.858621	-	-	-	GO:0044763	gi|525585357|gb|EPS31607.1|/0/hypothetical protein PDE_06562 [Penicillium oxalicum 114-2]
PDE_06566	4048	29.8167	1.01667	-4.8742	Down	0.854843	K01183|1|2e-173|521|ttt:THITE_162651|chitinase [EC:3.2.1.14]	-	GO:0016798//hydrolase activity, acting on glycosyl bonds	GO:0008152//metabolic process	gi|525585361|gb|EPS31611.1|/0/putative chitinase [Penicillium oxalicum 114-2]
PDE_06567	2402	19.0533	0.393333	-5.59815	Down	0.806548	K01183|1|3e-08|61.6|npa:UCRNP2_5851|chitinase [EC:3.2.1.14]	-	-	-	gi|525585362|gb|EPS31612.1|/0/chitin binding domain- and peptidoglycan binding domain-containing protein [Penicillium oxalicum 114-2]
PDE_06571	642	103.82	290.61	1.485	Up	0.892043	-	-	GO:0016829//lyase activity	-	gi|924890004|gb|KOS45973.1|/5.64174e-52/hypothetical protein ACN38_g3040 [Penicillium nordicum]
PDE_06586	798	971.843	2260.22	1.21767	Up	0.874056	K17742|1|7e-133|473|tve:TRV_00610|sorbose reductase [EC:1.1.1.289]	-	GO:0036094//small molecule binding;GO:0003824//catalytic activity	GO:0044710	gi|525585381|gb|EPS31631.1|/3.56595e-150/hypothetical protein PDE_06586 [Penicillium oxalicum 114-2]
PDE_06596	1058	40.7167	131.873	1.69546	Up	0.892502	-	-	-	-	gi|525585391|gb|EPS31641.1|/1.28431e-115/hypothetical protein PDE_06596 [Penicillium oxalicum 114-2]
PDE_06609	714	20.7667	0.793333	-4.7102	Down	0.80905	-	-	-	-	gi|525585402|gb|EPS31652.1|/1.30006e-102/hypothetical protein PDE_06609 [Penicillium oxalicum 114-2]
PDE_06619	1856	26.51	124.297	2.22918	Up	0.914829	K03441|1|2e-128|365|afv:AFLA_138670|aquaglyceroporin related protein, other eukaryote	-	-	-	gi|525585412|gb|EPS31662.1|/0/hypothetical protein PDE_06619 [Penicillium oxalicum 114-2]
PDE_06674	1972	1.59667	25.1067	3.97494	Up	0.823634	K08197|1|2e-46|188|ela:UCREL1_2138|MFS transporter, SIT family, siderophore-iron:H+ symporter	-	-	-	gi|525585467|gb|EPS31717.1|/0/hypothetical protein PDE_06674 [Penicillium oxalicum 114-2]
PDE_06677	651	187.487	91.35	-1.03731	Down	0.816946	-	-	-	-	gi|525585470|gb|EPS31720.1|/1.0708e-118/hypothetical protein PDE_06677 [Penicillium oxalicum 114-2]
PDE_06680	2609	3.73667	88.4533	4.56509	Up	0.932391	K08712|1|3e-35|75.1|kaf:KAFR_0C00820|ATP-binding cassette, subfamily G (WHITE), member 2, SNQ2	-	GO:0017111//nucleoside-triphosphatase activity;GO:0032550	GO:0009154//purine ribonucleotide catabolic process	gi|525585473|gb|EPS31723.1|/0/hypothetical protein PDE_06680 [Penicillium oxalicum 114-2]
PDE_06683	1493	53.4533	155.12	1.53703	Up	0.88367	K17741|1|3e-06|53.9|zro:ZYRO0F05214g|NADPH-dependent methylglyoxal reductase [EC:1.1.1.283]	-	-	-	gi|525585476|gb|EPS31726.1|/1.09909e-69/hypothetical protein PDE_06683 [Penicillium oxalicum 114-2]
PDE_06684	395	20.7267	60.33	1.54139	Up	0.833112	-	-	-	-	gi|525585477|gb|EPS31727.1|/1.32851e-43/hypothetical protein PDE_06684 [Penicillium oxalicum 114-2]
PDE_06706	3643	30.31	273.99	3.17626	Up	0.951994	K17863|1|0.0|1233|nfi:NFIA_105320|linoleate 8R-lipoxygenase / 9,12-octadecadienoate 8-hydroperoxide 8R-isomerase [EC:1.13.11.60 5.4.4.5]	-	GO:0046872//metal ion binding;GO:0016702//oxidoreductase activity, acting on single donors with incorporation of molecular oxygen, incorporation of two atoms of oxygen	GO:0008152//metabolic process	gi|525585499|gb|EPS31749.1|/0/hypothetical protein PDE_06706 [Penicillium oxalicum 114-2]
PDE_06715	408	125.41	639.413	2.3501	Up	0.949272	-	-	-	-	gi|525585508|gb|EPS31758.1|/3.03845e-77/hypothetical protein PDE_06715 [Penicillium oxalicum 114-2]
PDE_06722	409	21.5367	94.33	2.13092	Up	0.900075	-	-	-	-	gi|525585514|gb|EPS31764.1|/1.93967e-48/hypothetical protein PDE_06722 [Penicillium oxalicum 114-2]
PDE_06737	1396	12.8033	152.537	3.57456	Up	0.942329	K01078|1|2e-145|365|afm:AFUA_8G01910|acid phosphatase [EC:3.1.3.2];K20048|5|8e-57|170|pno:SNOG_05930|actin cytoskeleton-regulatory complex protein END3	-	GO:0016791//phosphatase activity	GO:0006796//phosphate-containing compound metabolic process	gi|525585529|gb|EPS31779.1|/0/hypothetical protein PDE_06737 [Penicillium oxalicum 114-2]
PDE_06751	1302	20.9667	55.4367	1.40274	Up	0.810598	K00273|1|2e-33|144|afm:AFUA_5G13940|D-amino-acid oxidase [EC:1.4.3.3];K14566|5|6e-33|142|ani:AN6939.2|U3 small nucleolar RNA-associated protein 24	-	-	-	gi|525585543|gb|EPS31793.1|/2.38555e-140/hypothetical protein PDE_06751 [Penicillium oxalicum 114-2]
PDE_06752	1408	8.06	62.23	2.94876	Up	0.89577	K10256|1|4e-117|296|ani:AN7204.2|omega-6 fatty acid desaturase / acyl-lipid omega-6 desaturase (Delta-12 desaturase) [EC:1.14.19.6 1.14.19.22]	-	-	-	gi|525585544|gb|EPS31794.1|/0/hypothetical protein PDE_06752 [Penicillium oxalicum 114-2]
PDE_06782	1747	31.8767	112.893	1.82439	Up	0.893727	K08257|1|3e-145|516|pcs:Pc16g02660|mannan endo-1,6-alpha-mannosidase [EC:3.2.1.101]	-	GO:0003824//catalytic activity	-	gi|525585574|gb|EPS31824.1|/0/putative alpha-1,6-mannanase [Penicillium oxalicum 114-2]
PDE_06800	884	2213.12	455.133	-2.28172	Down	0.951943	-	-	-	-	gi|859262397|emb|CEJ59104.1|/1.58192e-68/hypothetical protein PMG11_07740 [Penicillium brasilianum]
PDE_06801	945	37.1633	8.63333	-2.10589	Down	0.826612	-	-	-	-	gi|525585593|gb|EPS31843.1|/1.98008e-172/hypothetical protein PDE_06801 [Penicillium oxalicum 114-2]
PDE_06802	661	3861.26	649.207	-2.57232	Down	0.959108	-	-	-	-	gi|525585594|gb|EPS31844.1|/4.26589e-22/hypothetical protein PDE_06802 [Penicillium oxalicum 114-2]
PDE_06803	1181	15.82	102.773	2.69964	Up	0.918079	K06027|1|4e-50|199|pno:SNOG_03196|vesicle-fusing ATPase [EC:3.6.4.6]	-	-	-	gi|525585595|gb|EPS31845.1|/7.06549e-144/hypothetical protein PDE_06803 [Penicillium oxalicum 114-2]
PDE_06814	1804	36.5767	5.77	-2.66428	Down	0.843476	K01078|1|6e-14|80.1|kla:KLLA0B14839g|acid phosphatase [EC:3.1.3.2]	-	-	-	gi|525585606|gb|EPS31856.1|/3.00607e-96/hypothetical protein PDE_06814 [Penicillium oxalicum 114-2]
PDE_06826	1406	138.643	56.6633	-1.29089	Down	0.851304	K16938|1|2e-135|167|bcom:BAUCODRAFT_138488|septin 3/9/12	GO:0032156//septin cytoskeleton;GO:0016020//membrane;GO:0005819//spindle;GO:0042763;GO:0000399;GO:0005937//mating projection	GO:0032550;GO:0005515//protein binding;GO:0017111//nucleoside-triphosphatase activity;GO:0035091//phosphatidylinositol binding	GO:0009154//purine ribonucleotide catabolic process;GO:0044767//single-organism developmental process;GO:0000087//mitotic M phase;GO:0031106//septin ring organization;GO:0000910//cytokinesis	gi|936415982|gb|KPM44287.1|/3.0492e-140/Septin spn2 [Neonectria ditissima]
PDE_06829	282	8.11333	78.36	3.27175	Up	0.913638	-	-	-	-	gi|525585621|gb|EPS31871.1|/1.48031e-47/hypothetical protein PDE_06829 [Penicillium oxalicum 114-2]
PDE_06831	2525	75.2667	206.623	1.45692	Up	0.883041	K00111|1|0.0|716|act:ACLA_026750|glycerol-3-phosphate dehydrogenase [EC:1.1.5.3]	GO:0043234//protein complex	GO:0052590//sn-glycerol-3-phosphate:ubiquinone oxidoreductase activity	GO:0044710;GO:0052646	gi|525585623|gb|EPS31873.1|/0/hypothetical protein PDE_06831 [Penicillium oxalicum 114-2]
PDE_06833	633	326.29	82.3067	-1.98707	Down	0.929685	-	-	-	-	gi|525585625|gb|EPS31875.1|/9.19363e-56/hypothetical protein PDE_06833 [Penicillium oxalicum 114-2]
PDE_06834	357	960.807	436.167	-1.13937	Down	0.857906	-	-	-	-	gi|525585626|gb|EPS31876.1|/4.07506e-29/hypothetical protein PDE_06834 [Penicillium oxalicum 114-2]
PDE_06848	411	17.9333	52.24	1.54251	Up	0.820673	K00274|1|6e-08|56.2|ztr:MYCGRDRAFT_88816|monoamine oxidase [EC:1.4.3.4]	-	-	-	gi|525585640|gb|EPS31890.1|/1.40741e-74/hypothetical protein PDE_06848 [Penicillium oxalicum 114-2]
PDE_06868	1057	28.7833	132.353	2.20109	Up	0.916633	K15114|1|2e-137|462|pcs:Pc16g01080|mitochondrial ornithine carrier protein	-	-	-	gi|525585659|gb|EPS31909.1|/1.5642e-178/hypothetical protein PDE_06868 [Penicillium oxalicum 114-2]
PDE_06888	2655	3.23333	29.9433	3.21114	Up	0.833691	K14688|1|6e-49|196|cmt:CCM_08718|solute carrier family 30 (zinc transporter), member 1;K15385|2|9e-27|123|ure:UREG_06498|aspyridone synthetase trans-acting enoyl reductase;K09241|4|7e-09|63.9|tre:TRIREDRAFT_47479|transcriptional regulatory protein GAL4	-	GO:0005488//binding	GO:0006351//transcription, DNA-templated	gi|525585679|gb|EPS31929.1|/0/hypothetical protein PDE_06888 [Penicillium oxalicum 114-2]
PDE_06899	2328	2.44333	131.293	5.7478	Up	0.957967	K03305|1|5e-135|200|pcs:Pc16g00660|proton-dependent oligopeptide transporter, POT family	GO:0031224//intrinsic component of membrane	-	GO:0015833//peptide transport	gi|525585690|gb|EPS31940.1|/0/hypothetical protein PDE_06899 [Penicillium oxalicum 114-2]
PDE_06915	1274	13.69	45.26	1.72511	Up	0.824382	K00002|1|1e-92|340|afm:AFUA_1G09750|alcohol dehydrogenase (NADP+) [EC:1.1.1.2];K18107|5|4e-57|189|val:VDBG_03238|L-glyceraldehyde reductase [EC:1.1.1.372]	-	-	-	gi|525585706|gb|EPS31956.1|/6.92213e-168/hypothetical protein PDE_06915 [Penicillium oxalicum 114-2]
PDE_06929	2232	385.51	8.5	-5.50316	Down	0.976601	-	-	-	-	gi|525585720|gb|EPS31970.1|/0/hypothetical protein PDE_06929 [Penicillium oxalicum 114-2]
PDE_06948	2560	3.20333	24.3333	2.92529	Up	0.8026	K09248|1|6e-29|118|tbl:TBLA_0A00730|proline utilization trans-activator	GO:0043231//intracellular membrane-bounded organelle	GO:0003676//nucleic acid binding;GO:0046914//transition metal ion binding;GO:0003700//transcription factor activity, sequence-specific DNA binding	GO:0006366//transcription from RNA polymerase II promoter	gi|525585739|gb|EPS31989.1|/0/hypothetical protein PDE_06948 [Penicillium oxalicum 114-2]
PDE_06954	2115	44.34	122.827	1.46994	Up	0.867368	K07300|1|3e-155|524|nfi:NFIA_082080|Ca2+:H+ antiporter	-	-	-	gi|525585745|gb|EPS31995.1|/0/hypothetical protein PDE_06954 [Penicillium oxalicum 114-2]
PDE_06972	1941	61.7267	5.30333	-3.54092	Down	0.903053	K17826|1|4e-51|203|pcs:Pc21g15450|fumitremorgin C monooxygenase [EC:1.14.13.177];K18388|4|3e-41|170|afv:AFLA_045540|cytochrome P450 monooxygenase [EC:1.14.13.-]	-	GO:0016491//oxidoreductase activity;GO:0005488//binding	-	gi|525585763|gb|EPS32013.1|/0/hypothetical protein PDE_06972 [Penicillium oxalicum 114-2]
PDE_06974	1110	83.85	25.4367	-1.7209	Down	0.872966	K01304|1|5e-14|79.3|tml:GSTUM_00004643001|pyroglutamyl-peptidase [EC:3.4.19.3]	-	-	-	gi|525585765|gb|EPS32015.1|/3.16608e-138/hypothetical protein PDE_06974 [Penicillium oxalicum 114-2]
PDE_07020	1297	219.337	74.2633	-1.56243	Down	0.895582	K00830|1|6e-163|574|pcs:Pc16g02790|alanine-glyoxylate transaminase / serine-glyoxylate transaminase / serine-pyruvate transaminase [EC:2.6.1.44 2.6.1.45 2.6.1.51]	GO:0043231//intracellular membrane-bounded organelle	GO:0043168//anion binding;GO:0008483//transaminase activity	GO:0006545//glycine biosynthetic process	gi|525585811|gb|EPS32061.1|/0/hypothetical protein PDE_07020 [Penicillium oxalicum 114-2]
PDE_07054	863	70.5	24.21	-1.54202	Down	0.845177	-	-	-	-	gi|525585845|gb|EPS32095.1|/7.55936e-138/hypothetical protein PDE_07054 [Penicillium oxalicum 114-2]
PDE_07063	955	28.09	2.77667	-3.33863	Down	0.828432	-	-	-	-	gi|525585854|gb|EPS32104.1|/2.51322e-123/hypothetical protein PDE_07063 [Penicillium oxalicum 114-2]
PDE_07080	1911	3.15333	81.0233	4.68339	Up	0.929583	K01209|1|0.0|562|pcs:Pc16g05680|alpha-N-arabinofuranosidase [EC:3.2.1.55]	-	GO:0016798//hydrolase activity, acting on glycosyl bonds	GO:0044723;GO:0000272//polysaccharide catabolic process	gi|525585871|gb|EPS32121.1|/0/putative alpha-L-arabinofuranosidase [Penicillium oxalicum 114-2]
PDE_07081	2016	9.62667	35.94	1.90048	Up	0.811075	K08139|1|2e-49|114|dha:DEHA2C11374g|MFS transporter, SP family, sugar:H+ symporter	GO:0031224//intrinsic component of membrane	GO:0022857//transmembrane transporter activity	GO:0044765//single-organism transport;GO:0044763	gi|525585872|gb|EPS32122.1|/0/hypothetical protein PDE_07081 [Penicillium oxalicum 114-2]
PDE_07086	1089	18.3967	49.53	1.42886	Up	0.802838	-	-	-	-	gi|525585877|gb|EPS32127.1|/0/hypothetical protein PDE_07086 [Penicillium oxalicum 114-2]
PDE_07104	1551	65.08	23.1767	-1.48954	Down	0.832721	K13953|1|3e-60|233|nfi:NFIA_081330|alcohol dehydrogenase, propanol-preferring [EC:1.1.1.1]	-	GO:0015932//nucleobase-containing compound transmembrane transporter activity	GO:0044765//single-organism transport	gi|525585895|gb|EPS32145.1|/0/hypothetical protein PDE_07104 [Penicillium oxalicum 114-2]
PDE_07138	2596	42.2067	7.21333	-2.54873	Down	0.855711	-	-	-	-	gi|525585928|gb|EPS32178.1|/0/hypothetical protein PDE_07138 [Penicillium oxalicum 114-2]
PDE_07161	2571	15.4533	70.67	2.19318	Up	0.886172	-	GO:0016020//membrane;GO:0005739//mitochondrion	-	-	gi|525585951|gb|EPS32201.1|/0/hypothetical protein PDE_07161 [Penicillium oxalicum 114-2]
PDE_07163	18838	149.347	54.7	-1.44905	Down	0.873154	K18281|1|0.0|907|aor:AOR_1_760134|brevianamide F synthase	-	-	-	gi|525585953|gb|EPS32203.1|/0/hypothetical protein PDE_07163 [Penicillium oxalicum 114-2]
PDE_07170	1486	21.9167	105.58	2.26824	Up	0.908822	-	-	-	-	gi|525585960|gb|EPS32210.1|/0/hypothetical protein PDE_07170 [Penicillium oxalicum 114-2]
PDE_07202	411	1248.58	2603.98	1.06043	Up	0.844616	-	-	-	-	gi|525585992|gb|EPS32242.1|/6.40611e-27/hypothetical protein PDE_07202 [Penicillium oxalicum 114-2]
PDE_07217	1531	37.42	111.447	1.57447	Up	0.874736	K00605|1|0.0|552|pcs:Pc16g07470|aminomethyltransferase [EC:2.1.2.10]	GO:0044424	GO:0016769//transferase activity, transferring nitrogenous groups;GO:0008168//methyltransferase activity	GO:0006544//glycine metabolic process	gi|525586007|gb|EPS32257.1|/0/hypothetical protein PDE_07217 [Penicillium oxalicum 114-2]
PDE_07218	1773	5.86333	44.5167	2.92455	Up	0.868729	K00606|1|2e-25|106|wic:J056_003735|3-methyl-2-oxobutanoate hydroxymethyltransferase [EC:2.1.2.11]	GO:0016020//membrane	-	-	gi|859264153|emb|CEJ58908.1|/0/Putative Amino acid transporter [Penicillium brasilianum]
PDE_07227	4074	72.0233	21.8267	-1.72237	Down	0.863284	K10352|1|4e-09|52.4|adl:AURDEDRAFT_64804|myosin heavy chain;K09291|3|1e-08|63.5|pbl:PAAG_11966|nucleoprotein TPR;K20361|5|2e-08|63.2|kaf:KAFR_0G03200|intracellular protein transport protein USO1	-	-	-	gi|525586017|gb|EPS32267.1|/0/hypothetical protein PDE_07227 [Penicillium oxalicum 114-2]
PDE_07261	1897	93.0367	226.103	1.28111	Up	0.864015	K01426|1|0.0|606|aor:AOR_1_1756054|amidase [EC:3.5.1.4]	-	GO:0016879//ligase activity, forming carbon-nitrogen bonds	-	gi|115399428|ref|XP_001215303.1|/0/conserved hypothetical protein [Aspergillus terreus NIH2624]
PDE_07262	1452	113.29	239.587	1.08053	Up	0.831393	K02920|1|8e-10|65.9|ani:AN4452.2|large subunit ribosomal protein L36e;K06110|3|4e-07|57.0|cthr:CTHT_0001930|exocyst complex component 3	-	-	-	gi|992087810|ref|XP_015407430.1|/5.98829e-97/hypothetical protein ANOM_005244 [Aspergillus nomius NRRL 13137]
PDE_07263	1055	923.82	364.447	-1.3419	Down	0.889541	K00213|1|4e-58|225|afv:AFLA_065740|7-dehydrocholesterol reductase [EC:1.3.1.21]	-	-	-	gi|525586053|gb|EPS32303.1|/4.39345e-155/hypothetical protein PDE_07263 [Penicillium oxalicum 114-2]
PDE_07271	687	16.0333	70.62	2.139	Up	0.884334	-	-	-	-	gi|525586061|gb|EPS32311.1|/7.50498e-129/hypothetical protein PDE_07271 [Penicillium oxalicum 114-2]
PDE_07273	816	137.473	39.0467	-1.81588	Down	0.901487	-	-	-	-	gi|525586063|gb|EPS32313.1|/1.23903e-113/hypothetical protein PDE_07273 [Penicillium oxalicum 114-2]
PDE_07274	765	174.123	50.28	-1.79205	Down	0.907052	-	-	-	-	gi|525586064|gb|EPS32314.1|/5.06159e-143/hypothetical protein PDE_07274 [Penicillium oxalicum 114-2]
PDE_07275	602	92.17	21.2367	-2.11774	Down	0.898407	-	-	-	-	gi|525586065|gb|EPS32315.1|/3.20632e-28/hypothetical protein PDE_07275 [Penicillium oxalicum 114-2]
PDE_07341	1140	115.293	55.6533	-1.05077	Down	0.802753	K11483|1|2e-06|54.3|smp:SMAC_04812|histone deacetylase HOS2 [EC:3.5.1.98]	-	-	-	gi|525586131|gb|EPS32381.1|/0/hypothetical protein PDE_07341 [Penicillium oxalicum 114-2]
PDE_07344	1326	248.16	22.97	-3.43345	Down	0.952386	K06004|1|1e-123|444|afm:AFUA_5G13300|aspergillopepsin I [EC:3.4.23.18]	-	GO:0016787//hydrolase activity	-	gi|525586134|gb|EPS32384.1|/0/hypothetical protein PDE_07344 [Penicillium oxalicum 114-2]
PDE_07354	1203	60.89	16.4133	-1.89134	Down	0.861105	-	-	-	-	gi|525586144|gb|EPS32394.1|/0/hypothetical protein PDE_07354 [Penicillium oxalicum 114-2]
PDE_07413	1619	7.46333	34.76	2.21954	Up	0.823821	-	-	-	-	gi|525586203|gb|EPS32453.1|/0/hypothetical protein PDE_07413 [Penicillium oxalicum 114-2]
PDE_07423	2093	47.4833	107.447	1.17813	Up	0.823463	K03231|1|2e-09|65.1|bor:COCMIDRAFT_41086|elongation factor 1-alpha;K02358|2|4e-09|64.3|spo:SPBC9B6.04c|elongation factor Tu	-	GO:0017111//nucleoside-triphosphatase activity;GO:0032550	GO:0009154//purine ribonucleotide catabolic process	gi|525586213|gb|EPS32463.1|/0/hypothetical protein PDE_07423 [Penicillium oxalicum 114-2]
PDE_07427	343	123.59	53.05	-1.22014	Down	0.836447	-	-	-	-	gi|525586217|gb|EPS32467.1|/4.03822e-42/hypothetical protein PDE_07427 [Penicillium oxalicum 114-2]
PDE_07430	530	121.447	479.28	1.98055	Up	0.934518	-	-	-	-	gi|525586220|gb|EPS32470.1|/1.22637e-34/hypothetical protein PDE_07430 [Penicillium oxalicum 114-2]
PDE_07439	1213	138.003	46.08	-1.58249	Down	0.884878	K03305|1|2e-19|97.8|afv:AFLA_064320|proton-dependent oligopeptide transporter, POT family;K01069|2|1e-15|85.1|ani:AN6840.2|hydroxyacylglutathione hydrolase [EC:3.1.2.6];K04125|3|3e-14|80.1|pic:PICST_51972|gibberellin 2-oxidase [EC:1.14.11.13]	-	GO:0016705//oxidoreductase activity, acting on paired donors, with incorporation or reduction of molecular oxygen;GO:0046914//transition metal ion binding	GO:0044710	gi|525586229|gb|EPS32479.1|/1.10659e-179/hypothetical protein PDE_07439 [Penicillium oxalicum 114-2]
PDE_07441	1246	51.0067	12.93	-1.97996	Down	0.850606	K03392|1|2e-21|104|aor:AOR_1_112134|aminocarboxymuconate-semialdehyde decarboxylase [EC:4.1.1.45]	-	-	-	gi|525586231|gb|EPS32481.1|/0/hypothetical protein PDE_07441 [Penicillium oxalicum 114-2]
PDE_07454	446	199.997	40.83	-2.29227	Down	0.930349	K01920|1|3e-08|57.4|ure:UREG_04364|glutathione synthase [EC:6.3.2.3]	-	-	-	gi|525586244|gb|EPS32494.1|/6.80996e-53/hypothetical protein PDE_07454 [Penicillium oxalicum 114-2]
PDE_07462	1611	66.2567	163.327	1.30162	Up	0.858366	K04125|1|4e-13|77.0|pic:PICST_51972|gibberellin 2-oxidase [EC:1.14.11.13]	-	-	-	gi|525586252|gb|EPS32502.1|/7.40182e-140/hypothetical protein PDE_07462 [Penicillium oxalicum 114-2]
PDE_07470	771	221.35	74.6867	-1.56741	Down	0.896722	K00851|1|1e-06|46.2|pgr:PGTG_17060|gluconokinase [EC:2.7.1.12]	-	-	-	gi|525586260|gb|EPS32510.1|/1.19226e-79/hypothetical protein PDE_07470 [Penicillium oxalicum 114-2]
PDE_07473	1514	84.5967	184.06	1.1215	Up	0.832448	K10808|1|0.0|653|ang:ANI_1_944124|ribonucleoside-diphosphate reductase subunit M2 [EC:1.17.4.1]	-	GO:0016491//oxidoreductase activity	GO:0044710	gi|525586263|gb|EPS32513.1|/0/hypothetical protein PDE_07473 [Penicillium oxalicum 114-2]
PDE_07484	1567	28.83	0.1	-8.17143	Down	0.87329	K11427|1|0.0|546|pcs:Pc21g07230|histone-lysine N-methyltransferase, H3 lysine-79 specific [EC:2.1.1.43]	-	GO:0008168//methyltransferase activity	GO:0016568//chromatin modification;GO:0032259//methylation;GO:0006351//transcription, DNA-templated	gi|525586274|gb|EPS32524.1|/0/hypothetical protein PDE_07484 [Penicillium oxalicum 114-2]
PDE_07533	1181	23.08	112.663	2.2873	Up	0.912157	-	GO:0005622//intracellular	GO:0046914//transition metal ion binding;GO:0003676//nucleic acid binding	-	gi|525586323|gb|EPS32573.1|/1.37404e-110/hypothetical protein PDE_07533 [Penicillium oxalicum 114-2]
PDE_07542	2604	23.5833	70.45	1.57883	Up	0.850248	K10356|1|3e-30|134|cci:CC1G_13719|myosin I	-	-	-	gi|525586332|gb|EPS32582.1|/0/hypothetical protein PDE_07542 [Penicillium oxalicum 114-2]
PDE_07561	222	19.9067	73.5633	1.88574	Up	0.8746	-	-	-	-	gi|525586351|gb|EPS32601.1|/6.12671e-25/hypothetical protein PDE_07561 [Penicillium oxalicum 114-2]
PDE_07602	2441	184.2	59.7733	-1.6237	Down	0.897948	K14642|1|4e-94|334|ppa:PAS_chr1-1_0063|golgi apyrase [EC:3.6.1.5]	-	GO:0003824//catalytic activity	-	gi|525586392|gb|EPS32642.1|/0/hypothetical protein PDE_07602 [Penicillium oxalicum 114-2]
PDE_07615	1056	261.35	94.9433	-1.46084	Down	0.888061	-	-	-	-	gi|525586405|gb|EPS32655.1|/9.68397e-150/hypothetical protein PDE_07615 [Penicillium oxalicum 114-2]
PDE_07634	5433	83.78	15.2867	-2.45433	Down	0.902934	-	-	-	-	gi|525586424|gb|EPS32674.1|/0/hypothetical protein PDE_07634 [Penicillium oxalicum 114-2]
PDE_07648	843	46.8033	151.263	1.69238	Up	0.896944	K07975|1|9e-50|95.5|lbc:LACBIDRAFT_192259|Rho family, other;K04513|4|6e-49|97.1|pgu:PGUG_01737|Ras homolog gene family, member A	GO:0044464	GO:0032550	GO:0035556//intracellular signal transduction	gi|525586438|gb|EPS32688.1|/1.20863e-107/hypothetical protein PDE_07648 [Penicillium oxalicum 114-2]
PDE_07684	536	49.02	9.74	-2.33138	Down	0.862603	-	-	-	-	gi|525586474|gb|EPS32724.1|/9.77628e-83/hypothetical protein PDE_07684 [Penicillium oxalicum 114-2]
PDE_07686	521	40.67	97.5133	1.26163	Up	0.831785	K03123|1|1e-33|139|ang:ANI_1_800134|transcription initiation factor TFIIA small subunit	-	-	GO:0006351//transcription, DNA-templated	gi|525586476|gb|EPS32726.1|/1.35912e-37/hypothetical protein PDE_07686 [Penicillium oxalicum 114-2]
PDE_07688	1981	32.3667	84.75	1.3887	Up	0.841042	K00844|1|1e-32|104|bor:COCMIDRAFT_22176|hexokinase [EC:2.7.1.1]	-	GO:0032550;GO:0016772//transferase activity, transferring phosphorus-containing groups	GO:0006796//phosphate-containing compound metabolic process;GO:0006007//glucose catabolic process	gi|525586478|gb|EPS32728.1|/0/hypothetical protein PDE_07688 [Penicillium oxalicum 114-2]
PDE_07700	554	165.513	334.6	1.01549	Up	0.823021	-	-	-	-	gi|525586490|gb|EPS32740.1|/1.67495e-26/hypothetical protein PDE_07700 [Penicillium oxalicum 114-2]
PDE_07705	2424	13.67	96.3267	2.81692	Up	0.917449	-	-	-	-	gi|525586495|gb|EPS32745.1|/0/hypothetical protein PDE_07705 [Penicillium oxalicum 114-2]
PDE_07707	1117	33.4733	108.557	1.69736	Up	0.884844	-	-	-	-	gi|525586497|gb|EPS32747.1|/0/hypothetical protein PDE_07707 [Penicillium oxalicum 114-2]
PDE_07708	5654	4.69667	77.7167	4.04851	Up	0.921517	K06694|1|6e-07|58.5|pte:PTT_10493|26S proteasome non-ATPase regulatory subunit 10	-	-	-	gi|525586498|gb|EPS32748.1|/0/hypothetical protein PDE_07708 [Penicillium oxalicum 114-2]
PDE_07727	1536	181.573	1225.17	2.75436	Up	0.959261	-	-	-	-	gi|525586517|gb|EPS32767.1|/0/hypothetical protein PDE_07727 [Penicillium oxalicum 114-2]
PDE_07740	1188	24.5367	141.52	2.52799	Up	0.92669	K03190|1|1e-124|446|pcs:Pc21g01990|urease accessory protein	-	-	-	gi|525586530|gb|EPS32780.1|/0/hypothetical protein PDE_07740 [Penicillium oxalicum 114-2]
PDE_07777	501	31.8833	235.97	2.88773	Up	0.946192	-	-	-	-	gi|525586567|gb|EPS32817.1|/1.45336e-100/hypothetical protein PDE_07777 [Penicillium oxalicum 114-2]
PDE_07778	1539	63.7967	145.727	1.19171	Up	0.837792	-	-	-	-	gi|902266052|emb|CRL30447.1|/6.01199e-83/unnamed protein product [Penicillium camemberti]
PDE_07787	3727	84.2367	223.743	1.40932	Up	0.879875	K01115|1|0.0|880|pcs:Pc21g01360|phospholipase D1/2 [EC:3.1.4.4]	-	-	-	gi|525586577|gb|EPS32827.1|/0/hypothetical protein PDE_07787 [Penicillium oxalicum 114-2]
PDE_07821	1608	15.46	173.647	3.48954	Up	0.945222	K08157|1|3e-126|452|tml:GSTUM_00008131001|MFS transporter, DHA1 family, multidrug resistance protein	GO:0031224//intrinsic component of membrane	-	GO:0044763	gi|525586610|gb|EPS32860.1|/0/hypothetical protein PDE_07821 [Penicillium oxalicum 114-2]
PDE_07830	2659	155.973	60.7167	-1.36113	Down	0.865173	K11399|1|2e-09|65.9|vpo:Kpol_505p28|chromatin modification-related protein EAF7;K14003|2|3e-07|58.5|cal:CaO19.10912|prolactin regulatory element-binding protein;K01183|4|2e-06|55.8|pan:PODANSg4492|chitinase [EC:3.2.1.14]	-	-	-	gi|525586619|gb|EPS32869.1|/0/hypothetical protein PDE_07830 [Penicillium oxalicum 114-2]
PDE_07863	831	511.2	132.833	-1.94427	Down	0.933599	-	-	-	-	gi|525586652|gb|EPS32902.1|/1.10314e-49/hypothetical protein PDE_07863 [Penicillium oxalicum 114-2]
PDE_07866	543	29.46	4.94	-2.57617	Down	0.817541	-	-	-	-	gi|525586655|gb|EPS32905.1|/1.61498e-104/hypothetical protein PDE_07866 [Penicillium oxalicum 114-2]
PDE_07867	804	34.68	6.19333	-2.48532	Down	0.833129	-	-	-	-	gi|525586656|gb|EPS32906.1|/1.72163e-144/hypothetical protein PDE_07867 [Penicillium oxalicum 114-2]
PDE_07868	653	2583.74	26.16	-6.62595	Down	0.992972	-	-	-	-	gi|525586657|gb|EPS32907.1|/3.30739e-27/hypothetical protein PDE_07868 [Penicillium oxalicum 114-2]
PDE_07871	1736	17.5633	60.06	1.77384	Up	0.852614	K08139|1|3e-67|233|dha:DEHA2C11374g|MFS transporter, SP family, sugar:H+ symporter	GO:0031224//intrinsic component of membrane	GO:0022857//transmembrane transporter activity	GO:0051234//establishment of localization;GO:0044763	gi|525586660|gb|EPS32910.1|/0/hypothetical protein PDE_07871 [Penicillium oxalicum 114-2]
PDE_07884	3297	50.2333	123.21	1.2944	Up	0.846828	K03316|1|0.0|875|mgr:MGG_05211|monovalent cation:H+ antiporter, CPA1 family	GO:0016020//membrane	GO:0015299//solute:proton antiporter activity	GO:0006812//cation transport	gi|525586673|gb|EPS32923.1|/0/hypothetical protein PDE_07884 [Penicillium oxalicum 114-2]
PDE_07886	1476	22.0567	0.17	-7.01954	Down	0.837179	K14454|1|5e-61|236|nhe:NECHADRAFT_10996|aspartate aminotransferase, cytoplasmic [EC:2.6.1.1];K00286|2|1e-45|184|npa:UCRNP2_9665|pyrroline-5-carboxylate reductase [EC:1.5.1.2];K00318|3|1e-32|141|spo:SPCC70.03c|proline dehydrogenase [EC:1.5.-.-]	-	-	GO:0044710	gi|525586675|gb|EPS32925.1|/0/hypothetical protein PDE_07886 [Penicillium oxalicum 114-2]
PDE_07911	783	2410.91	225.063	-3.42117	Down	0.967463	-	-	-	-	gi|525586700|gb|EPS32950.1|/2.00898e-41/hypothetical protein PDE_07911 [Penicillium oxalicum 114-2]
PDE_07922	2141	87.4667	189.15	1.11273	Up	0.831121	K01648|1|0.0|1090|pcs:Pc21g20480|ATP citrate (pro-S)-lyase [EC:2.3.3.8]	-	GO:0046912//transferase activity, transferring acyl groups, acyl groups converted into alkyl on transfer;GO:0036094//small molecule binding;GO:0004774//succinate-CoA ligase activity	GO:0005975//carbohydrate metabolic process	gi|525586711|gb|EPS32961.1|/0/hypothetical protein PDE_07922 [Penicillium oxalicum 114-2]
PDE_07924	1772	70.65	173.69	1.29775	Up	0.86005	K01648|1|8e-171|407|act:ACLA_084390|ATP citrate (pro-S)-lyase [EC:2.3.3.8]	-	GO:0032550;GO:0004774//succinate-CoA ligase activity	-	gi|525586713|gb|EPS32963.1|/0/hypothetical protein PDE_07924 [Penicillium oxalicum 114-2]
PDE_07933	816	91.9067	21.5733	-2.09092	Down	0.897301	-	-	GO:0004175//endopeptidase activity	GO:0019538//protein metabolic process	gi|525586722|gb|EPS32972.1|/2.83664e-134/hypothetical protein PDE_07933 [Penicillium oxalicum 114-2]
PDE_07951	1002	135.007	49.8467	-1.43746	Down	0.868695	K06001|1|3e-14|79.7|afv:AFLA_118070|tryptophan synthase beta chain [EC:4.2.1.20]	-	-	-	gi|525586740|gb|EPS32990.1|/3.06882e-158/hypothetical protein PDE_07951 [Penicillium oxalicum 114-2]
PDE_07953	1514	60.5533	130.227	1.10475	Up	0.817984	K01273|1|1e-162|573|pcs:Pc06g00090|membrane dipeptidase [EC:3.4.13.19]	-	GO:0008237//metallopeptidase activity;GO:0008238//exopeptidase activity	GO:0019538//protein metabolic process	gi|525586742|gb|EPS32992.1|/0/hypothetical protein PDE_07953 [Penicillium oxalicum 114-2]
PDE_07969	2027	7.19667	45.0067	2.64474	Up	0.864066	-	-	-	-	gi|525586758|gb|EPS33008.1|/0/hypothetical protein PDE_07969 [Penicillium oxalicum 114-2]
PDE_07989	1827	30.8167	5.88667	-2.38819	Down	0.816759	K19475|1|2e-07|58.5|lbc:LACBIDRAFT_311817|WAS/WASL-interacting protein;K05747|2|7e-07|56.6|cot:CORT_0G01250|Wiskott-Aldrich syndrome protein;K19851|3|7e-07|56.6|sce:YIR019C|flocculation protein FLO11;K14005|5|2e-06|51.6|cim:CIMG_05120|protein transport protein SEC31	-	-	-	gi|525586778|gb|EPS33028.1|/0/hypothetical protein PDE_07989 [Penicillium oxalicum 114-2]
PDE_07990	186	71.5533	9.18333	-2.96193	Down	0.904329	-	-	-	-	gi|525586779|gb|EPS33029.1|/3.9411e-16/hypothetical protein PDE_07990 [Penicillium oxalicum 114-2]
PDE_08001	567	112.773	31.2733	-1.85042	Down	0.895497	-	-	-	-	gi|525586790|gb|EPS33040.1|/3.23367e-69/hypothetical protein PDE_08001 [Penicillium oxalicum 114-2]
PDE_08009	1721	158.047	67.68	-1.22355	Down	0.84516	K15389|1|5e-68|155|pte:PTT_09367|acyl-CoA dehydrogenase	-	GO:0016627//oxidoreductase activity, acting on the CH-CH group of donors;GO:0000166//nucleotide binding;GO:0043169//cation binding;GO:0046906//tetrapyrrole binding	GO:0044710	gi|525586798|gb|EPS33048.1|/0/hypothetical protein PDE_08009 [Penicillium oxalicum 114-2]
PDE_08029	666	12.86	99.4633	2.95127	Up	0.920359	-	-	-	-	gi|525586817|gb|EPS33067.1|/5.675e-65/hypothetical protein PDE_08029 [Penicillium oxalicum 114-2]
PDE_08044	990	29.1433	4.37667	-2.73526	Down	0.820026	K18339|1|6e-117|421|pcs:Pc22g00220|2-keto-3-deoxy-L-rhamnonate aldolase [EC:4.1.2.53];K18103|5|3e-38|159|mbe:MBM_04252|L-threo-3-deoxy-hexylosonate aldolase [EC:4.1.2.54]	-	GO:0003824//catalytic activity	-	gi|525586832|gb|EPS33082.1|/1.14271e-157/hypothetical protein PDE_08044 [Penicillium oxalicum 114-2]
PDE_08057	978	44.5067	143.87	1.69267	Up	0.895293	K19932|1|2e-93|301|ang:ANI_1_140054|neuronal calcium sensor 1	-	GO:0046872//metal ion binding	-	gi|525586845|gb|EPS33095.1|/4.8764e-93/hypothetical protein PDE_08057 [Penicillium oxalicum 114-2]
PDE_08067	1164	5.11667	44.79	3.1299	Up	0.872677	-	-	-	-	gi|525586855|gb|EPS33105.1|/2.06346e-119/hypothetical protein PDE_08067 [Penicillium oxalicum 114-2]
PDE_08073	2007	20.1767	55.2133	1.45233	Up	0.815823	K09840|1|1e-58|228|val:VDBG_02459|9-cis-epoxycarotenoid dioxygenase [EC:1.13.11.51];K11159|3|2e-23|111|nhe:NECHADRAFT_83121|carotenoid cleavage dioxygenase;K17842|5|7e-11|70.1|bsc:COCSADRAFT_264699|torulene dioxygenase [EC:1.13.11.59]	-	-	-	gi|525586861|gb|EPS33111.1|/0/hypothetical protein PDE_08073 [Penicillium oxalicum 114-2]
PDE_08075	1139	854.88	294.593	-1.537	Down	0.910472	-	GO:0016020//membrane	-	-	gi|525586863|gb|EPS33113.1|/1.45921e-37/hypothetical protein PDE_08075 [Penicillium oxalicum 114-2]
PDE_08077	1707	21.3067	116.263	2.44802	Up	0.918028	-	-	-	-	gi|525586865|gb|EPS33115.1|/0/hypothetical protein PDE_08077 [Penicillium oxalicum 114-2]
PDE_08119	1569	56.7667	185.273	1.70654	Up	0.904023	-	-	-	-	gi|525586907|gb|EPS33157.1|/0/hypothetical protein PDE_08119 [Penicillium oxalicum 114-2]
PDE_08127	810	19.37	0.633333	-4.93472	Down	0.801732	K05609|1|1e-60|233|pcs:Pc16g01050|ubiquitin carboxyl-terminal hydrolase L3 [EC:3.4.19.12]	-	-	-	gi|525586915|gb|EPS33165.1|/1.21555e-129/hypothetical protein PDE_08127 [Penicillium oxalicum 114-2]
PDE_08154	1575	237.59	13.4633	-4.14137	Down	0.958104	-	-	-	-	gi|525586942|gb|EPS33192.1|/0/hypothetical protein PDE_08154 [Penicillium oxalicum 114-2]
PDE_08155	3008	319.55	41.68	-2.93861	Down	0.951246	K01904|1|2e-36|155|pfj:MYCFIDRAFT_39722|4-coumarate--CoA ligase [EC:6.2.1.12];K19951|2|5e-34|147|bsc:COCSADRAFT_198125|TBC1 domain family member 9;K15321|5|1e-33|146|afm:AFUA_2G17600|naphtho-gamma-pyrone polyketide synthase	-	GO:0016787//hydrolase activity	GO:0008152//metabolic process	gi|525586943|gb|EPS33193.1|/0/hypothetical protein PDE_08155 [Penicillium oxalicum 114-2]
PDE_08156	961	945.143	116.803	-3.01645	Down	0.961524	-	-	GO:0016491//oxidoreductase activity	-	gi|525586944|gb|EPS33194.1|/8.45619e-94/hypothetical protein PDE_08156 [Penicillium oxalicum 114-2]
PDE_08157	2208	255.85	83.5167	-1.61516	Down	0.905486	-	-	-	-	gi|525586945|gb|EPS33195.1|/0/hypothetical protein PDE_08157 [Penicillium oxalicum 114-2]
PDE_08159	607	697.41	81.28	-3.10103	Down	0.960367	-	-	-	-	gi|525586947|gb|EPS33197.1|/5.71018e-78/hypothetical protein PDE_08159 [Penicillium oxalicum 114-2]
PDE_08167	1596	28.5633	71.0633	1.31494	Up	0.818903	K15272|1|7e-146|518|pcs:Pc22g02140|solute carrier family 35 (UDP-sugar transporter), member A1/2/3	GO:0016020//membrane	-	GO:0006810//transport	gi|525586955|gb|EPS33205.1|/0/hypothetical protein PDE_08167 [Penicillium oxalicum 114-2]
PDE_08195	348	72.5733	15.1067	-2.26425	Down	0.889371	-	-	-	-	gi|525586983|gb|EPS33233.1|/9.40534e-50/hypothetical protein PDE_08195 [Penicillium oxalicum 114-2]
PDE_08261	225	59.01	20.85	-1.50091	Down	0.826458	-	-	-	-	gi|525587049|gb|EPS33299.1|/9.42915e-26/hypothetical protein PDE_08261 [Penicillium oxalicum 114-2]
PDE_08277	276	916.66	310.393	-1.56229	Down	0.913348	-	-	-	-	gi|525587065|gb|EPS33315.1|/2.91049e-35/hypothetical protein PDE_08277 [Penicillium oxalicum 114-2]
PDE_08289	2967	221.727	31.2067	-2.82886	Down	0.943979	-	-	-	-	gi|525587077|gb|EPS33327.1|/0/hypothetical protein PDE_08289 [Penicillium oxalicum 114-2]
PDE_08290	315	164.68	22.33	-2.88261	Down	0.937275	-	-	-	-	gi|525587078|gb|EPS33328.1|/9.07419e-37/hypothetical protein PDE_08290 [Penicillium oxalicum 114-2]
PDE_08291	282	143.777	16.3767	-3.13412	Down	0.936151	-	-	-	-	gi|525587079|gb|EPS33329.1|/6.64479e-48/hypothetical protein PDE_08291 [Penicillium oxalicum 114-2]
PDE_08297	1866	95.2767	23.85	-1.99813	Down	0.894612	K01637|1|0.0|551|pcs:Pc22g03660|isocitrate lyase [EC:4.1.3.1]	GO:0042579//microbody	GO:0016833//oxo-acid-lyase activity	GO:0009060//aerobic respiration;GO:0043436;GO:0044262//cellular carbohydrate metabolic process	gi|525587085|gb|EPS33335.1|/0/hypothetical protein PDE_08297 [Penicillium oxalicum 114-2]
PDE_08385	1525	62.2633	578.237	3.21521	Up	0.960775	K17095|1|5e-135|481|act:ACLA_073760|annexin A7/11	-	GO:0005543//phospholipid binding;GO:0046914//transition metal ion binding	-	gi|525587173|gb|EPS33423.1|/2.42635e-177/hypothetical protein PDE_08385 [Penicillium oxalicum 114-2]
PDE_08405	1452	12.7667	46.8067	1.87433	Up	0.837452	K07513|1|0.0|499|nfi:NFIA_104910|acetyl-CoA acyltransferase 1 [EC:2.3.1.16]	-	GO:0003988//acetyl-CoA C-acyltransferase activity	-	gi|525587193|gb|EPS33443.1|/0/hypothetical protein PDE_08405 [Penicillium oxalicum 114-2]
PDE_08418	459	58.9667	254.217	2.10809	Up	0.931421	-	-	-	-	gi|525587206|gb|EPS33456.1|/2.14558e-70/hypothetical protein PDE_08418 [Penicillium oxalicum 114-2]
PDE_08420	4016	21.0267	56.6767	1.43053	Up	0.815891	K01613|1|7e-07|57.8|adl:AURDEDRAFT_88100|phosphatidylserine decarboxylase [EC:4.1.1.65]	-	-	-	gi|525587208|gb|EPS33458.1|/0/hypothetical protein PDE_08420 [Penicillium oxalicum 114-2]
PDE_08423	993	162.04	521.657	1.68675	Up	0.921074	-	-	-	-	gi|525587211|gb|EPS33461.1|/2.33586e-126/hypothetical protein PDE_08423 [Penicillium oxalicum 114-2]
PDE_08426	2471	45.4067	102.407	1.17333	Up	0.819396	-	-	GO:0008233//peptidase activity	-	gi|525587214|gb|EPS33464.1|/0/hypothetical protein PDE_08426 [Penicillium oxalicum 114-2]
PDE_08437	4693	41.7133	127.54	1.61237	Up	0.8851	K00143|1|0.0|910|pcs:Pc22g06310|L-aminoadipate-semialdehyde dehydrogenase [EC:1.2.1.31]	-	GO:0016620//oxidoreductase activity, acting on the aldehyde or oxo group of donors, NAD or NADP as acceptor;GO:0019842//vitamin binding	GO:0009085//lysine biosynthetic process	gi|525587225|gb|EPS33475.1|/0/hypothetical protein PDE_08437 [Penicillium oxalicum 114-2]
PDE_08447	1486	15.3767	49.4833	1.6862	Up	0.830662	K07542|1|2e-143|436|pcs:Pc22g06140|phosphatidylinositol glycan, class V [EC:2.4.1.-]	-	-	-	gi|525587235|gb|EPS33485.1|/0/putative Dol-P-Man: alpha-1,6-mannosyltransferase [Penicillium oxalicum 114-2]
PDE_08454	2185	24.0267	88.4733	1.88061	Up	0.885117	K00864|1|0.0|716|pcs:Pc22g06070|glycerol kinase [EC:2.7.1.30]	-	GO:0016301//kinase activity	GO:0044238//primary metabolic process;GO:0052646	gi|525587242|gb|EPS33492.1|/0/hypothetical protein PDE_08454 [Penicillium oxalicum 114-2]
PDE_08476	1781	115.247	237.34	1.04223	Up	0.822102	K00293|1|0.0|535|pcs:Pc22g05800|saccharopine dehydrogenase (NADP+, L-glutamate forming) [EC:1.5.1.10]	-	GO:0036094//small molecule binding;GO:0003824//catalytic activity	GO:0044710	gi|525587264|gb|EPS33514.1|/0/hypothetical protein PDE_08476 [Penicillium oxalicum 114-2]
PDE_08478	4115	72.0533	208.607	1.53365	Up	0.890579	-	-	-	-	gi|525587266|gb|EPS33516.1|/0/hypothetical protein PDE_08478 [Penicillium oxalicum 114-2]
PDE_08479	777	10.21	36.33	1.83118	Up	0.808029	-	-	-	-	gi|525587267|gb|EPS33517.1|/3.67347e-57/hypothetical protein PDE_08479 [Penicillium oxalicum 114-2]
PDE_08481	1059	92.4833	218.507	1.24041	Up	0.857328	K03841|1|7e-177|620|pcs:Pc22g05750|fructose-1,6-bisphosphatase I [EC:3.1.3.11]	GO:0044444//cytoplasmic part	GO:0050308//sugar-phosphatase activity	GO:0044237//cellular metabolic process;GO:0006006//glucose metabolic process	gi|525587269|gb|EPS33519.1|/0/hypothetical protein PDE_08481 [Penicillium oxalicum 114-2]
PDE_08489	597	371.723	85.9867	-2.11204	Down	0.937411	-	-	-	-	gi|525587277|gb|EPS33527.1|/1.07916e-52/hypothetical protein PDE_08489 [Penicillium oxalicum 114-2]
PDE_08490	1858	428.293	105.227	-2.0251	Down	0.936236	-	-	-	-	gi|525587278|gb|EPS33528.1|/5.30575e-76/hypothetical protein PDE_08490 [Penicillium oxalicum 114-2]
PDE_08494	2697	1.48667	30.7167	4.36887	Up	0.851848	K10380|1|7e-19|97.1|maj:MAA_08755|ankyrin;K15502|3|4e-13|77.8|maw:MAC_02175|serine/threonine-protein phosphatase 6 regulatory ankyrin repeat subunit A;K16726|5|4e-12|74.7|pfj:MYCFIDRAFT_162040|ankyrin repeat domain-containing protein 17	-	-	-	gi|525587282|gb|EPS33532.1|/0/hypothetical protein PDE_08494 [Penicillium oxalicum 114-2]
PDE_08548	1882	25.0267	63.4533	1.34223	Up	0.814904	-	-	GO:0051536//iron-sulfur cluster binding;GO:0043169//cation binding	GO:0009058//biosynthetic process	gi|525587336|gb|EPS33586.1|/0/hypothetical protein PDE_08548 [Penicillium oxalicum 114-2]
PDE_08564	696	35.65	81.4233	1.19154	Up	0.810394	-	-	-	-	gi|525587352|gb|EPS33602.1|/7.82259e-89/hypothetical protein PDE_08564 [Penicillium oxalicum 114-2]
PDE_08572	1101	181.393	425.493	1.23002	Up	0.866755	K18097|1|5e-61|235|pfp:PFL1_06315|glycerol 2-dehydrogenase (NADP+) [EC:1.1.1.156];K18107|2|2e-60|233|abv:AGABI2DRAFT192853|L-glyceraldehyde reductase [EC:1.1.1.372]	-	GO:0003824//catalytic activity	GO:0044710	gi|525587360|gb|EPS33610.1|/0/hypothetical protein PDE_08572 [Penicillium oxalicum 114-2]
PDE_08600	2718	42.6933	94.3067	1.14335	Up	0.810105	-	-	-	-	gi|525587388|gb|EPS33638.1|/0/hypothetical protein PDE_08600 [Penicillium oxalicum 114-2]
PDE_08613	1202	208.523	32.15	-2.69732	Down	0.940338	-	-	-	-	gi|525587401|gb|EPS33651.1|/4.26114e-161/hypothetical protein PDE_08613 [Penicillium oxalicum 114-2]
PDE_08614	1547	65.9733	27.6433	-1.25495	Down	0.804881	-	-	-	-	gi|525587402|gb|EPS33652.1|/1.12403e-113/hypothetical protein PDE_08614 [Penicillium oxalicum 114-2]
PDE_08630	2057	91.98	230.907	1.32792	Up	0.87152	K00140|1|0.0|399|ang:ANI_1_1120014|malonate-semialdehyde dehydrogenase (acetylating) / methylmalonate-semialdehyde dehydrogenase [EC:1.2.1.18 1.2.1.27]	-	GO:0016620//oxidoreductase activity, acting on the aldehyde or oxo group of donors, NAD or NADP as acceptor	GO:0044710	gi|525587418|gb|EPS33668.1|/0/hypothetical protein PDE_08630 [Penicillium oxalicum 114-2]
PDE_08638	2077	49.5533	158.28	1.67542	Up	0.897863	K00838|1|0.0|576|pcs:Pc12g11860|aromatic amino acid aminotransferase I [EC:2.6.1.57 2.6.1.27 2.6.1.5]	-	GO:0043168//anion binding	GO:0008152//metabolic process	gi|525587426|gb|EPS33676.1|/0/hypothetical protein PDE_08638 [Penicillium oxalicum 114-2]
PDE_08647	792	124	54.4867	-1.18636	Down	0.831632	K01759|1|1e-54|213|nfi:NFIA_088750|lactoylglutathione lyase [EC:4.4.1.5]	-	-	-	gi|525587435|gb|EPS33685.1|/3.43407e-113/hypothetical protein PDE_08647 [Penicillium oxalicum 114-2]
PDE_08652	1465	92.3067	17.14	-2.42907	Down	0.907801	-	-	-	-	gi|525587440|gb|EPS33690.1|/0/hypothetical protein PDE_08652 [Penicillium oxalicum 114-2]
PDE_08660	1702	246.267	11.4033	-4.43269	Down	0.96115	K17645|1|2e-72|273|pan:PODANSg8563|averantin hydroxylase [EC:1.14.13.174];K17475|5|8e-47|189|act:ACLA_048760|tryprostatin B 6-hydroxylase [EC:1.14.13.176]	-	GO:0016491//oxidoreductase activity;GO:0005488//binding	-	gi|525587448|gb|EPS33698.1|/0/hypothetical protein PDE_08660 [Penicillium oxalicum 114-2]
PDE_08663	633	56.7733	11.3533	-2.3221	Down	0.874498	K20185|1|2e-32|139|pcs:Pc12g11640|biogenesis of lysosome-related organelles complex 1 subunit 1	-	-	-	gi|525587451|gb|EPS33701.1|/1.66386e-81/hypothetical protein PDE_08663 [Penicillium oxalicum 114-2]
PDE_08676	1538	12.1967	41.42	1.76384	Up	0.817507	K20247|1|2e-163|311|pcs:Pc12g11540|hercynylcysteine sulfoxide lyase [EC:4.4.1.-]	-	GO:0043168//anion binding;GO:0016740//transferase activity	-	gi|525587464|gb|EPS33714.1|/0/hypothetical protein PDE_08676 [Penicillium oxalicum 114-2]
PDE_08684	2157	90.32	253.117	1.48669	Up	0.890205	-	-	-	-	gi|525587472|gb|EPS33722.1|/0/hypothetical protein PDE_08684 [Penicillium oxalicum 114-2]
PDE_08698	2438	188.14	59.5733	-1.65907	Down	0.901743	K12765|1|0.0|1103|pcs:Pc12g07250|meiosis induction protein kinase IME2/SME1 [EC:2.7.11.1]	-	GO:0004672//protein kinase activity;GO:0032550	GO:0006796//phosphate-containing compound metabolic process;GO:0006464//cellular protein modification process	gi|525587486|gb|EPS33736.1|/0/hypothetical protein PDE_08698 [Penicillium oxalicum 114-2]
PDE_08706	458	4885.56	546.993	-3.15893	Down	0.965302	-	-	-	-	gi|525587494|gb|EPS33744.1|/3.60193e-22/hypothetical protein PDE_08706 [Penicillium oxalicum 114-2]
PDE_08707	1056	84.4833	15.9667	-2.4036	Down	0.902236	-	-	-	-	gi|525587495|gb|EPS33745.1|/8.46392e-154/hypothetical protein PDE_08707 [Penicillium oxalicum 114-2]
PDE_08708	861	927.19	362.33	-1.35556	Down	0.891702	-	-	-	GO:0019932//second-messenger-mediated signaling	gi|525587496|gb|EPS33746.1|/1.36007e-145/hypothetical protein PDE_08708 [Penicillium oxalicum 114-2]
PDE_08710	2238	68.8133	322.08	2.22666	Up	0.938738	-	-	-	-	gi|525587498|gb|EPS33748.1|/0/hypothetical protein PDE_08710 [Penicillium oxalicum 114-2]
PDE_08713	1297	9.22667	37.2333	2.01271	Up	0.821217	K13577|1|6e-115|414|ani:AN6254.2|solute carrier family 25 (mitochondrial dicarboxylate transporter), member 10	GO:0016020//membrane	-	GO:0006810//transport	gi|525587501|gb|EPS33751.1|/5.89342e-142/hypothetical protein PDE_08713 [Penicillium oxalicum 114-2]
PDE_08732	705	35.6067	560.45	3.97637	Up	0.966459	-	-	-	-	gi|525587520|gb|EPS33770.1|/2.22016e-115/hypothetical protein PDE_08732 [Penicillium oxalicum 114-2]
PDE_08743	862	45.7067	96.7	1.08111	Up	0.800694	K07005|1|3e-117|421|pcs:Pc12g08070|uncharacterized protein	-	GO:0003824//catalytic activity;GO:0032553//ribonucleotide binding	GO:0044710	gi|525587531|gb|EPS33781.1|/2.32531e-137/hypothetical protein PDE_08743 [Penicillium oxalicum 114-2]
PDE_08755	1938	328.393	686.783	1.06443	Up	0.840702	K00521|1|0.0|885|pcs:Pc16g06390|ferric-chelate reductase [EC:1.16.1.7]	GO:0016020//membrane	GO:0016491//oxidoreductase activity	-	gi|525587543|gb|EPS33793.1|/0/hypothetical protein PDE_08755 [Penicillium oxalicum 114-2]
PDE_08773	609	998.217	188.3	-2.40632	Down	0.952981	-	-	-	-	gi|525587561|gb|EPS33811.1|/2.281e-77/hypothetical protein PDE_08773 [Penicillium oxalicum 114-2]
PDE_08775	621	10.5067	35.5333	1.75787	Up	0.800847	-	-	-	-	gi|525587563|gb|EPS33813.1|/2.03849e-60/hypothetical protein PDE_08775 [Penicillium oxalicum 114-2]
PDE_08794	3991	27.1667	71.0767	1.38754	Up	0.829147	K20168|1|7e-32|140|ssl:SS1G_09016|TBC1 domain family member 15;K19690|3|4e-24|115|pgu:PGUG_04397|osomolarity two-component system, sensor histidine kinase CHK1 [EC:2.7.13.3];K19691|4|6e-23|111|cput:CONPUDRAFT_67834|osomolarity two-component system, sensor histidine kinase NIK1 [EC:2.7.13.3]	-	-	GO:0050794//regulation of cellular process	gi|525587582|gb|EPS33832.1|/0/hypothetical protein PDE_08794 [Penicillium oxalicum 114-2]
PDE_08795	1003	21.0967	60.9833	1.5314	Up	0.832551	K06210|1|3e-133|184|pcs:Pc12g08660|nicotinamide mononucleotide adenylyltransferase [EC:2.7.7.1 2.7.7.18]	-	GO:0016772//transferase activity, transferring phosphorus-containing groups	GO:0019359//nicotinamide nucleotide biosynthetic process	gi|525587583|gb|EPS33833.1|/2.62141e-154/hypothetical protein PDE_08795 [Penicillium oxalicum 114-2]
PDE_08803	1022	39.4667	184.137	2.22207	Up	0.92703	-	-	GO:0016791//phosphatase activity	GO:0016311//dephosphorylation	gi|525587591|gb|EPS33841.1|/8.7704e-92/hypothetical protein PDE_08803 [Penicillium oxalicum 114-2]
PDE_08813	1446	44.6033	446.04	3.32195	Up	0.959839	K14454|1|1e-63|244|nhe:NECHADRAFT_10996|aspartate aminotransferase, cytoplasmic [EC:2.6.1.1];K00286|2|1e-41|171|npa:UCRNP2_9665|pyrroline-5-carboxylate reductase [EC:1.5.1.2];K00318|3|3e-24|114|mrr:Moror_511|proline dehydrogenase [EC:1.5.-.-]	-	GO:0016645//oxidoreductase activity, acting on the CH-NH group of donors	GO:0006560//proline metabolic process;GO:0006536//glutamate metabolic process	gi|525587601|gb|EPS33851.1|/0/hypothetical protein PDE_08813 [Penicillium oxalicum 114-2]
PDE_08814	1938	94.4333	490.187	2.37596	Up	0.947927	K00294|1|0.0|689|pcs:Pc12g08900|1-pyrroline-5-carboxylate dehydrogenase [EC:1.2.1.88]	-	GO:0016646//oxidoreductase activity, acting on the CH-NH group of donors, NAD or NADP as acceptor;GO:0016903//oxidoreductase activity, acting on the aldehyde or oxo group of donors	GO:0006560//proline metabolic process	gi|525587602|gb|EPS33852.1|/0/hypothetical protein PDE_08814 [Penicillium oxalicum 114-2]
PDE_08821	1917	41.6767	140.157	1.74973	Up	0.898203	K16261|1|1e-35|152|fpu:FPSE_05313|yeast amino acid transporter;K07440|2|8e-27|122|fme:FOMMEDRAFT_142532|cholesterol 24-hydroxylase [EC:1.14.14.25];K14338|3|1e-26|122|fme:FOMMEDRAFT_107452|cytochrome P450 / NADPH-cytochrome P450 reductase [EC:1.14.14.1 1.6.2.4]	-	GO:0046914//transition metal ion binding;GO:0016491//oxidoreductase activity;GO:0046906//tetrapyrrole binding	GO:0044710	gi|525587609|gb|EPS33859.1|/0/hypothetical protein PDE_08821 [Penicillium oxalicum 114-2]
PDE_08847	1806	11.3767	37.3833	1.71632	Up	0.803468	K00387|1|0.0|999|ang:ANI_1_2276074|sulfite oxidase [EC:1.8.3.1]	-	-	-	gi|525587635|gb|EPS33885.1|/0/hypothetical protein PDE_08847 [Penicillium oxalicum 114-2]
PDE_08849	1232	1318.22	626.037	-1.07427	Down	0.84545	-	GO:0031224//intrinsic component of membrane	GO:0043169//cation binding;GO:0016682//oxidoreductase activity, acting on diphenols and related substances as donors, oxygen as acceptor	GO:0044710;GO:0044707;GO:0006091//generation of precursor metabolites and energy	gi|24061751|gb|AAN39883.1|/4.42674e-127/mitochondrial alternative oxidase [Aspergillus nidulans]
PDE_08850	1515	85.07	35.5867	-1.25731	Down	0.824025	-	-	-	-	gi|525587638|gb|EPS33888.1|/0/hypothetical protein PDE_08850 [Penicillium oxalicum 114-2]
PDE_08854	852	8.19333	32.1833	1.97379	Up	0.801732	K19589|1|1e-113|409|pcs:Pc12g10490|release factor glutamine methyltransferase [EC:2.1.1.297]	-	GO:0097159//organic cyclic compound binding;GO:0008168//methyltransferase activity	GO:0008213	gi|525587642|gb|EPS33892.1|/5.21984e-158/hypothetical protein PDE_08854 [Penicillium oxalicum 114-2]
PDE_08878	2469	92.6567	201.487	1.12072	Up	0.834848	K01610|1|0.0|848|ani:AN1918.2|phosphoenolpyruvate carboxykinase (ATP) [EC:4.1.1.49]	-	GO:0004611//phosphoenolpyruvate carboxykinase activity;GO:0032550;GO:0016772//transferase activity, transferring phosphorus-containing groups;GO:0000166//nucleotide binding	GO:0006796//phosphate-containing compound metabolic process;GO:0006006//glucose metabolic process	gi|525587666|gb|EPS33916.1|/0/hypothetical protein PDE_08878 [Penicillium oxalicum 114-2]
PDE_08890	791	66.29	181.673	1.45448	Up	0.879008	-	-	-	-	gi|525587678|gb|EPS33928.1|/3.21957e-79/hypothetical protein PDE_08890 [Penicillium oxalicum 114-2]
PDE_08892	1029	5.92	48.5633	3.0362	Up	0.878021	-	-	-	-	gi|525587680|gb|EPS33930.1|/0/hypothetical protein PDE_08892 [Penicillium oxalicum 114-2]
PDE_08904	1390	0.623333	48.6233	6.2855	Up	0.913825	K00457|1|0.0|377|pcs:Pc12g09060|4-hydroxyphenylpyruvate dioxygenase [EC:1.13.11.27]	-	GO:0043169//cation binding;GO:0016702//oxidoreductase activity, acting on single donors with incorporation of molecular oxygen, incorporation of two atoms of oxygen	GO:0006558//L-phenylalanine metabolic process;GO:0006570//tyrosine metabolic process	gi|525587692|gb|EPS33942.1|/0/hypothetical protein PDE_08904 [Penicillium oxalicum 114-2]
PDE_08905	786	1.01333	54.38	5.7459	Up	0.917296	-	-	-	-	gi|525587693|gb|EPS33943.1|/1.90712e-132/hypothetical protein PDE_08905 [Penicillium oxalicum 114-2]
PDE_08906	1561	12.8633	185.737	3.85192	Up	0.949833	K00451|1|0.0|433|afm:AFUA_2G04220|homogentisate 1,2-dioxygenase [EC:1.13.11.5]	-	GO:0043169//cation binding;GO:0016702//oxidoreductase activity, acting on single donors with incorporation of molecular oxygen, incorporation of two atoms of oxygen	GO:0006558//L-phenylalanine metabolic process;GO:0006570//tyrosine metabolic process	gi|70989409|ref|XP_749554.1|/0/homogentisate 1,2-dioxygenase (HmgA) [Aspergillus fumigatus Af293]
PDE_08907	1287	17.6833	402.2	4.50745	Up	0.968297	K01555|1|0.0|768|pcs:Pc12g09030|fumarylacetoacetase [EC:3.7.1.2]	-	GO:0016823//hydrolase activity, acting on acid carbon-carbon bonds, in ketonic substances	GO:0006520//cellular amino acid metabolic process	gi|525587695|gb|EPS33945.1|/0/hypothetical protein PDE_08907 [Penicillium oxalicum 114-2]
PDE_08908	681	0.213333	29.5467	7.11374	Up	0.872048	K01800|1|1e-87|322|pcs:Pc12g09020|maleylacetoacetate isomerase [EC:5.2.1.2]	GO:0044424	GO:0016859//cis-trans isomerase activity	GO:0006520//cellular amino acid metabolic process	gi|525587696|gb|EPS33946.1|/5.82642e-126/hypothetical protein PDE_08908 [Penicillium oxalicum 114-2]
PDE_08912	950	220.517	105.933	-1.05773	Down	0.824808	-	-	-	-	gi|525587700|gb|EPS33950.1|/1.33134e-65/hypothetical protein PDE_08912 [Penicillium oxalicum 114-2]
PDE_08917	1918	48.34	160.733	1.73338	Up	0.901487	K01426|1|0.0|552|pcs:Pc12g09880|amidase [EC:3.5.1.4]	-	GO:0016810//hydrolase activity, acting on carbon-nitrogen (but not peptide) bonds;GO:0016879//ligase activity, forming carbon-nitrogen bonds	-	gi|525587705|gb|EPS33955.1|/0/hypothetical protein PDE_08917 [Penicillium oxalicum 114-2]
PDE_08920	2667	34.2467	309.91	3.17781	Up	0.953815	-	-	GO:0016787//hydrolase activity	-	gi|525587708|gb|EPS33958.1|/0/hypothetical protein PDE_08920 [Penicillium oxalicum 114-2]
PDE_08925	207	112.7	32.49	-1.79442	Down	0.89177	-	-	-	-	gi|525587713|gb|EPS33963.1|/1.02228e-08/hypothetical protein PDE_08925 [Penicillium oxalicum 114-2]
PDE_08926	1985	84.3433	34.75	-1.27926	Down	0.826373	-	-	GO:0008289//lipid binding	-	gi|525587714|gb|EPS33964.1|/0/hypothetical protein PDE_08926 [Penicillium oxalicum 114-2]
PDE_08930	1363	40.1333	99.0033	1.30268	Up	0.838064	K00306|1|2e-164|516|pcs:Pc12g09740|sarcosine oxidase / L-pipecolate oxidase [EC:1.5.3.1 1.5.3.7]	-	GO:0003824//catalytic activity	GO:0044710	gi|525587718|gb|EPS33968.1|/0/hypothetical protein PDE_08930 [Penicillium oxalicum 114-2]
PDE_08932	2087	6.11	72.58	3.57033	Up	0.912514	-	-	-	-	gi|525587720|gb|EPS33970.1|/0/hypothetical protein PDE_08932 [Penicillium oxalicum 114-2]
PDE_08969	585	27.5033	95.74	1.79952	Up	0.884521	-	-	-	-	gi|525587757|gb|EPS34007.1|/1.05139e-57/hypothetical protein PDE_08969 [Penicillium oxalicum 114-2]
PDE_09002	1038	88.1433	29.6933	-1.56971	Down	0.86296	-	-	-	-	gi|525587790|gb|EPS34040.1|/2.1806e-130/hypothetical protein PDE_09002 [Penicillium oxalicum 114-2]
PDE_09003	258	106.897	32.3233	-1.72557	Down	0.886138	-	-	-	-	gi|525587791|gb|EPS34041.1|/8.03852e-22/hypothetical protein PDE_09003 [Penicillium oxalicum 114-2]
PDE_09012	1662	119.17	21.1167	-2.49657	Down	0.920036	K03231|1|5e-65|231|pan:PODANSg4470|elongation factor 1-alpha	-	-	-	gi|525587800|gb|EPS34050.1|/0/hypothetical protein PDE_09012 [Penicillium oxalicum 114-2]
PDE_09030	660	710.393	204.043	-1.79974	Down	0.929549	-	-	-	-	gi|525587818|gb|EPS34068.1|/3.41763e-96/hypothetical protein PDE_09030 [Penicillium oxalicum 114-2]
PDE_09100	838	40.3233	5.12667	-2.97552	Down	0.860612	-	-	-	-	gi|525587888|gb|EPS34138.1|/9.85433e-126/hypothetical protein PDE_09100 [Penicillium oxalicum 114-2]
PDE_09115	1691	20.65	58.79	1.50943	Up	0.827377	K01807|1|4e-06|53.9|tml:GSTUM_00009363001|ribose 5-phosphate isomerase A [EC:5.3.1.6]	-	-	-	gi|525587901|gb|EPS34151.1|/1.15579e-88/hypothetical protein PDE_09115 [Penicillium oxalicum 114-2]
PDE_09143	1763	15.11	53.75	1.83076	Up	0.847424	K16261|1|0.0|821|pcs:Pc12g05510|yeast amino acid transporter	GO:0031224//intrinsic component of membrane	GO:0046943//carboxylic acid transmembrane transporter activity	GO:0044763;GO:0006865//amino acid transport	gi|525587929|gb|EPS34179.1|/0/hypothetical protein PDE_09143 [Penicillium oxalicum 114-2]
PDE_09166	366	2056.73	43.5967	-5.55999	Down	0.984753	K01409|1|4e-11|66.6|afm:AFUA_7G05240|N6-L-threonylcarbamoyladenine synthase [EC:2.3.1.234]	-	-	-	gi|525587952|gb|EPS34202.1|/6.43805e-35/hypothetical protein PDE_09166 [Penicillium oxalicum 114-2]
PDE_09187	2374	147.653	65.5233	-1.17213	Down	0.834473	K16944|1|0.0|377|nfi:NFIA_026580|septin 7	GO:0005937//mating projection;GO:0000399;GO:0009277//fungal-type cell wall;GO:0032156//septin cytoskeleton;GO:0016020//membrane	GO:0032550;GO:0035091//phosphatidylinositol binding	GO:0031106//septin ring organization;GO:0000910//cytokinesis;GO:0022411	gi|525587973|gb|EPS34223.1|/0/hypothetical protein PDE_09187 [Penicillium oxalicum 114-2]
PDE_09218	1418	529.683	220.053	-1.26728	Down	0.875655	K01238|1|1e-115|417|pcs:Pc12g06220|SUN family beta-glucosidase [EC:3.2.1.-]	-	-	-	gi|525588004|gb|EPS34254.1|/0/SUN domain-containing protein [Penicillium oxalicum 114-2]
PDE_09219	871	148.07	39.4133	-1.90952	Down	0.908549	-	-	-	-	gi|525588005|gb|EPS34255.1|/4.69038e-53/hypothetical protein PDE_09219 [Penicillium oxalicum 114-2]
PDE_09225	234	80.2067	391.523	2.2873	Up	0.942669	-	-	-	-	gi|525588011|gb|EPS34261.1|/4.97467e-19/hypothetical protein PDE_09225 [Penicillium oxalicum 114-2]
PDE_09251	1277	138.457	61.15	-1.17901	Down	0.833997	K16075|1|3e-07|57.0|maw:MAC_02028|magnesium transporter	-	-	-	gi|525588037|gb|EPS34287.1|/1.41256e-108/putative UDP-GlcNAc: N-acetylglucosaminyltransferase [Penicillium oxalicum 114-2]
PDE_09264	952	181.117	521.967	1.52704	Up	0.905691	-	-	-	-	gi|525588050|gb|EPS34300.1|/5.12961e-35/hypothetical protein PDE_09264 [Penicillium oxalicum 114-2]
PDE_09270	980	2.25667	38.1667	4.08005	Up	0.871009	K17738|1|6e-35|148|yli:YALI0F02211g|D-arabinitol 2-dehydrogenase [EC:1.1.1.250]	-	-	GO:0008152//metabolic process	gi|525588056|gb|EPS34306.1|/1.28955e-129/hypothetical protein PDE_09270 [Penicillium oxalicum 114-2]
PDE_09271	705	69.2667	649.06	3.22812	Up	0.961439	-	-	-	-	gi|525588057|gb|EPS34307.1|/8.19049e-102/hypothetical protein PDE_09271 [Penicillium oxalicum 114-2]
PDE_09283	792	18.14	109.143	2.58898	Up	0.918862	-	-	-	-	gi|525588069|gb|EPS34319.1|/2.5291e-132/hypothetical protein PDE_09283 [Penicillium oxalicum 114-2]
PDE_09289	785	191.16	466.997	1.28863	Up	0.876608	-	-	-	-	gi|525588075|gb|EPS34325.1|/2.44445e-55/hypothetical protein PDE_09289 [Penicillium oxalicum 114-2]
PDE_09295	1392	10.8767	43.8	2.00969	Up	0.838796	K00815|1|4e-14|80.1|psq:PUNSTDRAFT_53871|tyrosine aminotransferase [EC:2.6.1.5];K14264|2|4e-13|76.6|spo:SPAC6B12.04c|kynurenine aminotransferase [EC:2.6.1.7]	-	-	-	gi|525588081|gb|EPS34331.1|/0/hypothetical protein PDE_09295 [Penicillium oxalicum 114-2]
PDE_09301	1644	180.267	678.91	1.91309	Up	0.934654	K13524|1|0.0|821|pcs:Pc21g17880|4-aminobutyrate aminotransferase / (S)-3-amino-2-methylpropionate transaminase [EC:2.6.1.19 2.6.1.22]	GO:0044424	GO:0043168//anion binding;GO:0008483//transaminase activity	GO:0009063//cellular amino acid catabolic process	gi|525588087|gb|EPS34337.1|/0/hypothetical protein PDE_09301 [Penicillium oxalicum 114-2]
PDE_09341	2022	31.38	75.8133	1.27261	Up	0.818188	K14539|1|0.0|901|afv:AFLA_049030|large subunit GTPase 1 [EC:3.6.1.-]	GO:0005937//mating projection;GO:0044424	GO:0032550	GO:0022413;GO:0042254//ribosome biogenesis;GO:0022618//ribonucleoprotein complex assembly;GO:0000746//conjugation	gi|525588127|gb|EPS34377.1|/0/hypothetical protein PDE_09341 [Penicillium oxalicum 114-2]
PDE_09377	1859	657.61	219.743	-1.58141	Down	0.914369	K08139|1|5e-90|332|dha:DEHA2C11374g|MFS transporter, SP family, sugar:H+ symporter	GO:0031224//intrinsic component of membrane	GO:0022857//transmembrane transporter activity	GO:0044765//single-organism transport;GO:0044763	gi|525588163|gb|EPS34413.1|/0/hypothetical protein PDE_09377 [Penicillium oxalicum 114-2]
PDE_09380	1012	17.9167	82.7533	2.20752	Up	0.895804	K16066|1|1e-10|68.2|cten:CANTEDRAFT_115865|3-hydroxy acid dehydrogenase / malonic semialdehyde reductase [EC:1.1.1.381 1.1.1.-]	-	-	GO:0008152//metabolic process	gi|525588166|gb|EPS34416.1|/5.07821e-84/hypothetical protein PDE_09380 [Penicillium oxalicum 114-2]
PDE_09406	453	49.21	170.097	1.78933	Up	0.906235	K14552|1|3e-33|140|tve:TRV_05177|NET1-associated nuclear protein 1 (U3 small nucleolar RNA-associated protein 17)	-	-	-	gi|525588192|gb|EPS34442.1|/9.05985e-74/hypothetical protein PDE_09406 [Penicillium oxalicum 114-2]
PDE_09429	2198	74.3467	4.71667	-3.97843	Down	0.918385	K03255|1|9e-06|53.1|ctp:CTRG_04498|protein TIF31	-	-	-	gi|525588215|gb|EPS34465.1|/0/hypothetical protein PDE_09429 [Penicillium oxalicum 114-2]
PDE_09438	2155	38.2433	97.12	1.34456	Up	0.843169	-	-	-	-	gi|525588224|gb|EPS34474.1|/0/hypothetical protein PDE_09438 [Penicillium oxalicum 114-2]
PDE_09441	1209	142.7	30.5633	-2.22311	Down	0.919577	K00960|1|4e-34|146|afm:AFUA_6G10930|DNA-directed RNA polymerase [EC:2.7.7.6]	-	-	-	gi|525588227|gb|EPS34477.1|/0/chitin binding domain-containing protein [Penicillium oxalicum 114-2]
PDE_09456	1591	109.517	46.5433	-1.2345	Down	0.83284	K16948|1|4e-180|516|act:ACLA_002070|cell division control protein 12	GO:0032156//septin cytoskeleton;GO:0000399;GO:0042995//cell projection	GO:0032550;GO:0005515//protein binding;GO:0017111//nucleoside-triphosphatase activity;GO:0035091//phosphatidylinositol binding	GO:0001934//positive regulation of protein phosphorylation;GO:0007163//establishment or maintenance of cell polarity;GO:0009154//purine ribonucleotide catabolic process;GO:0031106//septin ring organization;GO:0000910//cytokinesis	gi|525588242|gb|EPS34492.1|/0/hypothetical protein PDE_09456 [Penicillium oxalicum 114-2]
PDE_09461	1235	49.9767	114.153	1.19165	Up	0.828245	K01495|1|5e-112|197|act:ACLA_002010|GTP cyclohydrolase I [EC:3.5.4.16]	GO:0044424	GO:0003933//GTP cyclohydrolase activity	GO:0009396//folic acid-containing compound biosynthetic process	gi|525588247|gb|EPS34497.1|/1.64095e-120/hypothetical protein PDE_09461 [Penicillium oxalicum 114-2]
PDE_09468	800	430.497	169.123	-1.34793	Down	0.884385	-	GO:0031224//intrinsic component of membrane	-	-	gi|525588254|gb|EPS34504.1|/4.99015e-27/hypothetical protein PDE_09468 [Penicillium oxalicum 114-2]
PDE_09496	780	131.667	406.023	1.62467	Up	0.913161	K20367|1|8e-07|54.7|gtr:GLOTRDRAFT_121678|endoplasmic reticulum-Golgi intermediate compartment protein 3;K00079|2|5e-06|52.0|bsc:COCSADRAFT_105489|carbonyl reductase 1 [EC:1.1.1.184 1.1.1.189 1.1.1.197]	-	GO:0036094//small molecule binding;GO:0003824//catalytic activity	GO:0044710	gi|525588282|gb|EPS34532.1|/9.59936e-145/hypothetical protein PDE_09496 [Penicillium oxalicum 114-2]
PDE_09521	1418	65.18	20.18	-1.6915	Down	0.854009	K19996|1|4e-120|260|pcs:Pc21g01230|phosphatidylinositol transfer protein SFH5	GO:0016020//membrane;GO:0043231//intracellular membrane-bounded organelle	-	-	gi|525588307|gb|EPS34557.1|/0/hypothetical protein PDE_09521 [Penicillium oxalicum 114-2]
PDE_09526	369	35.6133	87.23	1.29241	Up	0.829607	-	-	-	-	gi|525588312|gb|EPS34562.1|/9.81385e-68/hypothetical protein PDE_09526 [Penicillium oxalicum 114-2]
PDE_09532	3066	7.58333	149.8	4.30406	Up	0.948659	K01183|1|2e-96|195|pcs:Pc22g13690|chitinase [EC:3.2.1.14]	-	GO:0016787//hydrolase activity	-	gi|525588318|gb|EPS34568.1|/0/putative chitinase [Penicillium oxalicum 114-2]
PDE_09581	1802	24.34	1.75333	-3.79516	Down	0.816656	-	-	-	-	gi|859262018|emb|CEJ60295.1|/0/hypothetical protein PMG11_08875 [Penicillium brasilianum]
PDE_09593	1117	118.11	672.863	2.51018	Up	0.952658	K06215|1|1e-115|347|pcs:Pc22g15930|pyridoxal 5'-phosphate synthase pdxS subunit [EC:4.3.3.6]	-	-	GO:0009108//coenzyme biosynthetic process	gi|525588379|gb|EPS34629.1|/9.24016e-126/hypothetical protein PDE_09593 [Penicillium oxalicum 114-2]
PDE_09605	2345	82.1767	176.777	1.10513	Up	0.829198	-	-	-	-	gi|525588391|gb|EPS34641.1|/0/hypothetical protein PDE_09605 [Penicillium oxalicum 114-2]
PDE_09609	829	157.77	28.4	-2.47386	Down	0.929055	-	-	GO:0003824//catalytic activity	-	gi|525588395|gb|EPS34645.1|/9.09277e-128/hypothetical protein PDE_09609 [Penicillium oxalicum 114-2]
PDE_09616	1194	36.2967	85.9867	1.24428	Up	0.821694	K18369|1|6e-163|574|bfu:BC1G_11541|alcohol dehydrogenase [EC:1.1.1.-]	-	GO:0046914//transition metal ion binding;GO:0036094//small molecule binding;GO:0003824//catalytic activity	GO:0044710	gi|525588402|gb|EPS34652.1|/0/hypothetical protein PDE_09616 [Penicillium oxalicum 114-2]
PDE_09643	1150	12.5833	43.51	1.78983	Up	0.824229	K00859|1|6e-36|152|ani:AN8047.2|dephospho-CoA kinase [EC:2.7.1.24]	-	-	-	gi|525588429|gb|EPS34679.1|/6.47559e-134/hypothetical protein PDE_09643 [Penicillium oxalicum 114-2]
PDE_09658	1099	296.507	86.8	-1.7723	Down	0.918198	K13127|1|6e-125|259|act:ACLA_012790|RING finger protein 113A	GO:0043231//intracellular membrane-bounded organelle	GO:0046872//metal ion binding;GO:0003676//nucleic acid binding	GO:0006396//RNA processing	gi|525588444|gb|EPS34694.1|/6.36956e-161/hypothetical protein PDE_09658 [Penicillium oxalicum 114-2]
PDE_09659	246	193.983	69.4733	-1.4814	Down	0.883143	-	-	-	-	gi|525588445|gb|EPS34695.1|/1.99057e-36/hypothetical protein PDE_09659 [Penicillium oxalicum 114-2]
PDE_09666	453	28.3833	202.433	2.83433	Up	0.941784	-	-	-	-	gi|525588452|gb|EPS34702.1|/1.18325e-73/hypothetical protein PDE_09666 [Penicillium oxalicum 114-2]
PDE_09667	380	14.1433	57.4	2.02093	Up	0.863267	-	-	-	-	gi|525588453|gb|EPS34703.1|/1.63058e-14/hypothetical protein PDE_09667 [Penicillium oxalicum 114-2]
PDE_09673	1715	37.9967	182.25	2.26197	Up	0.927524	K16261|1|0.0|630|afv:AFLA_063210|yeast amino acid transporter	GO:0031224//intrinsic component of membrane	GO:0046943//carboxylic acid transmembrane transporter activity	GO:0044763;GO:0006865//amino acid transport	gi|525588459|gb|EPS34709.1|/0/hypothetical protein PDE_09673 [Penicillium oxalicum 114-2]
PDE_09695	1101	61.0467	150.737	1.30405	Up	0.855728	K12274|1|7e-76|187|afv:AFLA_057460|translocation protein SEC72	-	-	-	gi|525588481|gb|EPS34731.1|/5.24316e-103/hypothetical protein PDE_09695 [Penicillium oxalicum 114-2]
PDE_09700	684	75.7	31.23	-1.27736	Down	0.819107	K19626|1|1e-19|96.7|maj:MAA_10441|inversin;K06653|2|8e-12|70.9|cci:CC1G_01320|CDK inhibitor PHO81;K06694|4|8e-12|70.9|clu:CLUG_01956|26S proteasome non-ATPase regulatory subunit 10;K15503|5|2e-11|69.7|pan:PODANSg5497|serine/threonine-protein phosphatase 6 regulatory ankyrin repeat subunit B	-	-	-	gi|525588486|gb|EPS34736.1|/1.49693e-129/hypothetical protein PDE_09700 [Penicillium oxalicum 114-2]
PDE_09702	1288	31.4767	81.34	1.36968	Up	0.836294	K00545|1|9e-26|118|pbl:PAAG_11954|catechol O-methyltransferase [EC:2.1.1.6]	-	-	GO:0008152//metabolic process	gi|525588488|gb|EPS34738.1|/9.16584e-162/hypothetical protein PDE_09702 [Penicillium oxalicum 114-2]
PDE_09704	1952	65.4433	144.53	1.14305	Up	0.828347	K06185|1|0.0|800|ang:ANI_1_20154|ATP-binding cassette, subfamily F, member 2	GO:0043231//intracellular membrane-bounded organelle;GO:0030529//intracellular ribonucleoprotein complex	GO:0032550;GO:0016887//ATPase activity	GO:0000054//ribosomal subunit export from nucleus;GO:0009154//purine ribonucleotide catabolic process	gi|525588490|gb|EPS34740.1|/0/hypothetical protein PDE_09704 [Penicillium oxalicum 114-2]
PDE_09722	3853	20.5633	53.8267	1.38825	Up	0.806616	K20168|1|4e-34|148|ssl:SS1G_09016|TBC1 domain family member 15;K19692|4|4e-16|88.6|ttt:THITE_2109219|osomolarity two-component system, sensor histidine kinase TcsA [EC:2.7.13.3]	-	GO:0016772//transferase activity, transferring phosphorus-containing groups;GO:0004871//signal transducer activity	GO:0007165//signal transduction;GO:0044237//cellular metabolic process	gi|525588508|gb|EPS34758.1|/0/hypothetical protein PDE_09722 [Penicillium oxalicum 114-2]
PDE_09727	1541	42.45	104.69	1.30229	Up	0.841025	K00641|1|0.0|876|pcs:Pc21g18210|homoserine O-acetyltransferase [EC:2.3.1.31]	GO:0044424	GO:0016413//O-acetyltransferase activity	GO:0000097//sulfur amino acid biosynthetic process	gi|525588513|gb|EPS34763.1|/0/hypothetical protein PDE_09727 [Penicillium oxalicum 114-2]
PDE_09764	1749	107.453	239.17	1.15433	Up	0.84402	K08165|1|8e-16|86.3|ncs:NCAS_0C00400|MFS transporter, DHA2 family, multidrug resistance protein	-	-	-	gi|525588550|gb|EPS34800.1|/0/hypothetical protein PDE_09764 [Penicillium oxalicum 114-2]
PDE_09780	929	168.78	19.8967	-3.08455	Down	0.940048	-	-	-	-	gi|525588566|gb|EPS34816.1|/3.37107e-128/hypothetical protein PDE_09780 [Penicillium oxalicum 114-2]
PDE_09784	4784	126.28	60.6867	-1.05717	Down	0.808267	-	-	-	-	gi|525588570|gb|EPS34820.1|/0/hypothetical protein PDE_09784 [Penicillium oxalicum 114-2]
PDE_09794	459	2.02667	67.3867	5.05528	Up	0.924375	-	-	-	-	gi|525588580|gb|EPS34830.1|/7.57823e-92/hypothetical protein PDE_09794 [Penicillium oxalicum 114-2]
PDE_09805	903	59.84	124.643	1.05862	Up	0.807825	-	-	-	-	gi|525588591|gb|EPS34841.1|/3.99479e-151/hypothetical protein PDE_09805 [Penicillium oxalicum 114-2]
PDE_09813	1337	13.2533	40.59	1.61477	Up	0.804098	K04345|1|1e-155|434|afv:AFLA_091910|protein kinase A [EC:2.7.11.11]	-	GO:0004672//protein kinase activity;GO:0032550	GO:0006796//phosphate-containing compound metabolic process;GO:0006464//cellular protein modification process	gi|525588599|gb|EPS34849.1|/0/hypothetical protein PDE_09813 [Penicillium oxalicum 114-2]
PDE_09818	1562	91.7867	34.89	-1.39547	Down	0.846743	K16945|1|3e-150|343|ani:AN4667.2|cell division control protein 11	GO:0005937//mating projection;GO:0000399;GO:0005874//microtubule;GO:0009277//fungal-type cell wall;GO:0032156//septin cytoskeleton;GO:0005819//spindle;GO:0016020//membrane	GO:0032550;GO:0035091//phosphatidylinositol binding	GO:0000910//cytokinesis;GO:0001934//positive regulation of protein phosphorylation	gi|115398728|ref|XP_001214953.1|/1.8348e-154/hypothetical protein ATEG_05775 [Aspergillus terreus NIH2624]
PDE_09828	756	65.91	166.797	1.33952	Up	0.8649	K00236|1|1e-53|209|pcs:Pc22g14260|succinate dehydrogenase (ubiquinone) cytochrome b560 subunit	GO:0043234//protein complex	GO:0016627//oxidoreductase activity, acting on the CH-CH group of donors	GO:0009060//aerobic respiration	gi|525588614|gb|EPS34864.1|/1.16244e-67/hypothetical protein PDE_09828 [Penicillium oxalicum 114-2]
PDE_09831	895	38.9	2.11333	-4.20218	Down	0.874787	-	-	-	-	gi|525588617|gb|EPS34867.1|/8.0901e-72/hypothetical protein PDE_09831 [Penicillium oxalicum 114-2]
PDE_09832	541	716.18	120.21	-2.57477	Down	0.954428	-	GO:0005618//cell wall	GO:0005198//structural molecule activity	-	gi|525588618|gb|EPS34868.1|/1.08467e-60/hypothetical protein PDE_09832 [Penicillium oxalicum 114-2]
PDE_09845	1080	1086.9	302.003	-1.84758	Down	0.934824	-	-	-	-	gi|525588631|gb|EPS34881.1|/0/hypothetical protein PDE_09845 [Penicillium oxalicum 114-2]
PDE_09864	1567	37.55	96.6767	1.36435	Up	0.845262	-	-	-	-	gi|525588650|gb|EPS34900.1|/3.3007e-145/putative lipopolysaccharide beta-1,4-N-acetylgalactosaminyltransferase [Penicillium oxalicum 114-2]
PDE_09868	1880	17.3933	48.71	1.48568	Up	0.807025	K09246|1|1e-07|58.9|nhe:NECHADRAFT_41666|arginine metabolism regulation protein II	-	-	GO:0006351//transcription, DNA-templated	gi|525588654|gb|EPS34904.1|/0/hypothetical protein PDE_09868 [Penicillium oxalicum 114-2]
PDE_09872	381	32.4067	2.13667	-3.92286	Down	0.852308	-	-	-	-	gi|525588658|gb|EPS34908.1|/7.23172e-47/hypothetical protein PDE_09872 [Penicillium oxalicum 114-2]
PDE_09880	1752	196.74	23.4533	-3.06843	Down	0.943605	K08157|1|5e-70|266|ssl:SS1G_02048|MFS transporter, DHA1 family, multidrug resistance protein	-	-	-	gi|525588666|gb|EPS34916.1|/0/hypothetical protein PDE_09880 [Penicillium oxalicum 114-2]
PDE_09893	1539	10.9133	42.7367	1.96938	Up	0.832704	K10392|1|3e-26|120|ure:UREG_01378|kinesin family member 1	-	-	-	gi|525588679|gb|EPS34929.1|/0/hypothetical protein PDE_09893 [Penicillium oxalicum 114-2]
PDE_09894	516	86.36	657.287	2.92809	Up	0.958427	-	-	-	-	gi|525588680|gb|EPS34930.1|/2.04101e-31/hypothetical protein PDE_09894 [Penicillium oxalicum 114-2]
PDE_09897	370	403.003	832.483	1.04663	Up	0.839953	-	-	-	-	gi|525588683|gb|EPS34933.1|/1.72551e-33/hypothetical protein PDE_09897 [Penicillium oxalicum 114-2]
PDE_09913	1902	12.2833	46.14	1.90932	Up	0.838013	-	-	-	-	gi|525588698|gb|EPS34948.1|/0/hypothetical protein PDE_09913 [Penicillium oxalicum 114-2]
PDE_09920	1178	62.6333	140.073	1.16118	Up	0.830832	K00067|1|2e-104|379|afm:AFUA_5G02240|dTDP-4-dehydrorhamnose reductase [EC:1.1.1.133];K06210|3|1e-74|280|mbe:MBM_05283|nicotinamide mononucleotide adenylyltransferase [EC:2.7.7.1 2.7.7.18];K00789|5|1e-45|184|mlr:MELLADRAFT_90437|S-adenosylmethionine synthetase [EC:2.5.1.6]	-	GO:0036094//small molecule binding;GO:0016616//oxidoreductase activity, acting on the CH-OH group of donors, NAD or NADP as acceptor	GO:0033692//cellular polysaccharide biosynthetic process	gi|525588705|gb|EPS34955.1|/6.71251e-134/hypothetical protein PDE_09920 [Penicillium oxalicum 114-2]
PDE_09938	730	28.1333	85.0667	1.59631	Up	0.86456	-	-	-	-	gi|525588723|gb|EPS34973.1|/1.32784e-119/hypothetical protein PDE_09938 [Penicillium oxalicum 114-2]
PDE_09959	739	70.2767	147.7	1.07155	Up	0.816163	-	-	-	-	gi|525588744|gb|EPS34994.1|/2.60564e-52/hypothetical protein PDE_09959 [Penicillium oxalicum 114-2]
PDE_09964	1434	807.877	205.747	-1.97327	Down	0.937819	K01078|1|6e-133|474|afv:AFLA_024970|acid phosphatase [EC:3.1.3.2]	-	-	-	gi|525588749|gb|EPS34999.1|/0/hypothetical protein PDE_09964 [Penicillium oxalicum 114-2]
